# Supplementary material for: Trends and Disparities in Colorectal and Anal Carcinoma- Related Mortality Among U.S. Adults (1999-2023) with Predictions Using Machine Learning
Source: Research Square preprint supplement (doi:10.21203/rs.3.rs-8106965/v1), 2025-12-18
Supplement: Supplementary file 1 [file 02a08cf61c612b347c77eb81.xlsx]

## Sheet: Sheet1
Notes	Year	Year Code	Deaths	Population	Crude Rate	Crude Rate Lower 95% Confidence Interval	Crude Rate Upper 95% Confidence Interval	Crude Rate Standard Error	Age Adjusted Rate	Age Adjusted Rate Lower 95% Confidence Interval	Age Adjusted Rate Upper 95% Confidence Interval	Age Adjusted Rate Standard Error	% of Total Deaths
	1999	1999	11107	29163427	38.0854	37.3771	38.7937	0.361376	33.4952	32.871	34.1194	0.318485	0.0486187
	2000	2000	11126	29325941	37.9391	37.2341	38.6441	0.359681	33.2412	32.6223	33.8601	0.315784	0.0487019
	2001	2001	10990	29408870	37.3697	36.671	38.0684	0.356468	32.6275	32.0161	33.2388	0.311906	0.0481066
	2002	2002	11076	29548977	37.4835	36.7855	38.1816	0.356163	32.5351	31.9278	33.1425	0.309885	0.048483
	2003	2003	10696	29722714	35.9859	35.304	36.6679	0.347954	31.048	30.458	31.638	0.301023	0.0468197
	2004	2004	10434	29933287	34.8575	34.1887	35.5264	0.341249	29.9754	29.3982	30.5526	0.294489	0.0456728
	2005	2005	10291	30179558	34.0992	33.4404	34.7581	0.336137	29.1852	28.619	29.7513	0.288844	0.0450469
	2006	2006	10173	30495970	33.3585	32.7103	34.0067	0.330736	28.4021	27.8473	28.9568	0.283034	0.0445303
	2007	2007	10466	30752891	34.0326	33.3806	34.6846	0.332663	28.7572	28.2028	29.3116	0.282859	0.0458129
	2008	2008	10398	30969063	33.5754	32.9301	34.2208	0.329266	28.2139	27.6673	28.7605	0.27887	0.0455152
	2009	2009	10085	31141442	32.3845	31.7524	33.0166	0.322477	26.9881	26.4564	27.5198	0.271284	0.0441451
	2010	2010	10314	31300878	32.9512	32.3152	33.5871	0.324457	27.3534	26.8196	27.8872	0.272359	0.0451475
	2011	2011	10161	31388404	32.3718	31.7424	33.0013	0.321143	26.5999	26.0756	27.1243	0.267516	0.0444778
	2012	2012	10118	31402361	32.2205	31.5927	32.8483	0.320321	26.0337	25.5181	26.5492	0.263027	0.0442896
	2013	2013	10143	31450865	32.2503	31.6227	32.8779	0.320222	25.8689	25.3558	26.3819	0.261751	0.044399
	2014	2014	9962	31505264	31.6201	30.9992	32.241	0.316804	25.1658	24.6607	25.6709	0.257697	0.0436067
	2015	2015	10288	31594511	32.5626	31.9334	33.1918	0.321036	25.5711	25.0654	26.0768	0.258012	0.0450337
	2016	2016	10046	31678227	31.7126	31.0925	32.3328	0.316399	24.6769	24.1822	25.1716	0.252401	0.0439744
	2017	2017	10208	31772269	32.1286	31.5054	32.7519	0.317996	24.8296	24.3337	25.3254	0.252976	0.0446835
	2018	2018	10146	31896166	31.8095	31.1905	32.4284	0.315798	24.3495	23.8609	24.8381	0.249296	0.0444121
	2019	2019	10150	31974679	31.7439	31.1263	32.3614	0.315084	24.0415	23.5587	24.5244	0.246359	0.0444297
	2020	2020	10073	32028405	31.4502	30.836	32.0644	0.31336	23.6916	23.212	24.1713	0.244734	0.0440926
Total			228451	678634169	33.6634	33.5253	33.8014	0.0704305	27.5171	27.403	27.6311	0.0581774	1
