# Supplementary material for: Trends and Disparities in Colorectal and Anal Carcinoma- Related Mortality Among U.S. Adults (1999-2023) with Predictions Using Machine Learning
Source: Research Square preprint supplement (doi:10.21203/rs.3.rs-8106965/v1), 2025-12-18
Supplement: Supplementary file 2 [file 1819d1b496c3f518ce252271.xlsx]

## Sheet: Sheet1
Notes	State	State Code	Year	Year Code	Deaths	Population	Crude Rate	Crude Rate Lower 95% Confidence Interval	Crude Rate Upper 95% Confidence Interval	Crude Rate Standard Error	Age Adjusted Rate	Age Adjusted Rate Lower 95% Confidence Interval	Age Adjusted Rate Upper 95% Confidence Interval	Age Adjusted Rate Standard Error	Mean AAMR
	Wyoming	56	2023	2023	100	401069	24.9334	20.0464	29.8203	2.49334	20.6823	16.5207	24.844	2.12328
	Wyoming	56	2022	2022	123	396960	30.9855	25.5095	36.4615	2.79387	26.6943	21.8198	31.5689	2.48701
	Wyoming	56	2021	2021	105	394198	26.6364	21.5415	31.7313	2.59944	22.8012	18.306	27.2965	2.29351
	Wyoming	56	2020	2020	105	396659	26.4711	21.4078	31.5344	2.58331	21.4135	17.1923	25.6347	2.15369
	Wyoming	56	2019	2019	90	392504	22.9297	18.4382	28.1845	2.417	19.5024	15.5778	24.1151	2.10978
	Wyoming	56	2018	2018	94	390595	24.0658	19.4476	29.4506	2.4822	20.9311	16.8094	25.7577	2.21604
	Wyoming	56	2017	2017	74	390293	18.9601	14.8879	23.8027	2.20407	16.6165	12.9534	20.994	1.98143
	Wyoming	56	2016	2016	82	391412	20.9498	16.662	26.0041	2.31352	18.8166	14.8738	23.4841	2.13408
	Wyoming	56	2015	2015	91	390698	23.2916	18.753	28.597	2.44163	21.5324	17.2466	26.5602	2.31302
	Wyoming	56	2014	2014	71	388387	18.2807	14.2774	23.0586	2.16952	16.921	13.1398	21.4514	2.05802
	Wyoming	56	2013	2013	79	386413	20.4444	16.1861	25.4799	2.30018	19.4653	15.3365	24.3638	2.23364
	Wyoming	56	2012	2012	95	382778	24.8186	20.0797	30.3395	2.54633	24.1212	19.4451	29.5825	2.51575
	Wyoming	56	2011	2011	90	375992	23.9367	19.248	29.4222	2.52315	22.5557	18.0417	27.8561	2.42901
	Wyoming	56	2010	2010	101	371795	27.1655	21.8675	32.4635	2.70307	25.6959	20.565	30.8268	2.61779
	Wyoming	56	2009	2009	79	367455	21.4992	17.0212	26.7945	2.41885	21.4094	16.8959	26.7582	2.43467
	Wyoming	56	2008	2008	88	357553	24.6117	19.7394	30.3224	2.62362	24.1648	19.3287	29.8433	2.60947
	Wyoming	56	2007	2007	101	349521	28.8967	23.261	34.5323	2.87533	28.9823	23.2816	34.6831	2.90856
	Wyoming	56	2006	2006	100	340550	29.3643	23.6089	35.1197	2.93643	29.3631	23.5668	35.1594	2.95729
	Wyoming	56	2005	2005	71	333442	21.2931	16.6301	26.8582	2.52702	21.4615	16.7303	27.1153	2.56776
	Wyoming	56	2004	2004	85	328164	25.9017	20.6892	32.0279	2.80943	26.0336	20.7654	32.2314	2.84136
	Wyoming	56	2003	2003	106	323532	32.7634	26.5261	39.0006	3.18226	33.2541	26.8899	39.6184	3.24706
	Wyoming	56	2002	2002	93	320576	29.0103	23.4151	35.5396	3.00823	30.1113	24.2739	36.9288	3.13507
	Wyoming	56	2001	2001	101	316635	31.8979	25.677	38.1189	3.17396	32.7831	26.3665	39.1998	3.2738
	Wyoming	56	2000	2000	91	314981	28.8906	23.261	35.4713	3.02856	30.4853	24.5449	37.4292	3.20329
	Wyoming	56	1999	1999	94	311132	30.2123	24.4145	36.9722	3.11616	31.8397	25.6988	39.0059	3.29343
															24.3055
	Wisconsin	55	2023	2023	924	4109427	22.4849	21.0351	23.9347	0.739698	18.5701	17.3383	19.8018	0.628456
	Wisconsin	55	2022	2022	908	4081312	22.2477	20.8006	23.6948	0.738317	18.2007	16.9821	19.4193	0.621751
	Wisconsin	55	2021	2021	889	4071415	21.8352	20.3998	23.2705	0.732328	18.569	17.3187	19.8194	0.637926
	Wisconsin	55	2020	2020	865	4029646	21.4659	20.0354	22.8964	0.729863	17.4233	16.2328	18.6139	0.607429
	Wisconsin	55	2019	2019	909	4009767	22.6696	21.1959	24.1434	0.751905	18.6596	17.4193	19.8999	0.632811
	Wisconsin	55	2018	2018	951	3985700	23.8603	22.3438	25.3768	0.773723	19.6797	18.4008	20.9587	0.65254
	Wisconsin	55	2017	2017	908	3955626	22.9546	21.4616	24.4477	0.761777	19.3575	18.0705	20.6445	0.656638
	Wisconsin	55	2016	2016	955	3929154	24.3055	22.7639	25.847	0.786507	20.5064	19.1791	21.8338	0.677235
	Wisconsin	55	2015	2015	926	3913342	23.6626	22.1385	25.1867	0.777603	19.8704	18.5671	21.1737	0.664943
	Wisconsin	55	2014	2014	958	3894051	24.6016	23.0437	26.1595	0.794843	21.1121	19.7515	22.4726	0.694136
	Wisconsin	55	2013	2013	977	3875954	25.2067	23.6261	26.7873	0.806434	21.7868	20.399	23.1747	0.708101
	Wisconsin	55	2012	2012	941	3854772	24.4113	22.8516	25.971	0.795786	21.2521	19.8751	22.6291	0.702549
	Wisconsin	55	2011	2011	996	3830095	26.0046	24.3896	27.6196	0.823987	23.0636	21.6132	24.514	0.740008
	Wisconsin	55	2010	2010	946	3798238	24.9063	23.3191	26.4934	0.809773	22.5301	21.0794	23.9807	0.74014
	Wisconsin	55	2009	2009	916	3773090	24.2772	22.705	25.8494	0.802141	21.9497	20.5155	23.384	0.731772
	Wisconsin	55	2008	2008	1013	3739712	27.0876	25.4195	28.7557	0.851073	24.663	23.1332	26.1927	0.780484
	Wisconsin	55	2007	2007	954	3703311	25.7607	24.126	27.3954	0.834034	23.4589	21.9607	24.9571	0.764389
	Wisconsin	55	2006	2006	982	3664283	26.7992	25.1231	28.4754	0.855198	24.7272	23.1725	26.2819	0.793207
	Wisconsin	55	2005	2005	1000	3630762	27.5424	25.8353	29.2495	0.870968	25.4832	23.8971	27.0694	0.80927
	Wisconsin	55	2004	2004	1006	3595912	27.9762	26.2474	29.705	0.882043	26.1857	24.5624	27.809	0.828223
	Wisconsin	55	2003	2003	1075	3563354	30.1682	28.3648	31.9716	0.920122	28.4125	26.7095	30.1155	0.868869
	Wisconsin	55	2002	2002	1060	3534632	29.989	28.1836	31.7943	0.921104	28.5201	26.7996	30.2406	0.877792
	Wisconsin	55	2001	2001	1128	3504789	32.1845	30.3063	34.0628	0.958281	30.7023	28.9075	32.4971	0.915713
	Wisconsin	55	2000	2000	1177	3474290	33.8774	31.942	35.8129	0.987466	32.4034	30.5493	34.2574	0.945931
	Wisconsin	55	1999	1999	1170	3451577	33.8975	31.9552	35.8399	0.991004	32.5833	30.7136	34.4529	0.953887
															23.1868
	West Virginia	54	2023	2023	438	1262554	34.6916	31.4426	37.9405	1.65763	26.4996	23.9239	29.0754	1.31417
	West Virginia	54	2022	2022	418	1263599	33.0801	29.9088	36.2514	1.618	25.0101	22.5296	27.4906	1.26556
	West Virginia	54	2021	2021	447	1270528	35.1822	31.9207	38.4438	1.66406	27.588	24.937	30.2389	1.35252
	West Virginia	54	2020	2020	445	1275287	34.8941	31.652	38.1362	1.65414	25.8593	23.3849	28.3337	1.26247
	West Virginia	54	2019	2019	433	1278794	33.86	30.6707	37.0494	1.62721	25.499	23.0281	27.9699	1.26066
	West Virginia	54	2018	2018	456	1284823	35.4913	32.2337	38.7489	1.66203	27.879	25.2375	30.5204	1.34766
	West Virginia	54	2017	2017	403	1287534	31.3001	28.2442	34.3561	1.55917	24.5221	22.0592	26.985	1.25656
	West Virginia	54	2016	2016	453	1294399	34.9969	31.7741	38.2198	1.6443	27.8351	25.2125	30.4576	1.33805
	West Virginia	54	2015	2015	473	1298938	36.4144	33.1327	39.6961	1.67433	29.3054	26.6115	31.9992	1.37441
	West Virginia	54	2014	2014	460	1299670	35.3936	32.1591	38.6281	1.65024	28.8282	26.1396	31.5167	1.37171
	West Virginia	54	2013	2013	485	1300710	37.2873	33.9688	40.6059	1.69313	30.5405	27.7771	33.3038	1.40985
	West Virginia	54	2012	2012	421	1300233	32.3788	29.2858	35.4718	1.57805	27.1092	24.4817	29.7367	1.34054
	West Virginia	54	2011	2011	437	1299073	33.6394	30.4854	36.7934	1.60919	28.6404	25.9154	31.3655	1.39033
	West Virginia	54	2010	2010	408	1296577	31.4675	28.414	34.5209	1.55787	26.9071	24.2677	29.5464	1.34662
	West Virginia	54	2009	2009	504	1290716	39.0481	35.639	42.4572	1.73934	33.425	30.4811	36.3688	1.50197
	West Virginia	54	2008	2008	428	1283930	33.3352	30.177	36.4933	1.61132	28.4647	25.7461	31.1833	1.38705
	West Virginia	54	2007	2007	476	1276766	37.2817	33.9324	40.6309	1.7088	32.2162	29.3022	35.1302	1.48673
	West Virginia	54	2006	2006	439	1269071	34.5922	31.3563	37.8282	1.651	30.0805	27.2528	32.9082	1.4427
	West Virginia	54	2005	2005	439	1259131	34.8653	31.6038	38.1268	1.66403	30.4542	27.5952	33.3133	1.45872
	West Virginia	54	2004	2004	491	1250915	39.2513	35.7794	42.7232	1.77138	34.3016	31.2578	37.3454	1.55297
	West Virginia	54	2003	2003	510	1244913	40.9667	37.4112	44.5222	1.81404	36.2205	33.0657	39.3753	1.60959
	West Virginia	54	2002	2002	501	1237245	40.4932	36.9474	44.039	1.8091	35.8685	32.7211	39.0159	1.60582
	West Virginia	54	2001	2001	508	1231765	41.2416	37.6552	44.828	1.8298	36.9252	33.7069	40.1435	1.642
	West Virginia	54	2000	2000	471	1233520	38.1834	34.735	41.6318	1.7594	34.2955	31.1928	37.3982	1.58301
	West Virginia	54	1999	1999	520	1229266	42.3017	38.6658	45.9376	1.85505	38.0657	34.7883	41.3431	1.67213
															30.0936
	Washington	53	2023	2023	1135	5508984	20.6027	19.4041	21.8013	0.611542	18.8944	17.7751	20.0138	0.571091
	Washington	53	2022	2022	1189	5462015	21.7685	20.5312	23.0059	0.631303	19.7167	18.5777	20.8557	0.581133
	Washington	53	2021	2021	1131	5409796	20.9065	19.6881	22.125	0.621656	19.5871	18.4211	20.7532	0.594929
	Washington	53	2020	2020	1030	5369911	19.181	18.0095	20.3524	0.597656	17.7226	16.6195	18.8256	0.562788
	Washington	53	2019	2019	1090	5293324	20.592	19.3695	21.8145	0.623713	18.9011	17.7586	20.0437	0.582951
	Washington	53	2018	2018	1024	5214860	19.6362	18.4335	20.8389	0.613631	18.1029	16.9731	19.2328	0.576435
	Washington	53	2017	2017	1070	5107058	20.9514	19.696	22.2068	0.640503	19.6815	18.4779	20.885	0.614037
	Washington	53	2016	2016	1050	4997308	21.0113	19.7404	22.2822	0.648423	19.4614	18.2598	20.663	0.613062
	Washington	53	2015	2015	1022	4892139	20.8907	19.6099	22.1715	0.653472	19.6016	18.3755	20.8276	0.625537
	Washington	53	2014	2014	931	4790239	19.4354	18.1869	20.6838	0.636968	18.3392	17.1373	19.5411	0.613212
	Washington	53	2013	2013	985	4709173	20.9166	19.6104	22.2229	0.666459	19.8428	18.5796	21.106	0.644499
	Washington	53	2012	2012	989	4644166	21.2955	19.9683	22.6228	0.677159	20.4499	19.1529	21.7469	0.661738
	Washington	53	2011	2011	1045	4582540	22.8039	21.4213	24.1866	0.705427	22.2838	20.9092	23.6583	0.701301
	Washington	53	2010	2010	985	4493133	21.9223	20.5533	23.2914	0.698504	21.8189	20.4364	23.2014	0.70536
	Washington	53	2009	2009	986	4440946	22.2025	20.8166	23.5883	0.707071	22.1808	20.7772	23.5844	0.716131
	Washington	53	2008	2008	1053	4359520	24.154	22.6951	25.613	0.744347	24.4037	22.9119	25.8954	0.761111
	Washington	53	2007	2007	981	4282914	22.905	21.4716	24.3383	0.731299	23.2403	21.7711	24.7095	0.749604
	Washington	53	2006	2006	945	4204829	22.4742	21.0412	23.9071	0.731084	23.1457	21.6572	24.6343	0.759459
	Washington	53	2005	2005	949	4111356	23.0824	21.6138	24.551	0.749287	23.9985	22.4615	25.5356	0.784201
	Washington	53	2004	2004	987	4040177	24.4296	22.9055	25.9537	0.777603	25.7041	24.0919	27.3163	0.822536
	Washington	53	2003	2003	1025	3976054	25.7793	24.2011	27.3575	0.805211	27.365	25.6829	29.0471	0.85823
	Washington	53	2002	2002	962	3932227	24.4645	22.9185	26.0105	0.788767	26.1616	24.5029	27.8204	0.846281
	Washington	53	2001	2001	1029	3881739	26.5087	24.889	28.1284	0.826383	28.6349	26.8811	30.3887	0.894793
	Washington	53	2000	2000	995	3820917	26.0409	24.4228	27.6589	0.825551	28.2817	26.5218	30.0416	0.897919
	Washington	53	1999	1999	994	3786793	26.2491	24.6173	27.881	0.832572	28.6899	26.9043	30.4755	0.911008
															22.2484
	Virginia	51	2023	2023	1484	6032545	24.5999	23.3483	25.8515	0.638582	21.3008	20.1979	22.4037	0.562694
	Virginia	51	2022	2022	1414	5993414	23.5926	22.3628	24.8223	0.627409	20.399	19.3188	21.4791	0.551086
	Virginia	51	2021	2021	1324	5957609	22.2237	21.0266	23.4208	0.610762	20.0003	18.9028	21.0979	0.559979
	Virginia	51	2020	2020	1382	5924757	23.3259	22.096	24.5557	0.627456	20.5636	19.461	21.6663	0.562568
	Virginia	51	2019	2019	1348	5876474	22.9389	21.7144	24.1635	0.624781	20.2558	19.1569	21.3547	0.560667
	Virginia	51	2018	2018	1350	5842846	23.1052	21.8726	24.3377	0.628843	20.783	19.6573	21.9088	0.574355
	Virginia	51	2017	2017	1335	5795909	23.0335	21.7979	24.2691	0.630404	21.2035	20.0472	22.3598	0.589943
	Virginia	51	2016	2016	1311	5729478	22.8817	21.643	24.1203	0.631955	21.302	20.1299	22.4742	0.59803
	Virginia	51	2015	2015	1328	5689603	23.3408	22.0854	24.5962	0.640497	22.1453	20.9344	23.3563	0.617826
	Virginia	51	2014	2014	1266	5627793	22.4955	21.2563	23.7347	0.632235	21.6249	20.4155	22.8343	0.617035
	Virginia	51	2013	2013	1219	5566663	21.8982	20.6689	23.1275	0.627201	21.3217	20.1068	22.5367	0.619859
	Virginia	51	2012	2012	1248	5505937	22.6664	21.4089	23.924	0.641617	22.3494	21.0911	23.6077	0.641994
	Virginia	51	2011	2011	1198	5428990	22.0667	20.8171	23.3163	0.637543	21.92	20.6611	23.179	0.642329
	Virginia	51	2010	2010	1252	5345248	23.4227	22.1252	24.7201	0.661964	23.8142	22.4783	25.15	0.681539
	Virginia	51	2009	2009	1251	5280924	23.689	22.3763	25.0018	0.669759	24.2053	22.8498	25.5607	0.691574
	Virginia	51	2008	2008	1301	5202545	25.007	23.6481	26.3659	0.693303	25.8002	24.3851	27.2152	0.721986
	Virginia	51	2007	2007	1289	5129528	25.129	23.7572	26.5009	0.699921	26.2735	24.8258	27.7211	0.738604
	Virginia	51	2006	2006	1278	5065837	25.2278	23.8447	26.611	0.70569	26.6561	25.1823	28.1299	0.751923
	Virginia	51	2005	2005	1250	4992937	25.0354	23.6475	26.4233	0.708107	26.7713	25.2759	28.2667	0.762969
	Virginia	51	2004	2004	1295	4919847	26.322	24.8883	27.7556	0.731448	28.4743	26.9119	30.0366	0.797111
	Virginia	51	2003	2003	1359	4849408	28.024	26.5341	29.514	0.760188	30.5417	28.9076	32.1759	0.833747
	Virginia	51	2002	2002	1366	4796375	28.4798	26.9695	29.9902	0.77057	31.2915	29.6229	32.9601	0.851335
	Virginia	51	2001	2001	1350	4736985	28.4991	26.9789	30.0194	0.775648	31.6518	29.9552	33.3485	0.865632
	Virginia	51	2000	2000	1354	4660855	29.0505	27.5031	30.5979	0.789485	32.6775	30.9291	34.4259	0.892046
	Virginia	51	1999	1999	1314	4610994	28.4971	26.9563	30.038	0.786146	32.3508	30.5941	34.1074	0.896261
															24.6271
	Vermont	50	2023	2023	128	469313	27.2739	22.5489	31.9989	2.4107	21.128	17.3274	24.9286	1.93909
	Vermont	50	2022	2022	131	466626	28.0739	23.2663	32.8814	2.45283	21.3713	17.5912	25.1515	1.92866
	Vermont	50	2021	2021	107	462400	23.1401	18.7555	27.5247	2.23704	18.5845	14.9141	22.255	1.87268
	Vermont	50	2020	2020	125	445637	28.0497	23.1324	32.9671	2.50884	21.4654	17.5673	25.3634	1.9888
	Vermont	50	2019	2019	110	444144	24.7667	20.1384	29.3951	2.36142	19.1571	15.435	22.8792	1.89904
	Vermont	50	2018	2018	117	443107	26.4045	21.6199	31.189	2.44109	20.8333	16.9154	24.7512	1.99894
	Vermont	50	2017	2017	129	439979	29.3196	24.2599	34.3792	2.58145	23.803	19.5182	28.0878	2.18614
	Vermont	50	2016	2016	140	438323	31.9399	26.6491	37.2308	2.69942	25.5744	21.1939	29.955	2.23498
	Vermont	50	2015	2015	132	438191	30.1239	24.9848	35.2629	2.62194	24.7205	20.3705	29.0705	2.21938
	Vermont	50	2014	2014	112	437431	25.604	20.8621	30.346	2.41935	21.0614	17.0764	25.0464	2.03318
	Vermont	50	2013	2013	114	436977	26.0883	21.2993	30.8774	2.4434	22.0747	17.9272	26.2221	2.11605
	Vermont	50	2012	2012	109	435737	25.0151	20.3189	29.7113	2.39601	20.8468	16.8715	24.822	2.02819
	Vermont	50	2011	2011	107	434230	24.6413	19.9723	29.3104	2.38217	21.9554	17.7036	26.2071	2.16926
	Vermont	50	2010	2010	127	431635	29.423	24.3057	34.5403	2.61087	25.8713	21.3124	30.4303	2.32598
	Vermont	50	2009	2009	102	429236	23.7632	19.1515	28.3748	2.3529	21.069	16.9263	25.2117	2.11362
	Vermont	50	2008	2008	115	426435	26.9678	22.0388	31.8967	2.51476	24.9616	20.361	29.5621	2.34723
	Vermont	50	2007	2007	130	423427	30.7019	25.4241	35.9796	2.69273	28.2377	23.3367	33.1387	2.50052
	Vermont	50	2006	2006	114	420595	27.1045	22.1289	32.08	2.53857	25.1259	20.484	29.7678	2.3683
	Vermont	50	2005	2005	122	417372	29.2305	24.0436	34.4175	2.64641	27.8672	22.8981	32.8364	2.53526
	Vermont	50	2004	2004	125	414933	30.1253	24.8441	35.4066	2.69449	28.7465	23.6866	33.8064	2.58157
	Vermont	50	2003	2003	118	412557	28.6021	23.4414	33.7629	2.63304	27.5965	22.5986	32.5944	2.54993
	Vermont	50	2002	2002	146	410411	35.5741	29.8036	41.3446	2.94413	34.8611	29.1942	40.5279	2.89126
	Vermont	50	2001	2001	129	407338	31.669	26.204	37.1341	2.7883	31.4783	26.038	36.9186	2.77566
	Vermont	50	2000	2000	131	404718	32.3682	26.8253	37.9111	2.82802	32.3917	26.8389	37.9445	2.83306
	Vermont	50	1999	1999	137	401296	34.1394	28.4226	39.8562	2.91672	34.5355	28.7484	40.3226	2.95261
															25.0127
	Utah	49	2023	2023	365	2084748	17.5081	15.7119	19.3043	0.916416	18.6629	16.7194	20.6065	0.991601
	Utah	49	2022	2022	325	2045301	15.8901	14.1625	17.6177	0.881423	17.0733	15.1969	18.9498	0.957388
	Utah	49	2021	2021	288	2011570	14.3172	12.6636	15.9707	0.843648	15.3624	13.5572	17.1676	0.921043
	Utah	49	2020	2020	299	1953255	15.3078	13.5726	17.0429	0.885272	15.9588	14.1281	17.7894	0.934004
	Utah	49	2019	2019	326	1912695	17.044	15.1938	18.8942	0.943981	17.9619	15.9873	19.9365	1.00744
	Utah	49	2018	2018	269	1872333	14.3671	12.6502	16.084	0.875978	15.1586	13.3232	16.9939	0.936413
	Utah	49	2017	2017	277	1829473	15.141	13.3579	16.924	0.909733	16.3483	14.3969	18.2997	0.995604
	Utah	49	2016	2016	286	1786161	16.012	14.1562	17.8677	0.946809	17.3512	15.3138	19.3887	1.03952
	Utah	49	2015	2015	281	1743101	16.1207	14.2358	18.0056	0.96168	17.8196	15.7068	19.9324	1.07798
	Utah	49	2014	2014	275	1705399	16.1253	14.2194	18.0311	0.97239	18.2142	16.0363	20.3921	1.11119
	Utah	49	2013	2013	254	1671971	15.1917	13.3234	17.0599	0.953209	16.8588	14.7581	18.9594	1.07175
	Utah	49	2012	2012	240	1640328	14.6312	12.7801	16.4823	0.944441	16.4547	14.3479	18.5614	1.07489
	Utah	49	2011	2011	251	1609727	15.5927	13.6637	17.5217	0.984203	17.7687	15.5471	19.9902	1.13345
	Utah	49	2010	2010	251	1574829	15.9382	13.9665	17.91	1.00601	18.5111	16.1974	20.8248	1.18046
	Utah	49	2009	2009	263	1546194	17.0095	14.9538	19.0653	1.04885	19.7732	17.3602	22.1862	1.23111
	Utah	49	2008	2008	228	1506195	15.1375	13.1726	17.1024	1.0025	17.7723	15.4431	20.1015	1.18836
	Utah	49	2007	2007	244	1462233	16.6868	14.593	18.7806	1.06826	19.6393	17.1548	22.1238	1.26761
	Utah	49	2006	2006	245	1413142	17.3373	15.1663	19.5082	1.10764	20.2413	17.6869	22.7958	1.30329
	Utah	49	2005	2005	238	1363106	17.4601	15.2419	19.6784	1.13177	20.7868	18.1303	23.4434	1.35538
	Utah	49	2004	2004	212	1320882	16.0499	13.8894	18.2104	1.10231	19.3438	16.7257	21.9619	1.33577
	Utah	49	2003	2003	241	1286277	18.7362	16.3707	21.1018	1.20691	22.5077	19.6545	25.3609	1.45573
	Utah	49	2002	2002	250	1257574	19.8795	17.4153	22.3438	1.25729	23.853	20.8851	26.8209	1.51424
	Utah	49	2001	2001	214	1228383	17.4213	15.0871	19.7554	1.19089	21.1003	18.2642	23.9364	1.44698
	Utah	49	2000	2000	274	1197040	22.8898	20.1795	25.6001	1.38282	27.7235	24.4335	31.0135	1.67857
	Utah	49	1999	1999	243	1177613	20.635	18.0404	23.2295	1.32373	24.8585	21.7228	27.9943	1.59988
															19.0842
	Texas	48	2023	2023	4470	19976082	22.3768	21.7208	23.0328	0.334691	21.9008	21.2489	22.5527	0.332604
	Texas	48	2022	2022	4352	19546901	22.2644	21.6029	22.9259	0.337494	21.8393	21.1811	22.4975	0.335816
	Texas	48	2021	2021	4294	19201801	22.3625	21.6936	23.0314	0.341263	22.2646	21.5851	22.9441	0.346686
	Texas	48	2020	2020	4102	19087071	21.491	20.8333	22.1487	0.335551	20.8874	20.2385	21.5364	0.331106
	Texas	48	2019	2019	4095	18782771	21.8019	21.1341	22.4697	0.340696	21.518	20.849	22.1869	0.34131
	Texas	48	2018	2018	3932	18507667	21.2452	20.5812	21.9093	0.338809	21.1755	20.5029	21.8481	0.343178
	Texas	48	2017	2017	3882	18170130	21.3647	20.6926	22.0368	0.342902	21.429	20.7434	22.1146	0.34981
	Texas	48	2016	2016	3908	17800287	21.9547	21.2664	22.643	0.351197	22.1344	21.4285	22.8403	0.360142
	Texas	48	2015	2015	3707	17485690	21.2002	20.5177	21.8827	0.3482	21.6642	20.9548	22.3735	0.361915
	Texas	48	2014	2014	3599	17093662	21.0546	20.3667	21.7425	0.350959	21.7511	21.0283	22.4739	0.368776
	Texas	48	2013	2013	3602	16692444	21.5786	20.8739	22.2833	0.359544	22.6701	21.9184	23.4218	0.383529
	Texas	48	2012	2012	3551	16390540	21.6649	20.9523	22.3775	0.363565	22.9308	22.1648	23.6967	0.390784
	Texas	48	2011	2011	3507	16083645	21.8048	21.0831	22.5264	0.3682	23.4767	22.6876	24.2657	0.40258
	Texas	48	2010	2010	3523	15706768	22.4298	21.6891	23.1705	0.377894	24.5879	23.7645	25.4114	0.420114
	Texas	48	2009	2009	3391	15460294	21.9336	21.1954	22.6719	0.376657	24.1373	23.3138	24.9608	0.420135
	Texas	48	2008	2008	3371	15121594	22.2926	21.5401	23.0452	0.383956	24.9396	24.0875	25.7917	0.434751
	Texas	48	2007	2007	3392	14788973	22.936	22.1641	23.7079	0.393813	25.7834	24.906	26.6609	0.447673
	Texas	48	2006	2006	3375	14448933	23.3581	22.5701	24.1462	0.402069	26.5011	25.5983	27.4039	0.460622
	Texas	48	2005	2005	3198	14052824	22.757	21.9683	23.5457	0.402416	26.0908	25.1784	27.0033	0.465528
	Texas	48	2004	2004	3194	13765169	23.2035	22.3988	24.0082	0.410569	26.825	25.8869	27.763	0.4786
	Texas	48	2003	2003	3293	13511001	24.3727	23.5403	25.2052	0.424726	28.4237	27.4462	29.4012	0.498732
	Texas	48	2002	2002	3359	13289582	25.2754	24.4207	26.1302	0.436108	29.4942	28.4904	30.498	0.512141
	Texas	48	2001	2001	3292	13056316	25.2139	24.3525	26.0752	0.43945	29.6762	28.6576	30.6949	0.51971
	Texas	48	2000	2000	3229	12766180	25.2934	24.421	26.1658	0.445116	29.8147	28.7821	30.8472	0.526805
	Texas	48	1999	1999	3289	12570920	26.1636	25.2694	27.0577	0.45621	30.8266	29.7692	31.884	0.539498
															24.5097
	Tennessee	47	2023	2023	1419	4921249	28.8341	27.3339	30.3344	0.765448	24.8892	23.5629	26.2155	0.676688
	Tennessee	47	2022	2022	1337	4869062	27.4591	25.9872	28.931	0.750966	23.6077	22.3144	24.9009	0.659816
	Tennessee	47	2021	2021	1278	4817462	26.5285	25.074	27.983	0.742074	23.1668	21.8665	24.467	0.663386
	Tennessee	47	2020	2020	1243	4761823	26.1034	24.6523	27.5546	0.740393	22.5222	21.2437	23.8007	0.652299
	Tennessee	47	2019	2019	1289	4706683	27.3866	25.8915	28.8817	0.762801	23.7825	22.4583	25.1068	0.675644
	Tennessee	47	2018	2018	1220	4650000	26.2366	24.7643	27.7088	0.751151	22.8513	21.5456	24.157	0.666171
	Tennessee	47	2017	2017	1257	4595809	27.351	25.839	28.863	0.771446	23.5933	22.2649	24.9218	0.677765
	Tennessee	47	2016	2016	1227	4531532	27.0769	25.5619	28.592	0.772996	23.9116	22.5501	25.2731	0.694643
	Tennessee	47	2015	2015	1223	4476120	27.3228	25.7914	28.8541	0.781289	24.4819	23.0863	25.8775	0.712034
	Tennessee	47	2014	2014	1157	4423170	26.1577	24.6504	27.665	0.769012	23.597	22.2158	24.9781	0.704673
	Tennessee	47	2013	2013	1230	4374471	28.1177	26.5463	29.6891	0.801728	25.7544	24.293	27.2158	0.745591
	Tennessee	47	2012	2012	1220	4337999	28.1236	26.5454	29.7017	0.805175	26.1414	24.654	27.6289	0.758903
	Tennessee	47	2011	2011	1268	4297304	29.5069	27.8827	31.131	0.828636	27.6123	26.0731	29.1516	0.785339
	Tennessee	47	2010	2010	1225	4243740	28.866	27.2495	30.4825	0.824744	27.3275	25.7802	28.8749	0.789475
	Tennessee	47	2009	2009	1211	4209780	28.7663	27.1461	30.3865	0.826633	27.6343	26.0619	29.2068	0.802281
	Tennessee	47	2008	2008	1246	4163865	29.9241	28.2626	31.5857	0.847739	29.1581	27.5251	30.791	0.833137
	Tennessee	47	2007	2007	1243	4108718	30.2527	28.5709	31.9346	0.858083	29.5454	27.89	31.2009	0.844602
	Tennessee	47	2006	2006	1139	4045691	28.1534	26.5184	29.7884	0.834198	28.0554	26.4156	29.6952	0.836626
	Tennessee	47	2005	2005	1174	3964079	29.616	27.9218	31.3101	0.864354	29.8093	28.0948	31.5237	0.874727
	Tennessee	47	2004	2004	1173	3901894	30.0623	28.3419	31.7827	0.877755	30.4029	28.6543	32.1515	0.892118
	Tennessee	47	2003	2003	1218	3853118	31.6108	29.8355	33.386	0.905756	32.1119	30.3012	33.9225	0.923801
	Tennessee	47	2002	2002	1160	3813319	30.4197	28.6691	32.1703	0.893153	31.063	29.2701	32.8559	0.914754
	Tennessee	47	2001	2001	1252	3779943	33.1222	31.2875	34.9569	0.936089	33.9091	32.0273	35.7909	0.960105
	Tennessee	47	2000	2000	1258	3741906	33.6192	31.7614	35.477	0.947867	34.7759	32.8514	36.7005	0.981917
	Tennessee	47	1999	1999	1083	3708799	29.2008	27.4617	30.94	0.887321	30.3181	28.5098	32.1264	0.922612
															27.2009
	South Dakota	46	2023	2023	182	611993	29.7389	25.4183	34.0595	2.20439	24.1812	20.5451	27.8172	1.85513
	South Dakota	46	2022	2022	143	603630	23.69	19.8071	27.5729	1.98106	19.4368	16.1369	22.7368	1.68366
	South Dakota	46	2021	2021	162	591725	27.3776	23.1616	31.5935	2.15099	22.1851	18.6698	25.7005	1.79353
	South Dakota	46	2020	2020	156	591195	26.3872	22.2464	30.5281	2.11267	20.3589	17.078	23.6398	1.67392
	South Dakota	46	2019	2019	152	585162	25.9757	21.8462	30.1053	2.10691	21.1432	17.6592	24.6272	1.77755
	South Dakota	46	2018	2018	168	581200	28.9057	24.5347	33.2768	2.23012	23.3995	19.7431	27.0558	1.86548
	South Dakota	46	2017	2017	161	572007	28.1465	23.7987	32.4943	2.21826	22.3998	18.8477	25.9518	1.81226
	South Dakota	46	2016	2016	163	567562	28.7193	24.3104	33.1283	2.24947	23.4431	19.7222	27.1639	1.8984
	South Dakota	46	2015	2015	168	562471	29.8682	25.3516	34.3848	2.30438	24.2716	20.5138	28.0294	1.91724
	South Dakota	46	2014	2014	185	557090	33.2083	28.4229	37.9937	2.44152	27.0881	23.0977	31.0785	2.03594
	South Dakota	46	2013	2013	169	551921	30.6203	26.0037	35.2369	2.35541	25.8279	21.8488	29.8069	2.03013
	South Dakota	46	2012	2012	166	545573	30.4267	25.798	35.0554	2.36157	25.2843	21.3659	29.2028	1.99921
	South Dakota	46	2011	2011	137	537912	25.4688	21.204	29.7337	2.17595	21.5164	17.8684	25.1644	1.86121
	South Dakota	46	2010	2010	168	529844	31.7074	26.9127	36.5022	2.44628	26.3214	22.2781	30.3647	2.06293
	South Dakota	46	2009	2009	156	524072	29.7669	25.0957	34.4381	2.38326	24.7707	20.8344	28.7071	2.00833
	South Dakota	46	2008	2008	156	517044	30.1715	25.4368	34.9062	2.41565	25.6509	21.5731	29.7286	2.08048
	South Dakota	46	2007	2007	167	510332	32.7238	27.7606	37.687	2.53224	27.576	23.3425	31.8095	2.15994
	South Dakota	46	2006	2006	150	501273	29.9238	25.135	34.7126	2.44327	24.9533	20.9254	28.9812	2.05506
	South Dakota	46	2005	2005	177	494352	35.8044	30.5296	41.0793	2.69123	30.5348	25.9941	35.0755	2.31668
	South Dakota	46	2004	2004	152	488819	31.0954	26.1519	36.0388	2.52217	25.7953	21.657	29.9335	2.11136
	South Dakota	46	2003	2003	176	483277	36.418	31.0376	41.7985	2.74511	30.9401	26.3322	35.548	2.35096
	South Dakota	46	2002	2002	169	480113	35.2	29.893	40.5071	2.7077	29.6569	25.1462	34.1676	2.30137
	South Dakota	46	2001	2001	178	477461	37.2805	31.8037	42.7573	2.79429	31.8478	27.1299	36.5657	2.40707
	South Dakota	46	2000	2000	208	474561	43.83	37.8734	49.7865	3.03906	37.7846	32.6054	42.9638	2.64245
	South Dakota	46	1999	1999	185	469979	39.3635	33.6911	45.0358	2.89406	33.6512	28.7609	38.5415	2.49505
															26.0008
	South Carolina	45	2023	2023	917	3742539	24.5021	22.9162	26.088	0.80913	19.7861	18.4651	21.107	0.67395
	South Carolina	45	2022	2022	1035	3670482	28.1979	26.48	29.9159	0.87649	22.9908	21.5484	24.4332	0.735909
	South Carolina	45	2021	2021	927	3609065	25.6853	24.0318	27.3388	0.843617	21.9415	20.4828	23.4001	0.744218
	South Carolina	45	2020	2020	918	3631363	25.2798	23.6444	26.9151	0.834357	20.96	19.5647	22.3552	0.711863
	South Carolina	45	2019	2019	887	3570132	24.845	23.21	26.4801	0.834214	20.8325	19.4226	22.2425	0.719356
	South Carolina	45	2018	2018	842	3509959	23.9889	22.3685	25.6092	0.826712	20.3309	18.9248	21.7369	0.717355
	South Carolina	45	2017	2017	876	3451907	25.3773	23.6967	27.0578	0.857419	21.3436	19.893	22.7943	0.740145
	South Carolina	45	2016	2016	879	3394962	25.8913	24.1797	27.603	0.873292	22.3778	20.8603	23.8952	0.774214
	South Carolina	45	2015	2015	863	3327434	25.9359	24.2055	27.6663	0.882868	22.8338	21.2768	24.3908	0.794401
	South Carolina	45	2014	2014	848	3265758	25.9664	24.2187	27.7141	0.89169	22.708	21.1476	24.2684	0.796132
	South Carolina	45	2013	2013	825	3206985	25.7251	23.9697	27.4805	0.895633	23.1082	21.5023	24.7141	0.819333
	South Carolina	45	2012	2012	824	3159222	26.0824	24.3015	27.8633	0.908622	23.7605	22.1095	25.4114	0.84233
	South Carolina	45	2011	2011	840	3117923	26.941	25.1191	28.7629	0.929553	24.9436	23.2299	26.6573	0.874337
	South Carolina	45	2010	2010	900	3068445	29.3308	27.4145	31.2471	0.977694	27.1248	25.3262	28.9233	0.917621
	South Carolina	45	2009	2009	785	3037889	25.8403	24.0326	27.648	0.92228	24.5086	22.7714	26.2457	0.886298
	South Carolina	45	2008	2008	814	2992330	27.2029	25.3341	29.0717	0.953461	26.321	24.4936	28.1483	0.932314
	South Carolina	45	2007	2007	779	2928785	26.5981	24.7302	28.4659	0.952974	25.6717	23.8486	27.4948	0.93016
	South Carolina	45	2006	2006	839	2867036	29.2637	27.2835	31.2438	1.01029	28.4899	26.5433	30.4366	0.993204
	South Carolina	45	2005	2005	815	2796552	29.143	27.1422	31.1439	1.02084	29.2983	27.2699	31.3267	1.03489
	South Carolina	45	2004	2004	749	2746617	27.2699	25.3169	29.2229	0.996421	27.5469	25.5595	29.5344	1.01401
	South Carolina	45	2003	2003	823	2700137	30.4799	28.3975	32.5624	1.06246	30.9922	28.8603	33.1241	1.08772
	South Carolina	45	2002	2002	811	2664292	30.4396	28.3446	32.5346	1.06888	31.2098	29.049	33.3706	1.10245
	South Carolina	45	2001	2001	818	2630750	31.0938	28.9629	33.2246	1.08717	32.2649	30.0441	34.4858	1.13311
	South Carolina	45	2000	2000	850	2594520	32.7614	30.5589	34.9638	1.12371	34.3245	32.0065	36.6424	1.18262
	South Carolina	45	1999	1999	818	2564228	31.9004	29.7143	34.0866	1.11537	33.5518	31.2411	35.8626	1.17896
															25.5689
	Rhode Island	44	2023	2023	171	783313	21.8304	18.5583	25.1024	1.66941	17.0176	14.4135	19.6216	1.3286
	Rhode Island	44	2022	2022	159	777895	20.4398	17.2627	23.6169	1.62098	16.2973	13.6925	18.9021	1.32899
	Rhode Island	44	2021	2021	156	776229	20.0972	16.9434	23.2509	1.60906	16.5726	13.9091	19.2361	1.35894
	Rhode Island	44	2020	2020	168	747828	22.4651	19.068	25.8622	1.73322	18.033	15.2292	20.8367	1.43048
	Rhode Island	44	2019	2019	174	745315	23.3458	19.8769	26.8147	1.76984	19.0403	16.1343	21.9464	1.4827
	Rhode Island	44	2018	2018	181	741199	24.4199	20.8623	27.9775	1.81512	19.6286	16.7041	22.5532	1.49212
	Rhode Island	44	2017	2017	147	738571	19.9033	16.6858	23.1208	1.6416	16.432	13.6882	19.1757	1.39986
	Rhode Island	44	2016	2016	176	733669	23.989	20.4449	27.5332	1.80824	19.341	16.4065	22.2754	1.49716
	Rhode Island	44	2015	2015	173	730276	23.6897	20.1595	27.2198	1.80109	20.0376	16.9677	23.1074	1.56624
	Rhode Island	44	2014	2014	186	725191	25.6484	21.9624	29.3345	1.88063	21.0421	17.9388	24.1454	1.58331
	Rhode Island	44	2013	2013	178	719570	24.737	21.1029	28.3711	1.85412	20.2809	17.2219	23.34	1.56075
	Rhode Island	44	2012	2012	195	713357	27.3355	23.4988	31.1723	1.95754	22.232	19.0336	25.4303	1.63181
	Rhode Island	44	2011	2011	195	710667	27.439	23.5877	31.2903	1.96495	23.2413	19.9072	26.5755	1.70108
	Rhode Island	44	2010	2010	211	708642	29.7753	25.7576	33.7929	2.04981	25.6462	22.1241	29.1683	1.79699
	Rhode Island	44	2009	2009	205	707382	28.9801	25.0129	32.9473	2.02406	24.6162	21.1879	28.0444	1.74909
	Rhode Island	44	2008	2008	196	706795	27.7308	23.8485	31.6131	1.98077	23.4055	20.075	26.7361	1.69928
	Rhode Island	44	2007	2007	200	706570	28.3058	24.3828	32.2287	2.00152	24.9869	21.4745	28.4993	1.79204
	Rhode Island	44	2006	2006	190	708960	26.7998	22.9891	30.6106	1.94426	23.3726	20.0106	26.7346	1.7153
	Rhode Island	44	2005	2005	222	710389	31.2505	27.1396	35.3614	2.0974	26.934	23.3555	30.5125	1.82577
	Rhode Island	44	2004	2004	226	713178	31.6891	27.5576	35.8207	2.10793	27.7559	24.104	31.4079	1.86323
	Rhode Island	44	2003	2003	237	709864	33.3867	29.136	37.6373	2.1687	29.6844	25.8754	33.4933	1.94333
	Rhode Island	44	2002	2002	264	704549	37.4708	32.9507	41.9909	2.30617	33.1915	29.1622	37.2209	2.0558
	Rhode Island	44	2001	2001	248	698856	35.4866	31.0699	39.9032	2.2534	31.99	27.9844	35.9957	2.0437
	Rhode Island	44	2000	2000	259	693890	37.3258	32.7799	41.8717	2.31931	33.1277	29.0721	37.1832	2.06916
	Rhode Island	44	1999	1999	278	690314	40.2715	35.5375	45.0056	2.41533	36.0859	31.8195	40.3524	2.17675
															23.5997
	Pennsylvania	42	2023	2023	2433	9168484	26.5366	25.4821	27.591	0.537989	20.7386	19.89	21.5873	0.432984
	Pennsylvania	42	2022	2022	2360	9147165	25.8003	24.7594	26.8413	0.531092	20.0419	19.2109	20.8729	0.423979
	Pennsylvania	42	2021	2021	2371	9156034	25.8955	24.8531	26.9378	0.531812	20.6467	19.7928	21.5006	0.435668
	Pennsylvania	42	2020	2020	2400	9040207	26.5481	25.4859	27.6102	0.54191	20.6666	19.8162	21.5169	0.433854
	Pennsylvania	42	2019	2019	2366	9025217	26.2154	25.1591	27.2718	0.538952	20.5906	19.7375	21.4436	0.435213
	Pennsylvania	42	2018	2018	2495	8997867	27.7288	26.6407	28.8169	0.555131	21.8484	20.968	22.7287	0.44916
	Pennsylvania	42	2017	2017	2517	8964643	28.077	26.9801	29.1739	0.55964	22.1266	21.2405	23.0127	0.452096
	Pennsylvania	42	2016	2016	2565	8921824	28.7497	27.6371	29.8623	0.567662	23.01	22.0963	23.9237	0.466155
	Pennsylvania	42	2015	2015	2610	8907696	29.3005	28.1764	30.4246	0.573528	23.6727	22.743	24.6024	0.474335
	Pennsylvania	42	2014	2014	2571	8859907	29.0184	27.8967	30.1401	0.572298	23.4466	22.5201	24.3732	0.472726
	Pennsylvania	42	2013	2013	2649	8813592	30.0559	28.9113	31.2004	0.583967	24.4711	23.5211	25.4211	0.484712
	Pennsylvania	42	2012	2012	2643	8760382	30.1699	29.0197	31.3201	0.586848	24.693	23.7356	25.6503	0.488442
	Pennsylvania	42	2011	2011	2620	8715337	30.0619	28.9108	31.2131	0.587309	24.726	23.7651	25.6869	0.490246
	Pennsylvania	42	2010	2010	2790	8648843	32.2587	31.0616	33.4557	0.610723	26.6457	25.6452	27.6462	0.510455
	Pennsylvania	42	2009	2009	2797	8609516	32.4873	31.2833	33.6913	0.614282	27.0656	26.0527	28.0785	0.516792
	Pennsylvania	42	2008	2008	2817	8559404	32.9112	31.6958	34.1265	0.620083	27.5494	26.5237	28.5751	0.523322
	Pennsylvania	42	2007	2007	2864	8509745	33.6555	32.4229	34.8881	0.628883	28.2667	27.2235	29.3099	0.532241
	Pennsylvania	42	2006	2006	2921	8459604	34.5288	33.2766	35.781	0.638875	29.0726	28.0119	30.1333	0.541165
	Pennsylvania	42	2005	2005	2942	8406531	34.9966	33.732	36.2612	0.645215	29.631	28.5544	30.7076	0.549284
	Pennsylvania	42	2004	2004	2989	8364350	35.735	34.4539	37.0161	0.653628	30.3373	29.2451	31.4294	0.557217
	Pennsylvania	42	2003	2003	3108	8330919	37.3068	35.9952	38.6184	0.669187	31.7578	30.6369	32.8786	0.57186
	Pennsylvania	42	2002	2002	3213	8295745	38.7307	37.3915	40.0699	0.683282	33.2252	32.072	34.3784	0.588353
	Pennsylvania	42	2001	2001	3351	8271911	40.5106	39.139	41.8822	0.699812	35.047	33.8558	36.2381	0.60774
	Pennsylvania	42	2000	2000	3417	8264384	41.3461	39.9598	42.7324	0.707314	35.7422	34.5397	36.9446	0.613488
	Pennsylvania	42	1999	1999	3470	8247805	42.0718	40.6719	43.4717	0.714211	36.6311	35.4079	37.8543	0.624098
															26.466
	Oregon	41	2023	2023	663	3043760	21.7823	20.1242	23.4403	0.845953	18.6391	17.1847	20.0934	0.742018
	Oregon	41	2022	2022	698	3032338	23.0185	21.3109	24.7262	0.871265	19.3412	17.8787	20.8038	0.746181
	Oregon	41	2021	2021	701	3026847	23.1594	21.445	24.8739	0.874719	20.2116	18.6818	21.7414	0.780499
	Oregon	41	2020	2020	644	3020536	21.3207	19.674	22.9674	0.840154	17.9818	16.5656	19.3981	0.722565
	Oregon	41	2019	2019	694	2988153	23.225	21.4971	24.953	0.881611	19.7288	18.2319	21.2258	0.763749
	Oregon	41	2018	2018	673	2952102	22.7973	21.0749	24.5197	0.878772	19.4676	17.9676	20.9675	0.765269
	Oregon	41	2017	2017	667	2906075	22.9519	21.2101	24.6938	0.888702	20.0472	18.4942	21.6003	0.79235
	Oregon	41	2016	2016	681	2859160	23.8182	22.0293	25.6071	0.912715	20.8998	19.2964	22.5032	0.818053
	Oregon	41	2015	2015	675	2802337	24.087	22.2699	25.9042	0.927111	20.8242	19.2186	22.4297	0.819171
	Oregon	41	2014	2014	623	2747338	22.6765	20.8958	24.4572	0.908515	20.0701	18.4595	21.6806	0.821698
	Oregon	41	2013	2013	683	2705032	25.2492	23.3556	27.1429	0.966135	22.2237	20.5229	23.9245	0.867746
	Oregon	41	2012	2012	639	2673725	23.8992	22.0462	25.7523	0.945439	21.3848	19.695	23.0746	0.862144
	Oregon	41	2011	2011	728	2643549	27.5387	25.5383	29.5392	1.02065	25.0655	23.2132	26.9179	0.945085
	Oregon	41	2010	2010	655	2605843	25.1358	23.2108	27.0608	0.982138	22.9927	21.2052	24.7802	0.911976
	Oregon	41	2009	2009	654	2582795	25.3214	23.3807	27.2621	0.990145	23.2106	21.4089	25.0124	0.919276
	Oregon	41	2008	2008	669	2546205	26.2744	24.2834	28.2654	1.01583	24.4626	22.5898	26.3353	0.955472
	Oregon	41	2007	2007	715	2507570	28.5137	26.4236	30.6037	1.06635	26.7087	24.7348	28.6826	1.0071
	Oregon	41	2006	2006	629	2463702	25.5307	23.5355	27.5259	1.01798	23.8593	21.9814	25.7372	0.958094
	Oregon	41	2005	2005	671	2414431	27.7912	25.6884	29.894	1.07287	26.2217	24.2273	28.216	1.0175
	Oregon	41	2004	2004	645	2373907	27.1704	25.0735	29.2673	1.06983	25.8265	23.8256	27.8274	1.02087
	Oregon	41	2003	2003	686	2347772	29.2192	27.0326	31.4058	1.11559	28.1214	26.0106	30.2322	1.07694
	Oregon	41	2002	2002	661	2317719	28.5194	26.3452	30.6936	1.10928	27.6424	25.5306	29.7543	1.07748
	Oregon	41	2001	2001	705	2281917	30.8951	28.6145	33.1757	1.16358	30.1231	27.896	32.3501	1.13627
	Oregon	41	2000	2000	621	2246989	27.637	25.4633	29.8107	1.10903	27.1017	24.9681	29.2353	1.08858
	Oregon	41	1999	1999	689	2227784	30.9276	28.6182	33.237	1.17825	30.4717	28.1948	32.7485	1.16165
															23.3051
	Oklahoma	40	2023	2023	810	2689460	30.1176	28.0435	32.1917	1.05822	26.2091	24.3698	28.0483	0.938393
	Oklahoma	40	2022	2022	784	2660054	29.4731	27.41	31.5362	1.05261	25.3838	23.5733	27.1944	0.923762
	Oklahoma	40	2021	2021	787	2641438	29.7944	27.7127	31.876	1.06205	25.8063	23.9665	27.6461	0.938686
	Oklahoma	40	2020	2020	815	2645289	30.8095	28.6942	32.9247	1.07921	26.2626	24.423	28.1022	0.938555
	Oklahoma	40	2019	2019	730	2623828	27.8219	25.8037	29.8402	1.02974	24.161	22.3733	25.9486	0.912084
	Oklahoma	40	2018	2018	748	2606913	28.6929	26.6367	30.7492	1.04912	24.8385	23.027	26.6499	0.924225
	Oklahoma	40	2017	2017	776	2591703	29.9417	27.835	32.0484	1.07484	26.3421	24.4554	28.2289	0.962636
	Oklahoma	40	2016	2016	762	2578852	29.548	27.45	31.646	1.07041	26.3948	24.4874	28.3021	0.973123
	Oklahoma	40	2015	2015	814	2560280	31.7934	29.6093	33.9775	1.11436	28.1418	26.1803	30.1033	1.00076
	Oklahoma	40	2014	2014	720	2533049	28.4242	26.348	30.5005	1.05931	25.4901	23.6012	27.379	0.963734
	Oklahoma	40	2013	2013	749	2510605	29.8334	27.6969	31.97	1.09009	26.9595	25.0037	28.9152	0.997846
	Oklahoma	40	2012	2012	758	2485953	30.4913	28.3206	32.662	1.10749	27.8812	25.8753	29.8871	1.02342
	Oklahoma	40	2011	2011	700	2467263	28.3715	26.2697	30.4733	1.07234	25.862	23.9255	27.7985	0.988025
	Oklahoma	40	2010	2010	671	2440499	27.4944	25.414	29.5747	1.06141	25.5933	23.6416	27.545	0.995767
	Oklahoma	40	2009	2009	730	2415012	30.2276	28.0348	32.4204	1.11877	28.1679	26.1068	30.229	1.05161
	Oklahoma	40	2008	2008	749	2379513	31.477	29.2227	33.7313	1.15015	29.3339	27.2206	31.4472	1.07819
	Oklahoma	40	2007	2007	698	2350091	29.701	27.4975	31.9044	1.1242	27.8642	25.787	29.9414	1.05978
	Oklahoma	40	2006	2006	661	2317614	28.5207	26.3464	30.695	1.10933	26.7649	24.7167	28.8132	1.04502
	Oklahoma	40	2005	2005	729	2279591	31.9794	29.658	34.3009	1.18442	30.1562	27.9599	32.3525	1.12057
	Oklahoma	40	2004	2004	719	2257134	31.8546	29.5261	34.183	1.18797	30.0997	27.8944	32.305	1.12516
	Oklahoma	40	2003	2003	717	2238915	32.0244	29.6803	34.3686	1.19597	30.3319	28.1078	32.5561	1.13475
	Oklahoma	40	2002	2002	734	2226600	32.9651	30.5802	35.3499	1.21676	31.2374	28.9756	33.4991	1.15394
	Oklahoma	40	2001	2001	736	2212268	33.269	30.8655	35.6726	1.22631	31.6455	29.3583	33.9328	1.16696
	Oklahoma	40	2000	2000	778	2201209	35.3442	32.8606	37.8278	1.26715	33.5799	31.2189	35.9409	1.2046
	Oklahoma	40	1999	1999	739	2187951	33.7759	31.3407	36.2111	1.24247	32.254	29.9269	34.5811	1.1873
															27.8705
	Ohio	39	2023	2023	2091	8162870	25.616	24.518	26.714	0.560188	21.1264	20.197	22.0558	0.474186
	Ohio	39	2022	2022	2101	8124781	25.8592	24.7534	26.9649	0.564159	21.0955	20.1704	22.0205	0.471964
	Ohio	39	2021	2021	2170	8122862	26.7147	25.5907	27.8387	0.573483	22.2848	21.3241	23.2455	0.490165
	Ohio	39	2020	2020	2174	8077042	26.9158	25.7843	28.0472	0.577268	21.9296	20.985	22.8742	0.481931
	Ohio	39	2019	2019	2161	8050770	26.8422	25.7104	27.9739	0.577418	21.7528	20.8152	22.6903	0.478331
	Ohio	39	2018	2018	2222	8027919	27.6784	26.5275	28.8293	0.587177	23.0114	22.0335	23.9894	0.498961
	Ohio	39	2017	2017	2225	7979806	27.8829	26.7243	29.0415	0.591116	23.3243	22.3328	24.3158	0.505875
	Ohio	39	2016	2016	2292	7926716	28.9149	27.7311	30.0987	0.603968	24.2977	23.2834	25.312	0.517506
	Ohio	39	2015	2015	2201	7899614	27.8621	26.6981	29.0261	0.593887	23.6055	22.6016	24.6094	0.512204
	Ohio	39	2014	2014	2284	7856149	29.0728	27.8804	30.2651	0.608329	24.5982	23.5723	25.624	0.52341
	Ohio	39	2013	2013	2280	7812176	29.1852	27.9872	30.3832	0.611217	25.2114	24.1602	26.2626	0.536321
	Ohio	39	2012	2012	2267	7771877	29.1693	27.9685	30.37	0.612632	25.3499	24.2932	26.4066	0.539134
	Ohio	39	2011	2011	2275	7748759	29.3595	28.1531	30.566	0.615543	25.8599	24.7855	26.9342	0.548148
	Ohio	39	2010	2010	2330	7706262	30.2352	29.0075	31.4628	0.626375	27.0096	25.9033	28.1159	0.56444
	Ohio	39	2009	2009	2306	7682817	30.015	28.79	31.2401	0.625042	26.8208	25.7183	27.9234	0.562526
	Ohio	39	2008	2008	2403	7656963	31.3832	30.1284	32.638	0.640207	28.5278	27.3807	29.6749	0.585236
	Ohio	39	2007	2007	2445	7628783	32.0497	30.7793	33.3201	0.648163	29.2832	28.1176	30.4488	0.594677
	Ohio	39	2006	2006	2443	7593165	32.1737	30.8978	33.4495	0.650937	29.7608	28.5768	30.9448	0.604095
	Ohio	39	2005	2005	2372	7553901	31.401	30.1373	32.6647	0.644742	29.4395	28.2521	30.6269	0.605817
	Ohio	39	2004	2004	2477	7516601	32.9537	31.656	34.2515	0.662127	30.9869	29.765	32.2088	0.623418
	Ohio	39	2003	2003	2609	7483202	34.8648	33.5269	36.2026	0.682574	33.0648	31.7948	34.3349	0.64798
	Ohio	39	2002	2002	2549	7451678	34.2071	32.8791	35.535	0.677534	32.7021	31.4318	33.9724	0.648114
	Ohio	39	2001	2001	2640	7429592	35.5336	34.1781	36.8891	0.691571	34.2859	32.9776	35.5941	0.667472
	Ohio	39	2000	2000	2620	7408257	35.3659	34.0117	36.7202	0.690931	34.3642	33.0479	35.6804	0.671558
	Ohio	39	1999	1999	2809	7389311	38.0144	36.6086	39.4202	0.717252	37.1664	35.7913	38.5415	0.701581
															27.0744
	North Dakota	38	2023	2023	130	511626	25.4092	21.0413	29.7771	2.22853	21.112	17.3873	24.8367	1.90037
	North Dakota	38	2022	2022	106	507054	20.9051	16.9253	24.8848	2.03048	16.9847	13.6621	20.3073	1.69522
	North Dakota	38	2021	2021	106	505804	20.9567	16.9672	24.9463	2.0355	18.0664	14.5254	21.6074	1.80663
	North Dakota	38	2020	2020	122	500551	24.3731	20.0481	28.6982	2.20664	20.2477	16.5335	23.962	1.89502
	North Dakota	38	2019	2019	138	499069	27.6515	23.0379	32.265	2.35385	23.5759	19.5368	27.615	2.06076
	North Dakota	38	2018	2018	118	496667	23.7584	19.4716	28.0452	2.18714	20.5412	16.7182	24.3643	1.95053
	North Dakota	38	2017	2017	99	493182	20.0737	16.3149	24.439	2.01749	16.8405	13.5924	20.6308	1.74974
	North Dakota	38	2016	2016	120	490529	24.4634	20.0863	28.8404	2.23319	21.5353	17.5668	25.5039	2.02477
	North Dakota	38	2015	2015	111	487524	22.7681	18.5324	27.0038	2.16105	19.4635	15.7633	23.1638	1.88787
	North Dakota	38	2014	2014	127	477003	26.6246	21.994	31.2552	2.36255	22.9631	18.8882	27.0379	2.079
	North Dakota	38	2013	2013	137	468003	29.2733	24.3714	34.1753	2.50099	24.623	20.402	28.8441	2.15359
	North Dakota	38	2012	2012	112	457627	24.4741	19.9414	29.0067	2.31258	20.3307	16.4728	24.1886	1.96831
	North Dakota	38	2011	2011	131	448833	29.1868	24.1887	34.1849	2.55006	24.7246	20.3998	29.0493	2.2065
	North Dakota	38	2010	2010	143	441700	32.3749	27.0686	37.6813	2.70733	26.9944	22.495	31.4937	2.29559
	North Dakota	38	2009	2009	130	435287	29.8654	24.7314	34.9993	2.61936	24.6985	20.3955	29.0015	2.19541
	North Dakota	38	2008	2008	146	427800	34.1281	28.5922	39.664	2.82446	27.74	23.1882	32.2917	2.32232
	North Dakota	38	2007	2007	126	422601	29.8154	24.6093	35.0214	2.65616	24.7968	20.4123	29.1813	2.23699
	North Dakota	38	2006	2006	146	416099	35.0878	29.3962	40.7794	2.90389	28.4393	23.7708	33.1077	2.38185
	North Dakota	38	2005	2005	151	412698	36.5885	30.7525	42.4245	2.97753	29.1617	24.4521	33.8712	2.40283
	North Dakota	38	2004	2004	128	410528	31.1794	25.7778	36.5809	2.75589	24.8109	20.4599	29.162	2.21993
	North Dakota	38	2003	2003	144	406656	35.4108	29.627	41.1945	2.9509	29.0862	24.2861	33.8863	2.44903
	North Dakota	38	2002	2002	152	406242	37.4161	31.4678	43.3644	3.03485	31.1005	26.0942	36.1068	2.55424
	North Dakota	38	2001	2001	154	406490	37.8853	31.9017	43.869	3.05289	32.008	26.8888	37.1272	2.61185
	North Dakota	38	2000	2000	142	408233	34.7841	29.0628	40.5053	2.91901	29.1747	24.3337	34.0156	2.46987
	North Dakota	38	1999	1999	145	408740	35.4749	29.7007	41.2491	2.94603	30.4688	25.445	35.4927	2.56317
															24.3795
	North Carolina	37	2023	2023	1775	7476679	23.7405	22.636	24.8449	0.563495	20.26	19.2971	21.223	0.491313
	North Carolina	37	2022	2022	1739	7365475	23.6102	22.5005	24.7199	0.566173	20.241	19.2693	21.2128	0.495776
	North Carolina	37	2021	2021	1687	7260238	23.2362	22.1273	24.345	0.565727	20.1773	19.1927	21.162	0.502369
	North Carolina	37	2020	2020	1610	7298944	22.058	20.9805	23.1355	0.549734	18.8986	17.9578	19.8395	0.480026
	North Carolina	37	2019	2019	1661	7196782	23.0798	21.9698	24.1897	0.5663	20.0071	19.0286	20.9856	0.499217
	North Carolina	37	2018	2018	1614	7099141	22.7351	21.626	23.8443	0.565908	19.9346	18.9451	20.9242	0.504863
	North Carolina	37	2017	2017	1567	6998557	22.3903	21.2817	23.4989	0.565622	19.7946	18.7968	20.7924	0.509084
	North Carolina	37	2016	2016	1606	6881834	23.3368	22.1954	24.4782	0.582329	20.675	19.6466	21.7033	0.524662
	North Carolina	37	2015	2015	1678	6764137	24.8073	23.6203	25.9943	0.605597	22.4593	21.3675	23.5511	0.557043
	North Carolina	37	2014	2014	1624	6668527	24.3532	23.1687	25.5377	0.604315	22.1733	21.0791	23.2676	0.558285
	North Carolina	37	2013	2013	1461	6577070	22.2135	21.0745	23.3526	0.581156	20.4675	19.4047	21.5304	0.542259
	North Carolina	37	2012	2012	1553	6493383	23.9167	22.7271	25.1062	0.606897	22.3966	21.2699	23.5233	0.57483
	North Carolina	37	2011	2011	1497	6415046	23.3358	22.1536	24.5179	0.60313	22.2389	21.0994	23.3783	0.581356
	North Carolina	37	2010	2010	1499	6315230	23.7363	22.5346	24.9379	0.613072	23.0611	21.8819	24.2403	0.601623
	North Carolina	37	2009	2009	1512	6246443	24.2058	22.9857	25.4259	0.622505	23.8161	22.6045	25.0276	0.618123
	North Carolina	37	2008	2008	1503	6146705	24.4521	23.2159	25.6883	0.630721	24.2083	22.9748	25.4418	0.629338
	North Carolina	37	2007	2007	1605	6015136	26.6827	25.3773	27.9881	0.666027	26.8034	25.4832	28.1237	0.673584
	North Carolina	37	2006	2006	1521	5873967	25.8939	24.5926	27.1952	0.663947	26.0946	24.775	27.4143	0.673292
	North Carolina	37	2005	2005	1484	5730644	25.8959	24.5783	27.2134	0.672223	26.5561	25.1975	27.9148	0.693195
	North Carolina	37	2004	2004	1522	5626494	27.0506	25.6916	28.4096	0.693377	27.9327	26.5225	29.3429	0.719479
	North Carolina	37	2003	2003	1517	5539187	27.3867	26.0085	28.7649	0.703148	28.3893	26.9546	29.8239	0.731962
	North Carolina	37	2002	2002	1575	5460504	28.8435	27.419	30.268	0.726788	30.2836	28.7827	31.7845	0.76575
	North Carolina	37	2001	2001	1535	5381623	28.523	27.0961	29.9499	0.728016	30.1851	28.6707	31.6994	0.772628
	North Carolina	37	2000	2000	1561	5278445	29.5731	28.106	31.0402	0.748506	31.5372	29.9687	33.1058	0.800275
	North Carolina	37	1999	1999	1515	5225424	28.9929	27.5329	30.4528	0.744877	30.9753	29.4111	32.5394	0.798033
															23.9827
	New York	36	2023	2023	2834	13869973	20.4326	19.6803	21.1849	0.383817	16.7804	16.1486	17.4123	0.322369
	New York	36	2022	2022	2809	13884827	20.2307	19.4826	20.9789	0.381712	16.6498	16.0192	17.2803	0.321711
	New York	36	2021	2021	2898	13979542	20.7303	19.9755	21.4851	0.385085	17.5866	16.932	18.2412	0.333957
	New York	36	2020	2020	2928	13626537	21.4875	20.7092	22.2658	0.3971	17.8728	17.2105	18.5352	0.337935
	New York	36	2019	2019	2915	13662718	21.3354	20.5609	22.11	0.395168	17.9269	17.2627	18.5912	0.3389
	New York	36	2018	2018	2918	13673941	21.3399	20.5656	22.1142	0.395047	18.412	17.73	19.0939	0.347931
	New York	36	2017	2017	3206	13822360	23.1943	22.3914	23.9972	0.409637	20.0973	19.3881	20.8064	0.361816
	New York	36	2016	2016	3074	13659679	22.5042	21.7086	23.2997	0.405893	19.8251	19.1117	20.5385	0.363983
	New York	36	2015	2015	3163	13642561	23.1848	22.3768	23.9928	0.412243	20.5963	19.8667	21.3259	0.372236
	New York	36	2014	2014	3156	13541939	23.3054	22.4923	24.1185	0.414847	20.7573	20.0222	21.4925	0.37508
	New York	36	2013	2013	3235	13428605	24.0904	23.2602	24.9205	0.423552	21.6628	20.9057	22.4198	0.386241
	New York	36	2012	2012	3258	13309461	24.4788	23.6383	25.3194	0.42886	22.2005	21.4289	22.972	0.393636
	New York	36	2011	2011	3326	13193572	25.2092	24.3525	26.066	0.437118	23.0635	22.2709	23.8562	0.404413
	New York	36	2010	2010	3360	13069656	25.7084	24.8391	26.5777	0.443512	23.7828	22.9715	24.594	0.413911
	New York	36	2009	2009	3408	12996038	26.2234	25.3429	27.1038	0.449199	24.4944	23.666	25.3227	0.422611
	New York	36	2008	2008	3447	12903441	26.7138	25.822	27.6056	0.455004	25.0606	24.2191	25.9021	0.429334
	New York	36	2007	2007	3489	12822658	27.2096	26.3068	28.1125	0.460651	25.714	24.8566	26.5714	0.437428
	New York	36	2006	2006	3556	12777840	27.8294	26.9147	28.7441	0.466685	26.5586	25.6825	27.4347	0.447011
	New York	36	2005	2005	3531	12762394	27.6672	26.7546	28.5798	0.465604	26.4969	25.6207	27.3731	0.447038
	New York	36	2004	2004	3803	12749523	29.8286	28.8805	30.7766	0.483692	28.8647	27.9458	29.7835	0.468804
	New York	36	2003	2003	3968	12719393	31.1965	30.2258	32.1671	0.495244	30.4006	29.4537	31.3476	0.483143
	New York	36	2002	2002	4098	12668166	32.3488	31.3584	33.3392	0.505327	31.8086	30.8341	32.7831	0.497183
	New York	36	2001	2001	4106	12607991	32.5666	31.5705	33.5628	0.508234	32.2613	31.2742	33.2484	0.50361
	New York	36	2000	2000	4263	12520897	34.0471	33.025	35.0691	0.521461	33.9502	32.9308	34.9695	0.520073
	New York	36	1999	1999	4293	12464635	34.4414	33.4112	35.4717	0.525655	34.6207	33.5849	35.6566	0.528479
															23.8978
	New Mexico	35	2023	2023	356	1462629	24.3397	21.8113	26.8681	1.29	19.931	17.7865	22.0754	1.09411
	New Mexico	35	2022	2022	342	1447076	23.6339	21.129	26.1387	1.27797	19.0236	16.9561	21.0912	1.05487
	New Mexico	35	2021	2021	371	1445703	25.6623	23.0509	28.2736	1.33232	20.8613	18.679	23.0437	1.11345
	New Mexico	35	2020	2020	333	1437678	23.1623	20.6745	25.6502	1.26929	19.273	17.1409	21.405	1.08778
	New Mexico	35	2019	2019	302	1425116	21.1913	18.8012	23.5813	1.21942	17.3201	15.3141	19.3262	1.02351
	New Mexico	35	2018	2018	339	1415820	23.9437	21.3949	26.4926	1.30044	20.2537	18.0399	22.4675	1.12948
	New Mexico	35	2017	2017	360	1400834	25.699	23.0442	28.3537	1.35445	21.6747	19.3735	23.9759	1.17407
	New Mexico	35	2016	2016	329	1389990	23.6692	21.1116	26.2269	1.30493	20.2224	17.9892	22.4555	1.13937
	New Mexico	35	2015	2015	336	1383351	24.2888	21.6917	26.886	1.32507	21.0716	18.7655	23.3777	1.17659
	New Mexico	35	2014	2014	328	1375188	23.8513	21.27	26.4325	1.31697	21.0808	18.7555	23.4061	1.18637
	New Mexico	35	2013	2013	343	1367212	25.0876	22.4325	27.7426	1.3546	22.3796	19.9729	24.7864	1.22795
	New Mexico	35	2012	2012	326	1363871	23.9026	21.3078	26.4973	1.32384	21.5227	19.1588	23.8867	1.20609
	New Mexico	35	2011	2011	338	1355797	24.93	22.2722	27.5878	1.35601	23.1366	20.6411	25.6321	1.27321
	New Mexico	35	2010	2010	316	1336968	23.6356	21.0295	26.2416	1.3296	22.1298	19.6623	24.5974	1.25896
	New Mexico	35	2009	2009	322	1318922	24.4139	21.7472	27.0805	1.36053	23.3745	20.7907	25.9582	1.31823
	New Mexico	35	2008	2008	350	1297719	26.9704	24.1448	29.796	1.44163	26.1173	23.3538	28.8809	1.40997
	New Mexico	35	2007	2007	322	1279430	25.1675	22.4185	27.9164	1.40253	24.3594	21.6739	27.0448	1.37013
	New Mexico	35	2006	2006	312	1254985	24.8609	22.1022	27.6195	1.40747	24.2176	21.5118	26.9234	1.3805
	New Mexico	35	2005	2005	308	1226734	25.1073	22.3033	27.9113	1.43062	25.3009	22.4611	28.1406	1.44884
	New Mexico	35	2004	2004	309	1200730	25.7343	22.865	28.6037	1.46398	25.7269	22.8445	28.6093	1.47063
	New Mexico	35	2003	2003	293	1179554	24.8399	21.9956	27.6842	1.45116	24.7269	21.8843	27.5694	1.45028
	New Mexico	35	2002	2002	323	1161414	27.8109	24.7779	30.8439	1.54744	28.2355	25.1456	31.3254	1.57647
	New Mexico	35	2001	2001	309	1143793	27.0154	24.0031	30.0276	1.53685	27.7234	24.624	30.8228	1.58134
	New Mexico	35	2000	2000	304	1132896	26.8339	23.8174	29.8504	1.53903	28.2393	25.0557	31.423	1.62433
	New Mexico	35	1999	1999	272	1120522	24.2744	21.3896	27.1592	1.47185	25.8308	22.7514	28.9102	1.5711
															22.9493
	New Jersey	34	2023	2023	1422	6508294	21.849	20.7134	22.9847	0.579406	18.2037	17.2415	19.166	0.490931
	New Jersey	34	2022	2022	1342	6472724	20.7332	19.6239	21.8424	0.565964	17.2097	16.2735	18.1459	0.477661
	New Jersey	34	2021	2021	1407	6470760	21.744	20.6078	22.8802	0.579685	18.5676	17.5798	19.5554	0.503979
	New Jersey	34	2020	2020	1429	6203002	23.0372	21.8428	24.2317	0.609416	18.9921	17.9888	19.9954	0.511874
	New Jersey	34	2019	2019	1412	6189978	22.8111	21.6212	24.0009	0.607055	18.9968	17.987	20.0065	0.515171
	New Jersey	34	2018	2018	1501	6188871	24.2532	23.0262	25.4802	0.626007	20.4284	19.3773	21.4795	0.536268
	New Jersey	34	2017	2017	1508	6239408	24.169	22.9491	25.3888	0.622382	20.5885	19.5323	21.6447	0.538868
	New Jersey	34	2016	2016	1582	6172974	25.6278	24.365	26.8907	0.644331	22.3856	21.2631	23.5081	0.572721
	New Jersey	34	2015	2015	1546	6166447	25.0712	23.8214	26.3209	0.637631	22.0153	20.8991	23.1315	0.569513
	New Jersey	34	2014	2014	1526	6128928	24.8983	23.6491	26.1476	0.637372	21.9329	20.8167	23.0491	0.569503
	New Jersey	34	2013	2013	1561	6085301	25.652	24.3794	26.9245	0.649261	23.0659	21.9056	24.2262	0.591997
	New Jersey	34	2012	2012	1646	6052995	27.1931	25.8794	28.5069	0.670262	24.5721	23.3712	25.7731	0.612722
	New Jersey	34	2011	2011	1587	6004569	26.4299	25.1295	27.7302	0.663448	24.0664	22.8693	25.2634	0.61074
	New Jersey	34	2010	2010	1630	5959452	27.3515	26.0237	28.6793	0.677466	25.118	23.8878	26.3481	0.62763
	New Jersey	34	2009	2009	1660	5925455	28.0147	26.667	29.3624	0.687594	26.0094	24.7487	27.2701	0.643219
	New Jersey	34	2008	2008	1718	5883654	29.1995	27.8188	30.5803	0.704473	27.3574	26.0569	28.658	0.66354
	New Jersey	34	2007	2007	1780	5848324	30.4361	29.0221	31.85	0.721404	28.8085	27.4638	30.1531	0.686052
	New Jersey	34	2006	2006	1777	5826095	30.5007	29.0826	31.9189	0.723546	29.1211	27.7622	30.48	0.693306
	New Jersey	34	2005	2005	1777	5809541	30.5876	29.1654	32.0098	0.725608	29.4598	28.0866	30.833	0.700606
	New Jersey	34	2004	2004	1783	5790010	30.7944	29.365	32.2238	0.729283	29.8757	28.4867	31.2648	0.708679
	New Jersey	34	2003	2003	2026	5767414	35.1284	33.5987	36.6581	0.780438	34.3065	32.8109	35.802	0.763044
	New Jersey	34	2002	2002	1962	5737815	34.1942	32.6811	35.7073	0.771975	33.5807	32.0939	35.0675	0.758577
	New Jersey	34	2001	2001	2004	5699459	35.1612	33.6218	36.7007	0.785444	34.8598	33.3331	36.3864	0.778912
	New Jersey	34	2000	2000	2019	5650164	35.7335	34.1748	37.2922	0.795256	35.5048	33.9559	37.0537	0.790268
	New Jersey	34	1999	1999	2023	5618014	36.0092	34.44	37.5783	0.800599	35.9665	34.3989	37.5341	0.799791
															25.6397
	New Hampshire	33	2023	2023	219	1030170	21.2586	18.443	24.0742	1.43652	17.2872	14.9082	19.6662	1.21377
	New Hampshire	33	2022	2022	215	1021573	21.046	18.2327	23.8592	1.43532	16.4062	14.1357	18.6767	1.15842
	New Hampshire	33	2021	2021	219	1009660	21.6905	18.8177	24.5633	1.46571	17.6497	15.2336	20.0657	1.23267
	New Hampshire	33	2020	2020	211	990858	21.2947	18.4213	24.168	1.46599	17.3875	14.9516	19.8235	1.24284
	New Hampshire	33	2019	2019	213	980767	21.7177	18.8011	24.6343	1.48807	17.594	15.1577	20.0304	1.24303
	New Hampshire	33	2018	2018	230	972151	23.6589	20.6012	26.7165	1.56002	19.2641	16.697	21.8312	1.30973
	New Hampshire	33	2017	2017	235	956963	24.5569	21.4171	27.6966	1.60191	19.9831	17.3482	22.6179	1.3443
	New Hampshire	33	2016	2016	229	946691	24.1895	21.0565	27.3226	1.59849	20.9385	18.144	23.7331	1.42579
	New Hampshire	33	2015	2015	196	937585	20.9048	17.9781	23.8314	1.4932	17.6378	15.1003	20.1752	1.29463
	New Hampshire	33	2014	2014	214	931266	22.9795	19.9006	26.0583	1.57084	19.6724	16.9804	22.3644	1.37347
	New Hampshire	33	2013	2013	206	925288	22.2633	19.2231	25.3036	1.55116	19.7858	17.0322	22.5394	1.40492
	New Hampshire	33	2012	2012	215	920125	23.3664	20.243	26.4898	1.59357	21.242	18.3477	24.1363	1.47668
	New Hampshire	33	2011	2011	231	913424	25.2895	22.0282	28.5508	1.66392	22.9463	19.9423	25.9503	1.53266
	New Hampshire	33	2010	2010	213	906122	23.5068	20.3499	26.6637	1.61066	22.0207	19.0218	25.0195	1.53001
	New Hampshire	33	2009	2009	191	901868	21.1783	18.1748	24.1818	1.53241	20.0918	17.2054	22.9782	1.47266
	New Hampshire	33	2008	2008	246	897062	27.4229	23.996	30.8498	1.74842	25.8525	22.588	29.117	1.66557
	New Hampshire	33	2007	2007	216	889696	24.278	21.0402	27.5157	1.65191	23.7795	20.5817	26.9773	1.63152
	New Hampshire	33	2006	2006	241	881820	27.3298	23.8793	30.7804	1.76047	26.8986	23.474	30.3233	1.74725
	New Hampshire	33	2005	2005	242	870985	27.7846	24.2839	31.2853	1.78606	28.1142	24.5505	31.678	1.81823
	New Hampshire	33	2004	2004	222	863418	25.7118	22.3295	29.0941	1.72566	26.3419	22.863	29.8209	1.77499
	New Hampshire	33	2003	2003	263	853960	30.7977	27.0755	34.5199	1.89907	32.1625	28.262	36.0631	1.99008
	New Hampshire	33	2002	2002	223	845204	26.3842	22.9212	29.8471	1.76681	27.4546	23.8403	31.0689	1.84401
	New Hampshire	33	2001	2001	261	835923	31.223	27.435	35.011	1.93265	33.155	29.126	37.184	2.05562
	New Hampshire	33	2000	2000	263	822855	31.9619	28.099	35.8248	1.97085	34.075	29.9522	38.1978	2.10346
	New Hampshire	33	1999	1999	270	812571	33.2279	29.2644	37.1913	2.02218	35.5341	31.291	39.7771	2.16481
															23.331
	Nevada	32	2023	2023	564	2253836	25.024	22.9588	27.0893	1.0537	21.6926	19.8641	23.521	0.932897
	Nevada	32	2022	2022	530	2223279	23.8387	21.8091	25.8682	1.03549	21.0681	19.2381	22.8981	0.933688
	Nevada	32	2021	2021	563	2193751	25.6638	23.5439	27.7837	1.0816	24.0821	22.0436	26.1207	1.04009
	Nevada	32	2020	2020	498	2187799	22.7626	20.7634	24.7618	1.02002	20.4787	18.6425	22.3148	0.936811
	Nevada	32	2019	2019	483	2137297	22.5986	20.5832	24.6141	1.02827	20.6581	18.7781	22.5381	0.959168
	Nevada	32	2018	2018	469	2096606	22.3695	20.3449	24.394	1.03293	20.8676	18.9398	22.7953	0.983531
	Nevada	32	2017	2017	579	2063549	28.0585	25.773	30.344	1.16607	26.5682	24.3572	28.7793	1.12808
	Nevada	32	2016	2016	555	2012406	27.5789	25.2844	29.8734	1.17066	26.0741	23.8572	28.291	1.13108
	Nevada	32	2015	2015	491	1969161	24.9345	22.7289	27.14	1.12528	24.2742	22.0825	26.4659	1.11821
	Nevada	32	2014	2014	497	1920909	25.8732	23.5984	28.1479	1.16057	25.3887	23.1087	27.6686	1.16322
	Nevada	32	2013	2013	482	1873448	25.728	23.4311	28.0248	1.17188	25.9619	23.5961	28.3277	1.20705
	Nevada	32	2012	2012	492	1840601	26.7304	24.3684	29.0924	1.2051	27.3121	24.8473	29.7768	1.25754
	Nevada	32	2011	2011	444	1808901	24.5453	22.2621	26.8284	1.16487	25.7862	23.3349	28.2376	1.25069
	Nevada	32	2010	2010	446	1786714	24.962	22.6453	27.2787	1.18199	26.9652	24.4046	29.5258	1.30645
	Nevada	32	2009	2009	437	1771967	24.6619	22.3496	26.9741	1.17974	26.4168	23.8798	28.9538	1.29439
	Nevada	32	2008	2008	420	1746322	24.0505	21.7504	26.3507	1.17355	27.406	24.726	30.0861	1.36738
	Nevada	32	2007	2007	444	1709429	25.9736	23.5576	28.3896	1.23265	29.1348	26.3592	31.9104	1.41611
	Nevada	32	2006	2006	405	1658641	24.4176	22.0395	26.7957	1.21332	28.2287	25.4008	31.0565	1.44278
	Nevada	32	2005	2005	404	1600130	25.2479	22.7859	27.71	1.25613	28.7249	25.8485	31.6013	1.46754
	Nevada	32	2004	2004	441	1543151	28.5779	25.9106	31.2452	1.36085	33.1045	29.9312	36.2778	1.61902
	Nevada	32	2003	2003	403	1477352	27.2785	24.6152	29.9419	1.35884	31.3164	28.1796	34.4531	1.60037
	Nevada	32	2002	2002	402	1425468	28.2013	25.4444	30.9581	1.40655	32.7548	29.4639	36.0456	1.67901
	Nevada	32	2001	2001	391	1373459	28.4683	25.6465	31.2901	1.4397	34.0711	30.5981	37.5442	1.77197
	Nevada	32	2000	2000	418	1306750	31.9878	28.9212	35.0543	1.56457	37.7051	33.9882	41.422	1.89639
	Nevada	32	1999	1999	367	1270129	28.8947	25.9385	31.851	1.50829	34.2811	30.6718	37.8905	1.84151
															27.2129
	Nebraska	31	2023	2023	326	1302533	25.0282	22.3112	27.7451	1.38618	20.7834	18.4859	23.0809	1.1722
	Nebraska	31	2022	2022	347	1293922	26.8177	23.996	29.6394	1.43965	22.5189	20.1011	24.9367	1.23357
	Nebraska	31	2021	2021	359	1289092	27.8491	24.9682	30.7299	1.46982	24.0819	21.5383	26.6254	1.29772
	Nebraska	31	2020	2020	347	1273906	27.2391	24.373	30.1051	1.46227	22.5916	20.1661	25.0171	1.23751
	Nebraska	31	2019	2019	345	1269036	27.186	24.3172	30.0547	1.46364	22.8934	20.419	25.3678	1.26246
	Nebraska	31	2018	2018	361	1261719	28.6118	25.6602	31.5633	1.50588	23.8328	21.3188	26.3469	1.28267
	Nebraska	31	2017	2017	312	1253325	24.8938	22.1315	27.6561	1.40933	20.9508	18.5764	23.3252	1.21142
	Nebraska	31	2016	2016	318	1241073	25.623	22.8067	28.4392	1.43687	21.9078	19.4473	24.3683	1.25533
	Nebraska	31	2015	2015	341	1233079	27.6544	24.7191	30.5896	1.49757	23.6023	21.0489	26.1557	1.30275
	Nebraska	31	2014	2014	347	1223276	28.3665	25.3818	31.3511	1.52279	24.9427	22.2739	27.6116	1.36167
	Nebraska	31	2013	2013	324	1215482	26.6561	23.7535	29.5586	1.48089	23.488	20.8897	26.0863	1.32566
	Nebraska	31	2012	2012	342	1206439	28.3479	25.3434	31.3523	1.53288	24.6988	22.0448	27.3527	1.35406
	Nebraska	31	2011	2011	354	1197547	29.5604	26.481	32.6398	1.57112	26.0944	23.3376	28.8513	1.40656
	Nebraska	31	2010	2010	358	1184593	30.2214	27.0907	33.352	1.59725	26.7719	23.9663	29.5775	1.43141
	Nebraska	31	2009	2009	333	1172815	28.3932	25.3436	31.4429	1.55594	25.3789	22.6296	28.1283	1.40275
	Nebraska	31	2008	2008	370	1157969	31.9525	28.6967	35.2083	1.66113	28.3013	25.3933	31.2094	1.48371
	Nebraska	31	2007	2007	369	1146182	32.1938	28.909	35.4787	1.67594	28.3076	25.3948	31.2203	1.4861
	Nebraska	31	2006	2006	383	1133629	33.7853	30.4017	37.1689	1.72635	30.0351	27.0062	33.064	1.54537
	Nebraska	31	2005	2005	364	1122671	32.4227	29.0918	35.7535	1.69941	28.7663	25.7933	31.7392	1.51682
	Nebraska	31	2004	2004	357	1112709	32.0839	28.7557	35.4121	1.69806	28.4829	25.5119	31.454	1.51585
	Nebraska	31	2003	2003	363	1105222	32.8441	29.4653	36.2229	1.72387	29.4206	26.3784	32.4629	1.55215
	Nebraska	31	2002	2002	406	1098316	36.9657	33.3699	40.5615	1.83458	33.5878	30.3052	36.8704	1.67479
	Nebraska	31	2001	2001	378	1092582	34.5969	31.1092	38.0847	1.77947	31.0488	27.902	34.1955	1.60549
	Nebraska	31	2000	2000	412	1086596	37.9166	34.2553	41.5779	1.86802	34.4972	31.1505	37.844	1.70752
	Nebraska	31	1999	1999	407	1081337	37.6386	33.9819	41.2953	1.86568	34.1756	30.8379	37.5134	1.70294
															26.4464
	Montana	30	2023	2023	201	795124	25.2791	21.7843	28.7739	1.78305	19.8759	17.0481	22.7036	1.44274
	Montana	30	2022	2022	190	784066	24.2327	20.7869	27.6784	1.75802	19.8394	16.9133	22.7656	1.49292
	Montana	30	2021	2021	201	769344	26.1262	22.5143	29.738	1.8428	21.0149	18.0134	24.0164	1.53138
	Montana	30	2020	2020	164	752905	21.7823	18.4485	25.1161	1.70091	17.1928	14.4631	19.9225	1.39268
	Montana	30	2019	2019	182	742426	24.5142	20.9527	28.0758	1.81712	19.6382	16.68	22.5964	1.5093
	Montana	30	2018	2018	165	734426	22.4665	19.0385	25.8946	1.74902	18.47	15.5594	21.3806	1.48502
	Montana	30	2017	2017	177	723258	24.4726	20.8672	28.078	1.83947	19.6987	16.7265	22.6709	1.51645
	Montana	30	2016	2016	187	715607	26.1317	22.3862	29.8771	1.91094	20.8358	17.7624	23.9093	1.5681
	Montana	30	2015	2015	192	705719	27.2063	23.3579	31.0546	1.96345	22.0009	18.8035	25.1982	1.63131
	Montana	30	2014	2014	191	697570	27.3808	23.4976	31.2639	1.9812	22.555	19.2792	25.8308	1.67134
	Montana	30	2013	2013	161	690901	23.3029	19.7033	26.9025	1.83653	18.9654	15.9773	21.9535	1.52454
	Montana	30	2012	2012	181	684647	26.437	22.5855	30.2885	1.96505	22.1614	18.8692	25.4536	1.67969
	Montana	30	2011	2011	162	678442	23.8782	20.2012	27.5553	1.87605	20.0962	16.9406	23.2519	1.61004
	Montana	30	2010	2010	167	671241	24.8793	21.1059	28.6527	1.92522	21.6849	18.352	25.0178	1.70045
	Montana	30	2009	2009	200	664660	30.0906	25.9202	34.2609	2.12772	25.7982	22.1769	29.4196	1.84762
	Montana	30	2008	2008	161	655507	24.5611	20.7672	28.3551	1.93569	21.3109	17.99	24.6317	1.6943
	Montana	30	2007	2007	161	644607	24.9765	21.1184	28.8346	1.96842	21.8255	18.4285	25.2226	1.73318
	Montana	30	2006	2006	203	631405	32.1505	27.7277	36.5733	2.25652	28.9417	24.9363	32.947	2.04355
	Montana	30	2005	2005	188	619795	30.3326	25.9966	34.6686	2.21223	27.367	23.4349	31.2992	2.0062
	Montana	30	2004	2004	150	610554	24.5679	20.6362	28.4995	2.00596	22.252	18.6769	25.8272	1.82406
	Montana	30	2003	2003	162	601123	26.9496	22.7995	31.0996	2.11736	24.8271	20.9909	28.6632	1.95721
	Montana	30	2002	2002	184	594984	30.9252	26.4567	35.3937	2.27984	28.3816	24.2745	32.4887	2.09547
	Montana	30	2001	2001	186	590500	31.4987	26.9719	36.0255	2.3096	29.1835	24.985	33.3819	2.14205
	Montana	30	2000	2000	198	586376	33.7667	29.0633	38.4701	2.3997	31.7107	27.2926	36.1288	2.25414
	Montana	30	1999	1999	185	580980	31.8427	27.2541	36.4314	2.34113	30.1584	25.8099	34.5068	2.21859
															23.0314
	Missouri	29	2023	2023	1166	4257651	27.386	25.8141	28.9579	0.802009	22.4882	21.1679	23.8084	0.673592
	Missouri	29	2022	2022	1218	4233930	28.7676	27.152	30.3832	0.82429	23.6421	22.2815	25.0028	0.694225
	Missouri	29	2021	2021	1169	4225868	27.663	26.0772	29.2488	0.80908	23.3944	22.0204	24.7685	0.701039
	Missouri	29	2020	2020	1037	4222113	24.5612	23.0662	26.0561	0.76271	20.0281	18.7781	21.2782	0.637783
	Missouri	29	2019	2019	1078	4205339	25.6341	24.1038	27.1643	0.780743	21.0322	19.748	22.3164	0.655218
	Missouri	29	2018	2018	1151	4183237	27.5146	25.925	29.1042	0.811008	23.0122	21.6538	24.3705	0.693032
	Missouri	29	2017	2017	1108	4159609	26.6371	25.0687	28.2056	0.800235	22.3865	21.0421	23.731	0.685944
	Missouri	29	2016	2016	1115	4127446	27.0143	25.4286	28.6	0.809014	22.6323	21.2802	23.9844	0.689833
	Missouri	29	2015	2015	1123	4104797	27.3582	25.7581	28.9584	0.816391	23.3691	21.9791	24.7592	0.709216
	Missouri	29	2014	2014	1070	4077108	26.2441	24.6716	27.8166	0.802305	22.7132	21.3323	24.0941	0.704548
	Missouri	29	2013	2013	1126	4050982	27.7957	26.1722	29.4193	0.82834	24.2948	22.8573	25.7323	0.733416
	Missouri	29	2012	2012	1171	4024987	29.0933	27.4269	30.7596	0.850186	25.69	24.2008	27.1792	0.75978
	Missouri	29	2011	2011	1104	4006523	27.5551	25.9296	29.1805	0.82931	24.6294	23.1617	26.097	0.748787
	Missouri	29	2010	2010	1163	3974227	29.2636	27.5817	30.9454	0.858099	26.5703	25.0304	28.1101	0.785636
	Missouri	29	2009	2009	1176	3946061	29.8019	28.0986	31.5052	0.86904	27.156	25.5922	28.7197	0.797846
	Missouri	29	2008	2008	1191	3908249	30.474	28.7433	32.2047	0.883026	27.8478	26.2584	29.4372	0.810929
	Missouri	29	2007	2007	1166	3872841	30.1071	28.379	31.8352	0.881697	27.7899	26.1885	29.3913	0.817045
	Missouri	29	2006	2006	1159	3830689	30.2557	28.5138	31.9975	0.88872	28.0077	26.3903	29.6251	0.825206
	Missouri	29	2005	2005	1152	3782384	30.457	28.6982	32.2158	0.897347	28.3132	26.6747	29.9517	0.835952
	Missouri	29	2004	2004	1233	3743139	32.9403	31.1016	34.7789	0.938092	30.6487	28.9353	32.3621	0.874163
	Missouri	29	2003	2003	1225	3712762	32.9943	31.1466	34.842	0.942694	30.8075	29.0804	32.5346	0.881156
	Missouri	29	2002	2002	1293	3686759	35.0715	33.1598	36.9831	0.975337	33.0063	31.2057	34.8069	0.918687
	Missouri	29	2001	2001	1305	3661945	35.6368	33.7033	37.5703	0.986492	33.6487	31.8217	35.4756	0.932127
	Missouri	29	2000	2000	1263	3631541	34.7786	32.8605	36.6967	0.978612	32.8887	31.0733	34.704	0.926206
	Missouri	29	1999	1999	1295	3605323	35.9191	33.9628	37.8755	0.998138	33.9543	32.1032	35.8055	0.944462
															26.3981
	Mississippi	28	2023	2023	674	1976333	34.1036	31.5289	36.6783	1.31362	28.0094	25.8487	30.1701	1.10238
	Mississippi	28	2022	2022	638	1970241	32.3818	29.8691	34.8946	1.28201	26.6155	24.5037	28.7273	1.07747
	Mississippi	28	2021	2021	653	1979677	32.9852	30.4552	35.5152	1.29081	28.497	26.2519	30.7421	1.14544
	Mississippi	28	2020	2020	640	1994136	32.0941	29.6076	34.5806	1.26863	27.0159	24.8718	29.1601	1.09395
	Mississippi	28	2019	2019	653	1994145	32.7459	30.2342	35.2575	1.28144	27.9977	25.8003	30.1951	1.12113
	Mississippi	28	2018	2018	623	1988465	31.3307	28.8704	33.791	1.25524	26.8695	24.7206	29.0185	1.09641
	Mississippi	28	2017	2017	626	1978153	31.6457	29.1666	34.1247	1.26482	27.0632	24.9058	29.2207	1.10075
	Mississippi	28	2016	2016	650	1971521	32.9695	30.4349	35.5041	1.29317	28.8105	26.5583	31.0627	1.14908
	Mississippi	28	2015	2015	611	1961991	31.1418	28.6725	33.6112	1.25986	27.5331	25.3124	29.7539	1.13305
	Mississippi	28	2014	2014	649	1951710	33.2529	30.6945	35.8113	1.30529	29.773	27.4476	32.0983	1.18639
	Mississippi	28	2013	2013	618	1939980	31.856	29.3444	34.3676	1.28144	29.047	26.7237	31.3704	1.18539
	Mississippi	28	2012	2012	626	1928472	32.4609	29.918	35.0038	1.2974	29.8861	27.5145	32.2577	1.21
	Mississippi	28	2011	2011	624	1918698	32.5221	29.9703	35.0738	1.30192	30.5221	28.0992	32.9451	1.23618
	Mississippi	28	2010	2010	633	1906908	33.1951	30.6091	35.7811	1.31939	31.6208	29.1338	34.1078	1.26888
	Mississippi	28	2009	2009	606	1895477	31.9708	29.4253	34.5163	1.29873	30.3963	27.9538	32.8387	1.24616
	Mississippi	28	2008	2008	606	1882237	32.1957	29.6323	34.7591	1.30786	30.653	28.1929	33.1132	1.25519
	Mississippi	28	2007	2007	611	1862895	32.7984	30.1977	35.3991	1.32688	31.7728	29.2354	34.3102	1.2946
	Mississippi	28	2006	2006	588	1841912	31.9233	29.343	34.5037	1.3165	31.2069	28.6715	33.7423	1.29356
	Mississippi	28	2005	2005	580	1831734	31.664	29.087	34.2409	1.31478	31.173	28.625	33.721	1.3
	Mississippi	28	2004	2004	594	1810035	32.817	30.1779	35.4562	1.3465	32.4786	29.8587	35.0984	1.33666
	Mississippi	28	2003	2003	585	1790444	32.6735	30.0257	35.3212	1.35088	32.3577	29.7293	34.986	1.34098
	Mississippi	28	2002	2002	620	1778277	34.8652	32.1208	37.6096	1.40022	34.836	32.09	37.582	1.40102
	Mississippi	28	2001	2001	604	1768333	34.1565	31.4324	36.8805	1.38981	34.1418	31.4167	36.8669	1.39036
	Mississippi	28	2000	2000	658	1758497	37.4183	34.5592	40.2774	1.45872	37.5297	34.6598	40.3996	1.46422
	Mississippi	28	1999	1999	578	1742845	33.1642	30.4604	35.8679	1.37945	33.2686	30.5543	35.9829	1.38485
															30.363
	Minnesota	27	2023	2023	844	3930188	21.4748	20.026	22.9236	0.739193	18.0696	16.8248	19.3144	0.635119
	Minnesota	27	2022	2022	804	3908282	20.5717	19.1497	21.9937	0.725508	17.1457	15.9346	18.3568	0.617919
	Minnesota	27	2021	2021	832	3892294	21.3756	19.9231	22.8281	0.741065	18.6014	17.3098	19.8931	0.659016
	Minnesota	27	2020	2020	830	3862286	21.4899	20.0279	22.9519	0.745924	18.4244	17.1429	19.7058	0.653785
	Minnesota	27	2019	2019	803	3838357	20.9204	19.4734	22.3674	0.738265	17.6426	16.3957	18.8895	0.636167
	Minnesota	27	2018	2018	828	3806928	21.7498	20.2683	23.2313	0.755859	18.7872	17.479	20.0953	0.667431
	Minnesota	27	2017	2017	795	3772561	21.0732	19.6083	22.5381	0.74739	18.3716	17.0683	19.6748	0.664912
	Minnesota	27	2016	2016	825	3724077	22.1531	20.6414	23.6648	0.771273	19.3325	17.9872	20.6778	0.686376
	Minnesota	27	2015	2015	826	3698909	22.3309	20.808	23.8538	0.776992	19.7981	18.4207	21.1756	0.702785
	Minnesota	27	2014	2014	795	3667858	21.6748	20.1681	23.1815	0.768725	19.5281	18.1474	20.9088	0.704435
	Minnesota	27	2013	2013	796	3634185	21.9031	20.3815	23.4247	0.776336	19.8217	18.4215	21.2218	0.714377
	Minnesota	27	2012	2012	808	3596615	22.4656	20.9165	24.0146	0.790336	20.429	18.9975	21.8605	0.730357
	Minnesota	27	2011	2011	824	3562989	23.1267	21.5476	24.7057	0.805655	21.4141	19.9313	22.8969	0.756531
	Minnesota	27	2010	2010	835	3517063	23.7414	22.1311	25.3517	0.821605	22.0014	20.4905	23.5124	0.770889
	Minnesota	27	2009	2009	818	3488898	23.4458	21.8391	25.0525	0.819763	22.0386	20.5108	23.5665	0.779511
	Minnesota	27	2008	2008	850	3450601	24.6334	22.9774	26.2894	0.844918	23.3899	21.8017	24.9781	0.810289
	Minnesota	27	2007	2007	863	3409587	25.311	23.6223	26.9997	0.861596	24.0316	22.414	25.6493	0.825336
	Minnesota	27	2006	2006	817	3363495	24.2902	22.6246	25.9558	0.849807	23.5657	21.9378	25.1935	0.830527
	Minnesota	27	2005	2005	794	3323656	23.8894	22.2277	25.551	0.847802	23.259	21.6306	24.8875	0.830843
	Minnesota	27	2004	2004	804	3291854	24.4239	22.7357	26.1122	0.861365	23.7907	22.1372	25.4443	0.843653
	Minnesota	27	2003	2003	960	3261219	29.4368	27.5747	31.299	0.95007	29.0232	27.1782	30.8682	0.94132
	Minnesota	27	2002	2002	934	3233637	28.8839	27.0315	30.7363	0.94511	28.7198	26.871	30.5686	0.943264
	Minnesota	27	2001	2001	868	3205091	27.0819	25.2802	28.8836	0.91922	27.2036	25.3876	29.0196	0.92654
	Minnesota	27	2000	2000	922	3162151	29.1574	27.2753	31.0395	0.960247	29.3887	27.4863	31.2911	0.970623
	Minnesota	27	1999	1999	898	3130423	28.6862	26.81	30.5625	0.957272	28.8603	26.9673	30.7533	0.965825
															22.1055
	Michigan	26	2023	2023	1753	7002243	25.0348	23.8629	26.2068	0.597935	20.4196	19.4374	21.4018	0.501135
	Michigan	26	2022	2022	1769	6970198	25.3795	24.1968	26.5622	0.603419	20.7315	19.7399	21.723	0.505879
	Michigan	26	2021	2021	1840	6967687	26.4076	25.201	27.6143	0.615631	22.2795	21.2323	23.3268	0.534305
	Michigan	26	2020	2020	1835	6911877	26.5485	25.3338	27.7632	0.619758	21.6677	20.6497	22.6856	0.519363
	Michigan	26	2019	2019	1739	6897401	25.2124	24.0274	26.3974	0.604595	20.5726	19.5838	21.5615	0.504508
	Michigan	26	2018	2018	1704	6869308	24.806	23.6282	25.9838	0.600927	20.5034	19.507	21.4999	0.508403
	Michigan	26	2017	2017	1730	6814855	25.3857	24.1895	26.582	0.610332	21.2407	20.2147	22.2667	0.523454
	Michigan	26	2016	2016	1732	6761598	25.6152	24.4089	26.8216	0.615495	21.4245	20.3928	22.4561	0.526348
	Michigan	26	2015	2015	1739	6727854	25.8478	24.6329	27.0626	0.619831	21.8766	20.826	22.9273	0.536056
	Michigan	26	2014	2014	1760	6682428	26.3377	25.1072	27.5682	0.627801	22.5285	21.4555	23.6015	0.547465
	Michigan	26	2013	2013	1746	6645517	26.2734	25.041	27.5057	0.628772	22.8058	21.7177	23.894	0.555202
	Michigan	26	2012	2012	1712	6617815	25.8696	24.6441	27.095	0.625226	22.4064	21.3305	23.4824	0.548965
	Michigan	26	2011	2011	1779	6587292	27.0065	25.7516	28.2615	0.640296	23.9031	22.778	25.0282	0.574052
	Michigan	26	2010	2010	1781	6565683	27.1259	25.8661	28.3857	0.642765	24.452	23.3047	25.5993	0.585351
	Michigan	26	2009	2009	1833	6556201	27.9583	26.6783	29.2382	0.653024	25.5233	24.3462	26.7003	0.600536
	Michigan	26	2008	2008	1808	6557651	27.5708	26.3	28.8417	0.648412	25.5564	24.3713	26.7416	0.604659
	Michigan	26	2007	2007	1803	6563839	27.4687	26.2007	28.7366	0.646904	25.8174	24.6197	27.0151	0.611072
	Michigan	26	2006	2006	1883	6556992	28.7174	27.4203	30.0145	0.66179	27.3709	26.1294	28.6125	0.633442
	Michigan	26	2005	2005	1912	6537234	29.2478	27.9368	30.5589	0.668883	28.3481	27.0736	29.6227	0.650284
	Michigan	26	2004	2004	1858	6514601	28.5205	27.2237	29.8174	0.66166	28.0125	26.7361	29.2889	0.651228
	Michigan	26	2003	2003	1905	6488891	29.3579	28.0395	30.6762	0.672631	29.1241	27.8144	30.4338	0.668212
	Michigan	26	2002	2002	1932	6462820	29.8941	28.561	31.2271	0.680114	29.9746	28.6367	31.3124	0.682581
	Michigan	26	2001	2001	1891	6442351	29.3526	28.0296	30.6756	0.674996	29.8155	28.471	31.1599	0.685938
	Michigan	26	2000	2000	1939	6410540	30.2471	28.9007	31.5934	0.686901	31.0846	29.7004	32.4687	0.7062
	Michigan	26	1999	1999	2028	6377862	31.7975	30.4136	33.1814	0.706088	32.7801	31.3527	34.2074	0.728257
															24.8088
	Massachusetts	25	2023	2023	912	4978391	18.3192	17.1302	19.5081	0.606608	15.3769	14.3574	16.3963	0.520128
	Massachusetts	25	2022	2022	890	4947256	17.9898	16.8079	19.1717	0.603018	15.0536	14.0437	16.0635	0.515252
	Massachusetts	25	2021	2021	921	4936566	18.6567	17.4518	19.8616	0.614759	16.0125	14.9544	17.0706	0.539845
	Massachusetts	25	2020	2020	945	4868179	19.4118	18.1741	20.6494	0.631465	16.3722	15.305	17.4394	0.544505
	Massachusetts	25	2019	2019	989	4848982	20.396	19.1249	21.6672	0.648556	17.1852	16.0892	18.2812	0.559173
	Massachusetts	25	2018	2018	1006	4833363	20.8137	19.5275	22.0999	0.65622	17.689	16.5714	18.8067	0.570225
	Massachusetts	25	2017	2017	990	4789465	20.6704	19.3828	21.958	0.656947	17.8436	16.7052	18.9821	0.580849
	Massachusetts	25	2016	2016	975	4729426	20.6156	19.3216	21.9097	0.660228	18.0268	16.869	19.1847	0.590746
	Massachusetts	25	2015	2015	1009	4706310	21.4393	20.1164	22.7622	0.67494	18.5297	17.3623	19.6971	0.595619
	Massachusetts	25	2014	2014	1045	4656280	22.4428	21.0821	23.8035	0.694255	19.4988	18.2912	20.7064	0.616108
	Massachusetts	25	2013	2013	1053	4608007	22.8515	21.4713	24.2318	0.704208	20.1994	18.9548	21.4441	0.635024
	Massachusetts	25	2012	2012	1058	4559168	23.206	21.8076	24.6043	0.71344	20.6278	19.3645	21.8911	0.644552
	Massachusetts	25	2011	2011	1040	4502934	23.0961	21.6923	24.4998	0.716178	20.5381	19.2697	21.8065	0.647149
	Massachusetts	25	2010	2010	1149	4450818	25.8155	24.3228	27.3082	0.761588	23.079	21.7277	24.4303	0.689458
	Massachusetts	25	2009	2009	1163	4419707	26.314	24.8016	27.8263	0.771607	23.5514	22.1827	24.92	0.698286
	Massachusetts	25	2008	2008	1159	4377614	26.4756	24.9513	27.9999	0.777686	24.0545	22.6569	25.4521	0.713059
	Massachusetts	25	2007	2007	1183	4342902	27.2399	25.6876	28.7921	0.791977	24.7527	23.3297	26.1757	0.726024
	Massachusetts	25	2006	2006	1251	4322737	28.94	27.3363	30.5437	0.81822	26.6484	25.1606	28.1362	0.759083
	Massachusetts	25	2005	2005	1285	4315599	29.7757	28.1477	31.4037	0.830635	27.6715	26.1495	29.1935	0.776513
	Massachusetts	25	2004	2004	1287	4315076	29.8257	28.1962	31.4552	0.831382	27.9129	26.3809	29.4449	0.781646
	Massachusetts	25	2003	2003	1333	4316211	30.8836	29.2256	32.5415	0.845887	29.2649	27.6885	30.8413	0.804302
	Massachusetts	25	2002	2002	1511	4311755	35.0437	33.2767	36.8107	0.901526	33.4129	31.7239	35.1019	0.861726
	Massachusetts	25	2001	2001	1450	4297859	33.7377	32.0012	35.4743	0.885996	32.3587	30.6894	34.0279	0.851658
	Massachusetts	25	2000	2000	1512	4269705	35.4123	33.6273	37.1973	0.910706	34.0648	32.3442	35.7853	0.877834
	Massachusetts	25	1999	1999	1528	4254699	35.9132	34.1125	37.714	0.91874	34.6921	32.9493	36.4349	0.889169
															22.9767
	Maryland	24	2023	2023	932	4298727	21.6808	20.2889	23.0728	0.710179	18.2638	17.0717	19.456	0.608241
	Maryland	24	2022	2022	953	4283668	22.2473	20.8348	23.6598	0.72066	18.8208	17.6049	20.0367	0.620342
	Maryland	24	2021	2021	1011	4273591	23.6569	22.1986	25.1152	0.744017	21.0181	19.6963	22.3399	0.674373
	Maryland	24	2020	2020	958	4201500	22.8014	21.3575	24.2453	0.736679	19.6101	18.3444	20.8758	0.64576
	Maryland	24	2019	2019	987	4184844	23.5851	22.1137	25.0565	0.750722	20.6805	19.3666	21.9943	0.670339
	Maryland	24	2018	2018	1004	4171210	24.0698	22.5809	25.5586	0.759635	21.4469	20.0953	22.7985	0.689571
	Maryland	24	2017	2017	971	4163983	23.319	21.8523	24.7858	0.748343	21.1162	19.7625	22.4699	0.690645
	Maryland	24	2016	2016	974	4120858	23.6359	22.1515	25.1202	0.757342	21.8328	20.4335	23.232	0.713892
	Maryland	24	2015	2015	934	4104053	22.758	21.2984	24.2175	0.744664	21.2842	19.8936	22.6747	0.709463
	Maryland	24	2014	2014	969	4063648	23.8456	22.3442	25.347	0.76603	22.5872	21.141	24.0335	0.737885
	Maryland	24	2013	2013	937	4020213	23.3072	21.8149	24.7996	0.761414	22.064	20.6268	23.5011	0.733233
	Maryland	24	2012	2012	952	3973023	23.9616	22.4395	25.4837	0.7766	23.1802	21.6821	24.6783	0.764351
	Maryland	24	2011	2011	895	3919812	22.8327	21.3368	24.3286	0.763214	22.2948	20.8133	23.7763	0.755844
	Maryland	24	2010	2010	912	3863228	23.6072	22.075	25.1394	0.781713	23.4224	21.8825	24.9623	0.785656
	Maryland	24	2009	2009	995	3824540	26.0162	24.3997	27.6327	0.824769	25.8673	24.2409	27.4938	0.829818
	Maryland	24	2008	2008	964	3782127	25.4883	23.8793	27.0973	0.820923	25.8818	24.2328	27.5307	0.841316
	Maryland	24	2007	2007	1002	3748313	26.732	25.0768	28.3872	0.844497	27.4325	25.7191	29.1459	0.874191
	Maryland	24	2006	2006	1021	3723708	27.4189	25.737	29.1008	0.858099	28.689	26.9166	30.4614	0.904287
	Maryland	24	2005	2005	1029	3692118	27.8702	26.1673	29.5731	0.868825	29.3165	27.5139	31.1191	0.919695
	Maryland	24	2004	2004	1014	3655385	27.7399	26.0325	29.4473	0.871136	29.6103	27.7776	31.443	0.935076
	Maryland	24	2003	2003	1021	3618530	28.2159	26.4851	29.9466	0.883041	30.4471	28.571	32.3232	0.957194
	Maryland	24	2002	2002	1066	3580397	29.7732	27.9859	31.5606	0.9119	32.3018	30.354	34.2496	0.993781
	Maryland	24	2001	2001	1095	3537821	30.9513	29.118	32.7845	0.935344	34.1	32.0731	36.127	1.03417
	Maryland	24	2000	2000	1169	3489392	33.5015	31.581	35.422	0.979845	37.273	35.129	39.4169	1.09384
	Maryland	24	1999	1999	1067	3463880	30.8036	28.9553	32.6519	0.943017	34.6112	32.5274	36.695	1.06317
															25.3261
	Maine	23	2023	2023	257	1035944	24.8083	21.7752	27.8414	1.5475	18.9225	16.5088	21.3362	1.23147
	Maine	23	2022	2022	256	1026980	24.9275	21.8738	27.9811	1.55797	18.6017	16.2317	20.9716	1.20914
	Maine	23	2021	2021	268	1013222	26.4503	23.2835	29.6171	1.61571	20.7005	18.1113	23.2897	1.32103
	Maine	23	2020	2020	284	996077	28.5119	25.1958	31.8279	1.69187	21.2018	18.6463	23.7573	1.30384
	Maine	23	2019	2019	258	988438	26.1018	22.9167	29.2868	1.62503	20.0531	17.5059	22.6003	1.29959
	Maine	23	2018	2018	259	980876	26.405	23.1891	29.6208	1.64072	20.2794	17.7465	22.8123	1.29228
	Maine	23	2017	2017	249	973611	25.5749	22.3982	28.7516	1.62074	20.0503	17.4854	22.6151	1.30859
	Maine	23	2016	2016	261	966482	27.0052	23.7289	30.2815	1.67158	21.2396	18.5853	23.8939	1.35425
	Maine	23	2015	2015	267	962194	27.7491	24.4206	31.0776	1.69822	21.6649	19.0075	24.3224	1.35582
	Maine	23	2014	2014	221	958490	23.0571	20.0172	26.097	1.55099	18.419	15.9248	20.9132	1.27254
	Maine	23	2013	2013	229	953231	24.0236	20.912	27.1351	1.58752	19.4123	16.8421	21.9824	1.3113
	Maine	23	2012	2012	251	947581	26.4885	23.2115	29.7655	1.67194	21.9849	19.2174	24.7523	1.41197
	Maine	23	2011	2011	261	943023	27.6769	24.3192	31.0347	1.71316	23.2349	20.3679	26.102	1.46278
	Maine	23	2010	2010	288	937756	30.7116	27.1646	34.2586	1.8097	25.3571	22.396	28.3183	1.5108
	Maine	23	2009	2009	240	934570	25.6803	22.4313	28.9293	1.65765	22.2736	19.4242	25.123	1.45377
	Maine	23	2008	2008	268	931059	28.7844	25.3382	32.2307	1.75829	24.8273	21.8345	27.82	1.52691
	Maine	23	2007	2007	314	924429	33.9669	30.2099	37.724	1.91686	29.359	26.0947	32.6233	1.66548
	Maine	23	2006	2006	271	917328	29.5423	26.025	33.0597	1.79457	25.8453	22.7521	28.9385	1.57817
	Maine	23	2005	2005	274	910093	30.1068	26.5419	33.6717	1.81882	27.0463	23.8325	30.26	1.63967
	Maine	23	2004	2004	275	903834	30.4259	26.8298	34.0221	1.83475	27.5138	24.2524	30.7752	1.66397
	Maine	23	2003	2003	284	896199	31.6894	28.0038	35.375	1.88042	28.776	25.4252	32.1268	1.70958
	Maine	23	2002	2002	315	887322	35.5001	31.5797	39.4205	2.0002	32.578	28.9778	36.1782	1.83684
	Maine	23	2001	2001	310	878427	35.2904	31.3618	39.2189	2.00436	32.6121	28.9793	36.2448	1.85343
	Maine	23	2000	2000	321	869782	36.9058	32.8684	40.9432	2.05988	34.2976	30.5442	38.051	1.915
	Maine	23	1999	1999	333	860710	38.689	34.5335	42.8445	2.12014	36.2569	32.3608	40.153	1.98779
															24.5003
	Louisiana	22	2023	2023	903	3090075	29.2226	27.3166	31.1286	0.972467	24.8755	23.2122	26.5389	0.848648
	Louisiana	22	2022	2022	832	3097867	26.8572	25.0322	28.6822	0.931106	22.8152	21.2255	24.4049	0.811081
	Louisiana	22	2021	2021	867	3127556	27.7213	25.8761	29.5666	0.941466	24.2497	22.5927	25.9068	0.845439
	Louisiana	22	2020	2020	839	3147630	26.655	24.8513	28.4586	0.920232	22.9336	21.3463	24.521	0.809881
	Louisiana	22	2019	2019	894	3142121	28.4521	26.587	30.3172	0.951581	24.8723	23.2086	26.5361	0.848866
	Louisiana	22	2018	2018	859	3138713	27.3679	25.5377	29.1981	0.933781	24.138	22.4925	25.7836	0.839572
	Louisiana	22	2017	2017	905	3140783	28.8145	26.9371	30.6918	0.957825	26.0069	24.2789	27.7348	0.881621
	Louisiana	22	2016	2016	866	3125184	27.7104	25.8648	29.556	0.941637	25.17	23.4591	26.8808	0.872885
	Louisiana	22	2015	2015	858	3100115	27.6764	25.8245	29.5283	0.944856	25.1404	23.4259	26.855	0.874768
	Louisiana	22	2014	2014	915	3069590	29.8085	27.8771	31.74	0.98544	27.917	26.0768	29.7571	0.938845
	Louisiana	22	2013	2013	909	3039271	29.9085	27.9642	31.8528	0.992002	28.3194	26.4496	30.1892	0.95396
	Louisiana	22	2012	2012	858	3008234	28.5217	26.6132	30.4302	0.973715	27.3704	25.5122	29.2286	0.948054
	Louisiana	22	2011	2011	859	2979796	28.8275	26.8997	30.7553	0.983581	27.8449	25.9565	29.7333	0.96347
	Louisiana	22	2010	2010	858	2940826	29.1755	27.2232	31.1277	0.996034	28.2841	26.3691	30.1991	0.977043
	Louisiana	22	2009	2009	866	2904238	29.8185	27.8325	31.8045	1.01327	29.4431	27.4606	31.4256	1.01148
	Louisiana	22	2008	2008	912	2857720	31.9136	29.8423	33.9848	1.05676	31.4972	29.4347	33.5597	1.05228
	Louisiana	22	2007	2007	856	2812364	30.437	28.398	32.476	1.04032	30.2446	28.2021	32.287	1.04206
	Louisiana	22	2006	2006	858	2764224	31.0395	28.9625	33.1164	1.05967	31.1203	29.0245	33.2161	1.0693
	Louisiana	22	2005	2005	884	2896799	30.5164	28.5047	32.5281	1.02638	31.0435	28.9864	33.1007	1.04956
	Louisiana	22	2004	2004	918	2863134	32.0628	29.9886	34.1369	1.05823	32.8253	30.6919	34.9587	1.08847
	Louisiana	22	2003	2003	1001	2831372	35.3539	33.1637	37.544	1.11743	36.4217	34.1574	38.6861	1.15527
	Louisiana	22	2002	2002	984	2807731	35.0461	32.8563	37.2359	1.11723	36.153	33.8874	38.4187	1.15594
	Louisiana	22	2001	2001	954	2787713	34.2216	32.05	36.3932	1.10797	35.6343	33.3684	37.9001	1.15603
	Louisiana	22	2000	2000	990	2775376	35.6708	33.4488	37.8929	1.13369	37.4634	35.1258	39.801	1.19264
	Louisiana	22	1999	1999	954	2762515	34.5337	32.3423	36.7252	1.11807	36.5914	34.265	38.9178	1.18695
															29.135
	Kentucky	21	2023	2023	1019	3101833	32.8515	30.8345	34.8686	1.02913	27.5736	25.8433	29.304	0.882833
	Kentucky	21	2022	2022	913	3089879	29.5481	27.6314	31.4648	0.977899	25.098	23.4336	26.7624	0.84919
	Kentucky	21	2021	2021	951	3078828	30.8884	28.9252	32.8516	1.00162	26.616	24.879	28.3531	0.886251
	Kentucky	21	2020	2020	903	3063277	29.4782	27.5555	31.4009	0.980974	24.7455	23.0956	26.3954	0.841799
	Kentucky	21	2019	2019	903	3050848	29.5983	27.6678	31.5289	0.984971	25.03	23.3651	26.6949	0.84944
	Kentucky	21	2018	2018	909	3041841	29.8832	27.9405	31.8259	0.991164	25.7521	24.0449	27.4594	0.87104
	Kentucky	21	2017	2017	906	3025234	29.9481	27.998	31.8982	0.994959	26.3693	24.6175	28.121	0.893752
	Kentucky	21	2016	2016	879	3006380	29.2378	27.3049	31.1707	0.986167	25.7545	24.0199	27.4892	0.885026
	Kentucky	21	2015	2015	867	2989646	29.0001	27.0697	30.9305	0.984895	25.7787	24.0331	27.5243	0.890614
	Kentucky	21	2014	2014	889	2970628	29.9263	27.9591	31.8936	1.0037	26.8507	25.0582	28.6431	0.914504
	Kentucky	21	2013	2013	860	2954357	29.1095	27.164	31.0551	0.992627	26.3874	24.5979	28.1769	0.913015
	Kentucky	21	2012	2012	845	2938290	28.7582	26.8192	30.6973	0.989313	26.4669	24.6574	28.2765	0.923232
	Kentucky	21	2011	2011	865	2929061	29.5316	27.5636	31.4997	1.00411	28.0115	26.1234	29.8995	0.963294
	Kentucky	21	2010	2010	831	2903195	28.6236	26.6775	30.5698	0.992943	27.2004	25.3332	29.0676	0.952645
	Kentucky	21	2009	2009	901	2884331	31.2377	29.198	33.2775	1.04068	29.9898	28.0125	31.9671	1.00882
	Kentucky	21	2008	2008	891	2860325	31.1503	29.1049	33.1957	1.04357	30.0505	28.0613	32.0398	1.01495
	Kentucky	21	2007	2007	948	2832708	33.4662	31.3358	35.5966	1.08693	32.5775	30.4901	34.6648	1.06497
	Kentucky	21	2006	2006	864	2802915	30.8251	28.7696	32.8805	1.04869	30.6138	28.5611	32.6664	1.04726
	Kentucky	21	2005	2005	893	2764644	32.3007	30.1822	34.4193	1.0809	32.3478	30.2168	34.4788	1.08725
	Kentucky	21	2004	2004	863	2730411	31.607	29.4982	33.7158	1.07591	31.9048	29.7684	34.0412	1.09
	Kentucky	21	2003	2003	949	2703877	35.0978	32.8647	37.3308	1.13932	35.4441	33.1819	37.7063	1.15419
	Kentucky	21	2002	2002	988	2680576	36.8577	34.5595	39.156	1.1726	37.4063	35.0686	39.7439	1.19268
	Kentucky	21	2001	2001	913	2662757	34.2878	32.0636	36.5119	1.13476	34.9601	32.6892	37.2309	1.15859
	Kentucky	21	2000	2000	950	2645093	35.9156	33.6317	38.1995	1.16525	36.833	34.4881	39.1779	1.19639
	Kentucky	21	1999	1999	861	2621057	32.8493	30.6551	35.0436	1.1195	33.7761	31.5174	36.0347	1.15237
															29.3415
	Kansas	20	2023	2023	493	1946549	25.3269	23.0912	27.5626	1.14067	21.1301	19.222	23.0383	0.973545
	Kansas	20	2022	2022	516	1938797	26.6144	24.318	28.9108	1.17164	22.1289	20.1747	24.0831	0.997022
	Kansas	20	2021	2021	499	1937697	25.7522	23.4927	28.0118	1.15283	22.0093	20.0287	23.99	1.01055
	Kansas	20	2020	2020	542	1925317	28.1512	25.7812	30.5212	1.2092	23.0365	21.0458	25.0272	1.01567
	Kansas	20	2019	2019	464	1918904	24.1805	21.9803	26.3807	1.12255	20.1566	18.2783	22.0349	0.95832
	Kansas	20	2018	2018	520	1910809	27.2136	24.8745	29.5527	1.1934	22.8773	20.8634	24.8912	1.02751
	Kansas	20	2017	2017	510	1904316	26.7813	24.4569	29.1056	1.18589	22.8164	20.7939	24.8388	1.03186
	Kansas	20	2016	2016	497	1895205	26.2241	23.9185	28.5296	1.17631	22.511	20.4898	24.5322	1.0312
	Kansas	20	2015	2015	499	1887847	26.4322	24.113	28.7514	1.18327	22.6622	20.6331	24.6914	1.03529
	Kansas	20	2014	2014	507	1879220	26.9793	24.6308	29.3277	1.19819	23.4172	21.3423	25.4921	1.05862
	Kansas	20	2013	2013	510	1869590	27.2787	24.9112	29.6462	1.20792	23.7925	21.6944	25.8905	1.07041
	Kansas	20	2012	2012	472	1864659	25.3129	23.0293	27.5966	1.16512	22.5718	20.5019	24.6416	1.05605
	Kansas	20	2011	2011	515	1854121	27.776	25.377	30.1749	1.22396	24.7194	22.5533	26.8854	1.10511
	Kansas	20	2010	2010	500	1838020	27.2032	24.8187	29.5877	1.21656	24.5351	22.359	26.7112	1.11025
	Kansas	20	2009	2009	482	1821957	26.4551	24.0933	28.8169	1.205	23.8835	21.7284	26.0385	1.09952
	Kansas	20	2008	2008	509	1801071	28.261	25.8058	30.7161	1.25265	25.5269	23.2888	27.7651	1.14189
	Kansas	20	2007	2007	532	1782021	29.8537	27.3169	32.3906	1.29432	27.1731	24.8457	29.5005	1.18745
	Kansas	20	2006	2006	532	1761223	30.2063	27.6395	32.7731	1.30961	27.4752	25.1225	29.8279	1.20034
	Kansas	20	2005	2005	554	1743971	31.7666	29.1213	34.4119	1.34963	28.9184	26.4958	31.3409	1.23598
	Kansas	20	2004	2004	533	1732701	30.7612	28.1497	33.3728	1.33242	28.0541	25.6606	30.4475	1.22114
	Kansas	20	2003	2003	529	1722229	30.716	28.0985	33.3335	1.33548	28.1607	25.7493	30.5721	1.23031
	Kansas	20	2002	2002	588	1715766	34.2704	31.5004	37.0405	1.41329	31.5111	28.9529	34.0692	1.30518
	Kansas	20	2001	2001	584	1708388	34.1843	31.4117	36.9568	1.41456	31.5713	28.9989	34.1437	1.31245
	Kansas	20	2000	2000	522	1699833	30.7089	28.0745	33.3433	1.34409	28.5461	26.0863	31.0059	1.255
	Kansas	20	1999	1999	584	1694402	34.4664	31.671	37.2619	1.42623	31.9063	29.3063	34.5063	1.32652
															25.2436
	Iowa	19	2023	2023	557	2157758	25.8138	23.67	27.9576	1.09377	20.5027	18.7536	22.2519	0.892406
	Iowa	19	2022	2022	590	2147535	27.4734	25.2565	29.6902	1.13106	22.0547	20.2211	23.8884	0.935546
	Iowa	19	2021	2021	541	2140501	25.2745	23.1447	27.4043	1.08663	20.7115	18.9187	22.5042	0.914684
	Iowa	19	2020	2020	560	2124146	26.3635	24.18	28.5471	1.11406	20.6177	18.8633	22.372	0.895089
	Iowa	19	2019	2019	566	2114524	26.7673	24.562	28.9725	1.12511	21.0787	19.2973	22.8601	0.908898
	Iowa	19	2018	2018	611	2106348	29.0076	26.7075	31.3077	1.17352	22.7811	20.9329	24.6292	0.942928
	Iowa	19	2017	2017	561	2093226	26.8007	24.5829	29.0185	1.13153	21.1469	19.3518	22.9419	0.915836
	Iowa	19	2016	2016	578	2081865	27.7636	25.5001	30.027	1.15481	22.2157	20.3625	24.0689	0.945496
	Iowa	19	2015	2015	574	2072924	27.6904	25.425	29.9557	1.15577	22.4543	20.5748	24.3339	0.958955
	Iowa	19	2014	2014	613	2060735	29.7467	27.3918	32.1015	1.20146	24.0027	22.063	25.9425	0.989666
	Iowa	19	2013	2013	608	2049068	29.672	27.3134	32.0306	1.20336	24.145	22.1833	26.1068	1.00088
	Iowa	19	2012	2012	606	2036943	29.7505	27.3817	32.1192	1.20853	24.6015	22.6023	26.6007	1.02001
	Iowa	19	2011	2011	665	2027289	32.8024	30.3093	35.2956	1.27202	26.9819	24.895	29.0687	1.06474
	Iowa	19	2010	2010	665	2012495	33.0436	30.5321	35.5551	1.28137	27.4468	25.3236	29.5699	1.08324
	Iowa	19	2009	2009	625	1999090	31.2642	28.8131	33.7153	1.25057	25.4678	23.442	27.4936	1.03359
	Iowa	19	2008	2008	632	1983809	31.8579	29.3741	34.3417	1.26724	26.4636	24.3719	28.5554	1.0672
	Iowa	19	2007	2007	652	1967981	33.1304	30.5873	35.6735	1.29749	27.1231	25.0166	29.2297	1.07478
	Iowa	19	2006	2006	672	1948622	34.4859	31.8785	37.0933	1.33032	28.6578	26.4715	30.8442	1.1155
	Iowa	19	2005	2005	663	1932672	34.3048	31.6936	36.9161	1.33229	28.4333	26.2464	30.6201	1.11572
	Iowa	19	2004	2004	675	1919848	35.159	32.5066	37.8114	1.35327	29.1944	26.9721	31.4166	1.13382
	Iowa	19	2003	2003	707	1909907	37.0175	34.2888	39.7462	1.39219	30.8889	28.5922	33.1856	1.17179
	Iowa	19	2002	2002	704	1903866	36.9774	34.2459	39.7089	1.39364	31.0471	28.7351	33.359	1.17955
	Iowa	19	2001	2001	740	1900125	38.9448	36.1388	41.7508	1.43164	32.7472	30.3679	35.1266	1.21393
	Iowa	19	2000	2000	762	1894678	40.2179	37.3623	43.0735	1.45694	34.3445	31.8866	36.8025	1.25404
	Iowa	19	1999	1999	734	1890043	38.8351	36.0256	41.6446	1.43343	33.2106	30.7885	35.6327	1.23575
															25.9328
	Indiana	18	2023	2023	1299	4613822	28.1545	26.6234	29.6856	0.781167	23.8011	22.4821	25.1201	0.672945
	Indiana	18	2022	2022	1247	4585693	27.1933	25.6839	28.7026	0.770067	23.1148	21.8062	24.4234	0.667643
	Indiana	18	2021	2021	1270	4560080	27.8504	26.3186	29.3821	0.781501	24.3462	22.9775	25.715	0.698333
	Indiana	18	2020	2020	1198	4532466	26.4315	24.9348	27.9283	0.763649	22.4462	21.149	23.7434	0.66184
	Indiana	18	2019	2019	1213	4504500	26.9286	25.4132	28.4441	0.773186	23.1722	21.8437	24.5007	0.677794
	Indiana	18	2018	2018	1161	4467771	25.9861	24.4913	27.4809	0.76265	22.2898	20.9861	23.5936	0.665189
	Indiana	18	2017	2017	1235	4435535	27.8433	26.2904	29.3962	0.792296	24.409	23.0229	25.7951	0.707209
	Indiana	18	2016	2016	1150	4396347	26.1581	24.6462	27.6699	0.77136	22.9275	21.5798	24.2753	0.687617
	Indiana	18	2015	2015	1192	4374480	27.249	25.702	28.7959	0.789245	23.903	22.5245	25.2815	0.70333
	Indiana	18	2014	2014	1207	4345545	27.7756	26.2086	29.3426	0.799483	25.009	23.577	26.441	0.730627
	Indiana	18	2013	2013	1139	4318462	26.3751	24.8434	27.9069	0.781507	23.7729	22.3738	25.1719	0.713785
	Indiana	18	2012	2012	1186	4283377	27.6884	26.1126	29.2643	0.804	25.3198	23.8621	26.7775	0.743735
	Indiana	18	2011	2011	1232	4261678	28.9088	27.2945	30.5231	0.823616	26.8826	25.3645	28.4007	0.774538
	Indiana	18	2010	2010	1131	4225194	26.768	25.2079	28.3281	0.795948	24.9019	23.4391	26.3647	0.746332
	Indiana	18	2009	2009	1189	4200806	28.3041	26.6952	29.9129	0.82084	26.576	25.055	28.0971	0.776056
	Indiana	18	2008	2008	1198	4169769	28.7306	27.1037	30.3576	0.830073	27.4033	25.8427	28.9639	0.796204
	Indiana	18	2007	2007	1194	4132596	28.8923	27.2534	30.5311	0.83614	27.7907	26.2077	29.3736	0.807633
	Indiana	18	2006	2006	1232	4090838	30.1161	28.4344	31.7978	0.858011	29.2766	27.6364	30.9169	0.836852
	Indiana	18	2005	2005	1254	4045049	31.0009	29.285	32.7167	0.875437	30.2007	28.5245	31.8769	0.855205
	Indiana	18	2004	2004	1264	4004434	31.565	29.8249	33.3052	0.887835	30.9876	29.2762	32.699	0.87318
	Indiana	18	2003	2003	1279	3974767	32.178	30.4145	33.9415	0.899754	31.7544	30.0121	33.4967	0.888935
	Indiana	18	2002	2002	1313	3943236	33.2975	31.4964	35.0986	0.918924	33.1251	31.3322	34.9181	0.914777
	Indiana	18	2001	2001	1361	3919861	34.7206	32.876	36.5653	0.941149	34.7858	32.9373	36.6342	0.943093
	Indiana	18	2000	2000	1311	3891368	33.69	31.8662	35.5137	0.930463	33.982	32.1424	35.8217	0.938583
	Indiana	18	1999	1999	1388	3868825	35.8765	33.9891	37.764	0.962976	36.2904	34.381	38.1997	0.974164
															27.1387
	Illinois	17	2023	2023	2068	8705736	23.7545	22.7306	24.7783	0.52236	19.877	19.0062	20.7479	0.444301
	Illinois	17	2022	2022	2109	8692160	24.2632	23.2277	25.2988	0.528336	20.4409	19.5542	21.3276	0.452392
	Illinois	17	2021	2021	2158	8727067	24.7277	23.6844	25.771	0.532301	21.4909	20.5673	22.4145	0.471214
	Illinois	17	2020	2020	2113	8671134	24.3682	23.3292	25.4072	0.53012	20.9997	20.0874	21.912	0.465474
	Illinois	17	2019	2019	2171	8696535	24.964	23.9138	26.0141	0.535777	21.4386	20.5215	22.3556	0.467871
	Illinois	17	2018	2018	2196	8707504	25.2196	24.1648	26.2744	0.538174	21.8889	20.9584	22.8195	0.474787
	Illinois	17	2017	2017	2254	8709735	25.8791	24.8107	26.9475	0.545095	22.8574	21.8976	23.8172	0.489693
	Illinois	17	2016	2016	2203	8660919	25.4361	24.3739	26.4983	0.54193	22.4892	21.5342	23.4443	0.487267
	Illinois	17	2015	2015	2371	8665474	27.3615	26.2601	28.4628	0.561919	24.8996	23.8807	25.9186	0.51989
	Illinois	17	2014	2014	2173	8639946	25.1506	24.0931	26.2081	0.539534	23.2219	22.2307	24.2131	0.505711
	Illinois	17	2013	2013	2283	8599257	26.5488	25.4598	27.6379	0.555638	24.64	23.6153	25.6646	0.52277
	Illinois	17	2012	2012	2236	8556543	26.132	25.0489	27.2152	0.552634	24.7085	23.6714	25.7455	0.529111
	Illinois	17	2011	2011	2192	8521067	25.7245	24.6476	26.8014	0.549448	24.5873	23.546	25.6285	0.531247
	Illinois	17	2010	2010	2315	8455146	27.3798	26.2644	28.4951	0.569055	26.3582	25.2744	27.4419	0.552938
	Illinois	17	2009	2009	2303	8409366	27.3861	26.2676	28.5046	0.570668	26.5568	25.4637	27.6499	0.557695
	Illinois	17	2008	2008	2403	8347871	28.7858	27.6348	29.9367	0.58722	28.2707	27.1334	29.4079	0.580209
	Illinois	17	2007	2007	2482	8284292	29.9603	28.7816	31.139	0.601375	29.5273	28.3597	30.6949	0.595702
	Illinois	17	2006	2006	2513	8224003	30.5569	29.3622	31.7516	0.609555	30.2381	29.0511	31.4252	0.60564
	Illinois	17	2005	2005	2373	8169229	29.048	27.8793	30.2168	0.596304	29.0293	27.8579	30.2006	0.597622
	Illinois	17	2004	2004	2518	8124834	30.9914	29.7809	32.2019	0.617609	31.146	29.927	32.365	0.621924
	Illinois	17	2003	2003	2623	8089395	32.4252	31.1843	33.6661	0.633116	32.8016	31.5445	34.0586	0.641344
	Illinois	17	2002	2002	2709	8053666	33.6369	32.3702	34.9035	0.646265	34.2805	32.9885	35.5726	0.65923
	Illinois	17	2001	2001	2732	8014315	34.089	32.8107	35.3673	0.65219	34.8723	33.564	36.1806	0.667502
	Illinois	17	2000	2000	2797	7962944	35.1252	33.8234	36.427	0.66416	36.0813	34.7438	37.4187	0.68238
	Illinois	17	1999	1999	2755	7926145	34.7584	33.4604	36.0563	0.662215	35.7681	34.4323	37.1039	0.681536
															26.7388
	Idaho	16	2023	2023	293	1303711	22.4743	19.9009	25.0477	1.31296	19.9823	17.6431	22.3214	1.19344
	Idaho	16	2022	2022	275	1279698	21.4894	18.9496	24.0293	1.29586	18.6217	16.3733	20.87	1.14712
	Idaho	16	2021	2021	311	1258308	24.7157	21.9688	27.4627	1.4015	22.2566	19.7239	24.7893	1.2922
	Idaho	16	2020	2020	238	1208125	19.6999	17.1971	22.2028	1.27696	17.4393	15.1753	19.7034	1.15511
	Idaho	16	2019	2019	256	1174458	21.7973	19.1271	24.4675	1.36233	19.201	16.7995	21.6025	1.22526
	Idaho	16	2018	2018	278	1144468	24.2908	21.4353	27.1462	1.45686	21.2497	18.6993	23.8	1.30119
	Idaho	16	2017	2017	262	1114357	23.5113	20.6643	26.3583	1.45253	20.9667	18.3781	23.5553	1.32072
	Idaho	16	2016	2016	246	1089404	22.5812	19.7593	25.403	1.43972	20.4294	17.8325	23.0262	1.32491
	Idaho	16	2015	2015	228	1066169	21.385	18.6091	24.1608	1.41625	19.5509	16.9694	22.1324	1.31709
	Idaho	16	2014	2014	231	1047345	22.0558	19.2115	24.9	1.45116	19.7562	17.1645	22.3478	1.32226
	Idaho	16	2013	2013	236	1028678	22.9421	20.015	25.8691	1.4934	20.7609	18.0704	23.4514	1.37272
	Idaho	16	2012	2012	241	1012228	23.8089	20.8029	26.8148	1.53366	22.0401	19.2147	24.8656	1.44154
	Idaho	16	2011	2011	222	999992	22.2002	19.2798	25.1205	1.48998	21.1219	18.3014	23.9423	1.43902
	Idaho	16	2010	2010	216	984092	21.9492	19.022	24.8763	1.49345	21.0276	18.1931	23.8621	1.44617
	Idaho	16	2009	2009	211	973188	21.6813	18.7558	24.6068	1.4926	21.029	18.1654	23.8925	1.46101
	Idaho	16	2008	2008	216	956646	22.5789	19.5677	25.59	1.5363	21.7711	18.8388	24.7034	1.49608
	Idaho	16	2007	2007	219	935734	23.4041	20.3043	26.5038	1.5815	23.6857	20.5266	26.8447	1.61174
	Idaho	16	2006	2006	199	910072	21.8664	18.8283	24.9045	1.55007	21.9553	18.8893	25.0214	1.56433
	Idaho	16	2005	2005	209	880468	23.7374	20.5192	26.9556	1.64195	24.0265	20.7584	27.2946	1.66738
	Idaho	16	2004	2004	189	854738	22.112	18.9595	25.2645	1.60841	22.3682	19.1701	25.5662	1.63167
	Idaho	16	2003	2003	218	833783	26.1459	22.6751	29.6167	1.77082	26.5471	23.016	30.0783	1.8016
	Idaho	16	2002	2002	191	817671	23.359	20.0462	26.6718	1.6902	23.9031	20.5085	27.2977	1.73194
	Idaho	16	2001	2001	187	802605	23.2991	19.9597	26.6386	1.7038	23.9446	20.5096	27.3796	1.75257
	Idaho	16	2000	2000	186	786094	23.6613	20.2608	27.0618	1.73493	24.5877	21.0529	28.1225	1.80345
	Idaho	16	1999	1999	217	771756	28.1177	24.3765	31.8589	1.90875	29.0657	25.1972	32.9342	1.97374
															21.8915
	Hawaii	15	2023	2023	257	1026113	25.046	21.9838	28.1081	1.56232	19.2387	16.7947	21.6827	1.24692
	Hawaii	15	2022	2022	256	1022168	25.0448	21.9768	28.1128	1.5653	19.1986	16.7604	21.6368	1.24399
	Hawaii	15	2021	2021	256	1018888	25.1254	22.0476	28.2033	1.57034	19.8905	17.3686	22.4124	1.28667
	Hawaii	15	2020	2020	230	994906	23.1178	20.1301	26.1055	1.52434	17.8375	15.4548	20.2201	1.21564
	Hawaii	15	2019	2019	250	997130	25.072	21.964	28.1799	1.58569	19.9495	17.3808	22.5182	1.31055
	Hawaii	15	2018	2018	216	995834	21.6904	18.7977	24.583	1.47584	17.2617	14.8818	19.6417	1.21426
	Hawaii	15	2017	2017	229	997611	22.9548	19.9817	25.928	1.5169	18.6195	16.1222	21.1169	1.27417
	Hawaii	15	2016	2016	232	991770	23.3925	20.3824	26.4027	1.53579	19.2268	16.6772	21.7763	1.3008
	Hawaii	15	2015	2015	193	984592	19.602	16.8365	22.3676	1.41098	16.8069	14.3699	19.244	1.2434
	Hawaii	15	2014	2014	248	972990	25.4884	22.3161	28.6607	1.61852	21.5292	18.7754	24.2829	1.40498
	Hawaii	15	2013	2013	245	959761	25.5272	22.3307	28.7237	1.63087	21.9297	19.1275	24.7319	1.42968
	Hawaii	15	2012	2012	230	952432	24.1487	21.0278	27.2696	1.59232	20.8646	18.1054	23.6238	1.40775
	Hawaii	15	2011	2011	236	938084	25.1577	21.9479	28.3674	1.63762	21.8464	19.0169	24.6758	1.4436
	Hawaii	15	2010	2010	212	926171	22.8899	19.8086	25.9712	1.57209	20.2381	17.478	22.9982	1.40822
	Hawaii	15	2009	2009	216	914979	23.6071	20.4588	26.7554	1.60626	21.1156	18.267	23.9643	1.45339
	Hawaii	15	2008	2008	198	902582	21.9371	18.8814	24.9927	1.559	19.9295	17.129	22.7299	1.4288
	Hawaii	15	2007	2007	236	887626	26.5878	23.1956	29.98	1.73072	24.3331	21.2053	27.4609	1.59583
	Hawaii	15	2006	2006	211	878929	24.0065	20.7672	27.2457	1.65267	22.1008	19.1026	25.099	1.52968
	Hawaii	15	2005	2005	210	864097	24.3028	21.0158	27.5899	1.67705	22.6978	19.6162	25.7794	1.57226
	Hawaii	15	2004	2004	197	847032	23.2577	20.0099	26.5055	1.65704	21.6874	18.6511	24.7236	1.54912
	Hawaii	15	2003	2003	239	830017	28.7946	25.144	32.4452	1.86257	27.4013	23.9206	30.8819	1.77583
	Hawaii	15	2002	2002	232	821383	28.245	24.6105	31.8796	1.85438	27.1196	23.6264	30.6128	1.78223
	Hawaii	15	2001	2001	213	810845	26.2689	22.7411	29.7967	1.79991	25.6585	22.2101	29.1069	1.75937
	Hawaii	15	2000	2000	197	800877	24.598	21.1631	28.033	1.75254	24.4815	21.0584	27.9046	1.74646
	Hawaii	15	1999	1999	169	796535	21.2169	18.018	24.4158	1.63207	21.3662	18.1392	24.5931	1.64638
															21.2932
	Georgia	13	2023	2023	1681	7445262	22.5781	21.4988	23.6575	0.550686	20.8167	19.8025	21.8309	0.517458
	Georgia	13	2022	2022	1752	7336378	23.881	22.7627	24.9993	0.570539	22.0326	20.982	23.0832	0.536017
	Georgia	13	2021	2021	1703	7248550	23.4944	22.3785	24.6102	0.56932	22.1615	21.0835	23.2396	0.550028
	Georgia	13	2020	2020	1656	7190182	23.0314	21.9221	24.1407	0.565966	21.3989	20.3488	22.4491	0.535792
	Georgia	13	2019	2019	1606	7098354	22.625	21.5184	23.7315	0.564567	21.3095	20.2478	22.3711	0.541658
	Georgia	13	2018	2018	1621	7003377	23.146	22.0192	24.2728	0.574889	22.0941	20.9973	23.1908	0.559569
	Georgia	13	2017	2017	1636	6911250	23.6716	22.5245	24.8186	0.585241	22.8582	21.7269	23.9895	0.577185
	Georgia	13	2016	2016	1611	6793441	23.7141	22.556	24.8721	0.590824	23.2846	22.1228	24.4464	0.592751
	Georgia	13	2015	2015	1637	6693681	24.4559	23.2712	25.6406	0.604449	24.3959	23.1892	25.6027	0.615699
	Georgia	13	2014	2014	1551	6582492	23.5625	22.3898	24.7352	0.598295	24.2012	22.9712	25.4312	0.627549
	Georgia	13	2013	2013	1463	6485095	22.5594	21.4034	23.7154	0.589801	23.0232	21.8184	24.228	0.614702
	Georgia	13	2012	2012	1424	6413538	22.203	21.0498	23.3563	0.588379	23.2648	22.0306	24.499	0.629686
	Georgia	13	2011	2011	1476	6330218	23.3167	22.1272	24.5063	0.60691	24.8022	23.5095	26.095	0.659578
	Georgia	13	2010	2010	1467	6225944	23.5627	22.3569	24.7685	0.615191	25.588	24.2503	26.9256	0.682473
	Georgia	13	2009	2009	1347	6167360	21.8408	20.6744	23.0072	0.595093	24.3748	23.048	25.7017	0.676952
	Georgia	13	2008	2008	1363	6076825	22.4295	21.2387	23.6202	0.607535	25.1619	23.8011	26.5226	0.694256
	Georgia	13	2007	2007	1358	5964829	22.7668	21.5559	23.9777	0.617806	25.9383	24.533	27.3435	0.716954
	Georgia	13	2006	2006	1357	5834165	23.2595	22.022	24.4971	0.63141	26.9118	25.4561	28.3675	0.742702
	Georgia	13	2005	2005	1329	5674185	23.4219	22.1626	24.6811	0.642479	27.4724	25.9719	28.9729	0.765564
	Georgia	13	2004	2004	1309	5556044	23.5599	22.2836	24.8363	0.651185	28.1613	26.6136	29.7091	0.789669
	Georgia	13	2003	2003	1339	5460736	24.5205	23.2071	25.8339	0.670099	29.4052	27.8093	31.001	0.814223
	Georgia	13	2002	2002	1339	5380942	24.8841	23.5512	26.217	0.680036	30.0972	28.4665	31.7278	0.831954
	Georgia	13	2001	2001	1352	5295458	25.5313	24.1704	26.8923	0.69436	31.0691	29.396	32.7423	0.853645
	Georgia	13	2000	2000	1289	5179487	24.8866	23.528	26.2452	0.69317	30.4199	28.7454	32.0945	0.854347
	Georgia	13	1999	1999	1192	5098026	23.3816	22.0542	24.709	0.67723	28.5669	26.9326	30.2012	0.833819
															25.1524
	Florida	12	2023	2023	4271	16414858	26.0191	25.2388	26.7994	0.398133	19.3612	18.7609	19.9615	0.306278
	Florida	12	2022	2022	4063	16100288	25.2356	24.4596	26.0115	0.395904	18.7493	18.1524	19.3462	0.304541
	Florida	12	2021	2021	4035	15764041	25.5962	24.8064	26.386	0.402953	19.2575	18.6455	19.8695	0.312246
	Florida	12	2020	2020	3889	15740947	24.7063	23.9298	25.4828	0.396176	18.4526	17.8521	19.0531	0.306385
	Florida	12	2019	2019	3907	15505040	25.1983	24.4081	25.9884	0.403133	18.9688	18.3543	19.5833	0.313513
	Florida	12	2018	2018	4046	15316063	26.4167	25.6027	27.2307	0.415304	19.9579	19.3255	20.5904	0.322671
	Florida	12	2017	2017	4042	15040629	26.8739	26.0454	27.7024	0.4227	20.47	19.8232	21.1169	0.330033
	Florida	12	2016	2016	3955	14726104	26.8571	26.02	27.6941	0.427057	20.4735	19.8189	21.1282	0.333992
	Florida	12	2015	2015	3776	14407420	26.2087	25.3728	27.0447	0.426511	20.2241	19.5635	20.8846	0.337013
	Florida	12	2014	2014	3744	14056343	26.6357	25.7825	27.4889	0.435307	20.5564	19.8845	21.2283	0.342802
	Florida	12	2013	2013	3728	13743937	27.1247	26.254	27.9954	0.444249	21.0851	20.3966	21.7735	0.351229
	Florida	12	2012	2012	3662	13524103	27.0776	26.2006	27.9546	0.447456	21.3675	20.6644	22.0707	0.358763
	Florida	12	2011	2011	3678	13291498	27.6718	26.7775	28.5661	0.456281	22.044	21.3223	22.7656	0.368187
	Florida	12	2010	2010	3631	13059562	27.8034	26.899	28.7077	0.461407	22.3538	21.6203	23.0873	0.374242
	Florida	12	2009	2009	3653	12924349	28.2645	27.3479	29.1811	0.467645	23.0416	22.2878	23.7955	0.384623
	Florida	12	2008	2008	3827	12791779	29.9177	28.9698	30.8655	0.483613	24.4805	23.6995	25.2615	0.398456
	Florida	12	2007	2007	3740	12648778	29.5681	28.6204	30.5157	0.48349	24.4302	23.6428	25.2177	0.401767
	Florida	12	2006	2006	3788	12491186	30.3254	29.3596	31.2911	0.492721	25.2085	24.4015	26.0156	0.411752
	Florida	12	2005	2005	3768	12259461	30.7354	29.7541	31.7168	0.500707	25.5062	24.6869	26.3256	0.418038
	Florida	12	2004	2004	3728	11951238	31.1934	30.1921	32.1948	0.510887	25.7642	24.9326	26.5957	0.424282
	Florida	12	2003	2003	3711	11670063	31.7993	30.7762	32.8224	0.522002	26.2186	25.3702	27.0671	0.432884
	Florida	12	2002	2002	3935	11458496	34.3413	33.2683	35.4143	0.54745	28.2995	27.4097	29.1894	0.454016
	Florida	12	2001	2001	3870	11240742	34.4283	33.3436	35.513	0.553427	28.4802	27.5758	29.3846	0.461415
	Florida	12	2000	2000	3888	11005436	35.328	34.2175	36.4385	0.566573	29.0196	28.0993	29.94	0.469568
	Florida	12	1999	1999	3966	10848678	36.5574	35.4197	37.6952	0.580496	29.9269	28.9865	30.8674	0.479834
															22.9479
	District of Columbia	11	2023	2023	82	484525	16.9238	13.46	21.0068	1.86892	18.9403	15.0185	23.5729	2.1137
	District of Columbia	11	2022	2022	83	479328	17.3159	13.7919	21.4657	1.90067	19.8861	15.7923	24.7166	2.20385
	District of Columbia	11	2021	2021	93	478710	19.4272	15.6803	23.7997	2.01451	21.6635	17.4421	26.598	2.27632
	District of Columbia	11	2020	2020	104	511405	20.3361	16.4277	24.2446	1.99412	22.3686	18.0184	26.7189	2.21952
	District of Columbia	11	2019	2019	101	505015	19.9994	16.099	23.8998	1.99002	22.7925	18.2789	27.3061	2.30285
	District of Columbia	11	2018	2018	88	500819	17.5712	14.0926	21.6483	1.8731	19.9168	15.9087	24.6275	2.15592
	District of Columbia	11	2017	2017	97	494716	19.6072	15.9001	23.9192	1.99081	21.7889	17.5865	26.6929	2.25974
	District of Columbia	11	2016	2016	108	480136	22.4936	18.2513	26.7359	2.16445	26.1234	21.0885	31.1583	2.56884
	District of Columbia	11	2015	2015	111	472470	23.4936	19.1229	27.8642	2.22991	25.8636	20.9769	30.7502	2.49318
	District of Columbia	11	2014	2014	117	463025	25.2686	20.6899	29.8473	2.33608	29.3047	23.8951	34.7142	2.75997
	District of Columbia	11	2013	2013	87	453993	19.1633	15.349	23.6379	2.05452	22.1809	17.6924	27.4615	2.41811
	District of Columbia	11	2012	2012	79	440351	17.9402	14.2035	22.3589	2.01843	19.7805	15.5848	24.7582	2.26252
	District of Columbia	11	2011	2011	117	428447	27.3079	22.3597	32.2562	2.52462	30.4391	24.8416	36.0365	2.85585
	District of Columbia	11	2010	2010	115	413893	27.785	22.7067	32.8632	2.59096	29.9715	24.4196	35.5234	2.83259
	District of Columbia	11	2009	2009	106	405186	26.1608	21.1805	31.1411	2.54096	29.3208	23.6861	34.9556	2.87488
	District of Columbia	11	2008	2008	109	396216	27.5102	22.3456	32.6749	2.635	29.2272	23.6931	34.7613	2.82353
	District of Columbia	11	2007	2007	127	391750	32.4186	26.7803	38.0569	2.87669	35.0689	28.9327	41.205	3.1307
	District of Columbia	11	2006	2006	136	388191	35.0343	29.1461	40.9225	3.00417	37.6142	31.2531	43.9753	3.24546
	District of Columbia	11	2005	2005	119	385650	30.857	25.3128	36.4012	2.82866	32.4253	26.5698	38.2809	2.98753
	District of Columbia	11	2004	2004	110	385654	28.523	23.1926	33.8533	2.71956	30.4389	24.7342	36.1435	2.91053
	District of Columbia	11	2003	2003	108	385704	28.0007	22.7198	33.2817	2.69437	30.0592	24.3768	35.7416	2.89919
	District of Columbia	11	2002	2002	139	387530	35.8682	29.9053	41.8311	3.0423	38.497	32.0875	44.9066	3.27018
	District of Columbia	11	2001	2001	150	387311	38.7286	32.5307	44.9264	3.16217	41.6167	34.9526	48.2807	3.40001
	District of Columbia	11	2000	2000	162	384430	42.1403	35.651	48.6296	3.31086	44.7719	37.8744	51.6693	3.51912
	District of Columbia	11	1999	1999	142	386935	36.6987	30.6625	42.7349	3.07968	39.4292	32.9411	45.9172	3.31024
															28.7796
	Delaware	10	2023	2023	181	732837	24.6985	21.1003	28.2968	1.83583	19.5194	16.5508	22.488	1.51459
	Delaware	10	2022	2022	192	722684	26.5676	22.8096	30.3256	1.91735	21.0219	17.9276	24.1163	1.57876
	Delaware	10	2021	2021	154	711231	21.6526	18.2328	25.0724	1.74482	16.6809	13.9598	19.4021	1.38835
	Delaware	10	2020	2020	177	699410	25.307	21.5787	29.0353	1.90219	19.8659	16.8444	22.8875	1.54163
	Delaware	10	2019	2019	166	687698	24.1385	20.4664	27.8106	1.87351	19.5243	16.4693	22.5794	1.55869
	Delaware	10	2018	2018	175	679747	25.7449	21.9305	29.5593	1.94613	20.9092	17.7433	24.075	1.61521
	Delaware	10	2017	2017	176	672481	26.1717	22.3051	30.0384	1.97277	21.5284	18.2701	24.7867	1.66239
	Delaware	10	2016	2016	163	662207	24.6147	20.8358	28.3935	1.92797	20.7193	17.4732	23.9654	1.65618
	Delaware	10	2015	2015	161	653648	24.631	20.8263	28.4357	1.94119	20.7727	17.5081	24.0373	1.66561
	Delaware	10	2014	2014	154	641653	24.0005	20.2098	27.7912	1.93402	20.9254	17.5669	24.284	1.71354
	Delaware	10	2013	2013	151	630056	23.9661	20.1435	27.7888	1.95034	21.325	17.8805	24.7695	1.75738
	Delaware	10	2012	2012	146	618381	23.61	19.7802	27.4398	1.95398	20.7146	17.3052	24.1241	1.73953
	Delaware	10	2011	2011	143	610797	23.412	19.5747	27.2493	1.95781	20.6387	17.221	24.0565	1.74375
	Delaware	10	2010	2010	155	601264	25.779	21.7206	29.8374	2.07062	23.1482	19.4782	26.8183	1.87249
	Delaware	10	2009	2009	162	595725	27.1938	23.0061	31.3814	2.13654	24.8316	20.9817	28.6815	1.96424
	Delaware	10	2008	2008	160	589171	27.1568	22.9488	31.3648	2.14693	25.2728	21.3377	29.2079	2.00771
	Delaware	10	2007	2007	194	579697	33.4658	28.7565	38.1751	2.4027	31.8247	27.3285	36.3209	2.29399
	Delaware	10	2006	2006	149	570780	26.1046	21.913	30.2962	2.13857	24.8882	20.8761	28.9002	2.04696
	Delaware	10	2005	2005	163	559412	29.1377	24.6645	33.6109	2.28224	27.9651	23.6566	32.2737	2.19824
	Delaware	10	2004	2004	163	548360	29.725	25.1616	34.2884	2.32824	28.8068	24.3681	33.2454	2.26463
	Delaware	10	2003	2003	190	537754	35.3321	30.3081	40.3561	2.56326	34.8006	29.8393	39.7618	2.53125
	Delaware	10	2002	2002	170	528544	32.1638	27.3288	36.9989	2.46685	31.8305	27.0337	36.6274	2.44737
	Delaware	10	2001	2001	166	521131	31.8538	27.008	36.6996	2.47233	32.0847	27.1903	36.9791	2.49715
	Delaware	10	2000	2000	147	513685	28.6168	23.9906	33.2429	2.36027	28.9953	24.2932	33.6974	2.39904
	Delaware	10	1999	1999	183	509177	35.9404	30.733	41.1477	2.65679	36.5619	31.2449	41.8789	2.71275
															24.6063
	Connecticut	9	2023	2023	518	2558865	20.2434	18.5	21.9867	0.889442	16.2551	14.8152	17.695	0.734637
	Connecticut	9	2022	2022	505	2544138	19.8496	18.1183	21.5808	0.883293	16.1325	14.691	17.5741	0.735484
	Connecticut	9	2021	2021	505	2535135	19.92	18.1826	21.6574	0.88643	16.0236	14.5966	17.4506	0.728069
	Connecticut	9	2020	2020	539	2500234	21.558	19.738	23.378	0.928568	16.8693	15.4098	18.3289	0.744673
	Connecticut	9	2019	2019	518	2495774	20.7551	18.9677	22.5425	0.911926	16.1512	14.7296	17.5727	0.725274
	Connecticut	9	2018	2018	493	2490603	19.7944	18.0471	21.5417	0.891495	15.8297	14.395	17.2644	0.73199
	Connecticut	9	2017	2017	484	2492175	19.4208	17.6906	21.151	0.882763	15.8688	14.4133	17.3242	0.742564
	Connecticut	9	2016	2016	513	2471134	20.7597	18.9632	22.5562	0.916563	17.015	15.5053	18.5247	0.770242
	Connecticut	9	2015	2015	541	2474612	21.862	20.0198	23.7043	0.939921	18.2386	16.6633	19.8138	0.803703
	Connecticut	9	2014	2014	529	2471195	21.4066	19.5824	23.2309	0.930724	17.8166	16.2612	19.372	0.793573
	Connecticut	9	2013	2013	542	2466623	21.9734	20.1234	23.8233	0.943837	18.4148	16.8297	20	0.808743
	Connecticut	9	2012	2012	533	2459721	21.6691	19.8295	23.5088	0.938594	18.6275	17.0152	20.2399	0.822621
	Connecticut	9	2011	2011	530	2446361	21.6648	19.8204	23.5093	0.94106	18.7962	17.167	20.4254	0.831235
	Connecticut	9	2010	2010	548	2430423	22.5475	20.6597	24.4354	0.963182	19.419	17.7681	21.07	0.842323
	Connecticut	9	2009	2009	568	2415825	23.5116	21.578	25.4452	0.986526	20.5837	18.8678	22.2996	0.875447
	Connecticut	9	2008	2008	596	2398685	24.8469	22.8521	26.8418	1.01777	22.0041	20.2164	23.7917	0.91208
	Connecticut	9	2007	2007	586	2378587	24.6365	22.6417	26.6312	1.01772	21.8224	20.0362	23.6086	0.911307
	Connecticut	9	2006	2006	645	2367197	27.2474	25.1446	29.3502	1.07287	24.4624	22.5566	26.3682	0.972351
	Connecticut	9	2005	2005	629	2356884	26.6878	24.6021	28.7734	1.06411	23.894	22.0103	25.7777	0.961062
	Connecticut	9	2004	2004	679	2348377	28.9136	26.7388	31.0884	1.1096	26.3393	24.3464	28.3321	1.01674
	Connecticut	9	2003	2003	687	2340431	29.3536	27.1585	31.5486	1.11991	26.9004	24.8786	28.9223	1.03154
	Connecticut	9	2002	2002	746	2324115	32.0982	29.7948	34.4016	1.1752	29.8399	27.6901	31.9898	1.09685
	Connecticut	9	2001	2001	725	2308486	31.4059	29.1198	33.692	1.16638	29.3023	27.1631	31.4415	1.09144
	Connecticut	9	2000	2000	818	2292292	35.6848	33.2393	38.1303	1.24769	33.5479	31.2438	35.852	1.17557
	Connecticut	9	1999	1999	776	2283090	33.989	31.5976	36.3805	1.22013	32.045	29.7863	34.3037	1.15238
															21.288
	Colorado	8	2023	2023	746	4122396	18.0963	16.7977	19.3949	0.662552	17.0892	15.8417	18.3367	0.63648
	Colorado	8	2022	2022	726	4070294	17.8365	16.5391	19.134	0.661976	16.964	15.7099	18.2182	0.639876
	Colorado	8	2021	2021	800	4040577	19.7992	18.4271	21.1712	0.700006	19.5334	18.1486	20.9183	0.706552
	Colorado	8	2020	2020	742	4030205	18.411	17.0862	19.7357	0.675888	17.879	16.5686	19.1893	0.668535
	Colorado	8	2019	2019	689	3973000	17.3421	16.0471	18.637	0.66068	17.09	15.7894	18.3906	0.663579
	Colorado	8	2018	2018	686	3903501	17.574	16.2589	18.8891	0.670977	17.4005	16.0715	18.7295	0.678069
	Colorado	8	2017	2017	720	3824091	18.828	17.4527	20.2033	0.701678	18.6235	17.2324	20.0146	0.70974
	Colorado	8	2016	2016	678	3745042	18.1039	16.7412	19.4667	0.695277	18.4377	17.0203	19.8551	0.723165
	Colorado	8	2015	2015	677	3668427	18.4548	17.0646	19.845	0.709275	18.4255	17.0058	19.8452	0.724326
	Colorado	8	2014	2014	671	3586096	18.7112	17.2954	20.1269	0.722336	19.2111	17.7278	20.6944	0.756788
	Colorado	8	2013	2013	649	3515144	18.463	17.0425	19.8835	0.724735	18.9643	17.4748	20.4539	0.759971
	Colorado	8	2012	2012	640	3449554	18.5531	17.1157	19.9905	0.733377	19.378	17.8469	20.9091	0.781171
	Colorado	8	2011	2011	640	3385944	18.9017	17.4372	20.3661	0.747154	20.3365	18.7311	21.9419	0.819088
	Colorado	8	2010	2010	644	3315889	19.4216	17.9216	20.9217	0.76532	21.0973	19.4379	22.7568	0.846655
	Colorado	8	2009	2009	651	3269672	19.9103	18.3808	21.4397	0.780344	21.6812	19.9849	23.3775	0.865463
	Colorado	8	2008	2008	639	3204937	19.938	18.3921	21.4839	0.788735	22.1423	20.398	23.8865	0.889923
	Colorado	8	2007	2007	607	3138503	19.3404	17.8018	20.879	0.785004	21.9963	20.2221	23.7704	0.905156
	Colorado	8	2006	2006	655	3071204	21.3271	19.6938	22.9604	0.83332	24.6533	22.7412	26.5655	0.975592
	Colorado	8	2005	2005	655	3002828	21.8128	20.1423	23.4833	0.852295	25.8144	23.816	27.8127	1.01956
	Colorado	8	2004	2004	648	2957254	21.9122	20.2251	23.5994	0.860793	26.0263	24.0003	28.0523	1.03368
	Colorado	8	2003	2003	639	2917469	21.9025	20.2043	23.6008	0.866451	26.4732	24.4004	28.546	1.05754
	Colorado	8	2002	2002	661	2888032	22.8876	21.1427	24.6324	0.890223	28.2332	26.0629	30.4034	1.10729
	Colorado	8	2001	2001	618	2845328	21.7198	20.0074	23.4323	0.873699	26.95	24.8093	29.0907	1.09218
	Colorado	8	2000	2000	603	2770355	21.7662	20.0288	23.5035	0.886387	27.0815	24.9058	29.2572	1.11003
	Colorado	8	1999	1999	604	2726699	22.1513	20.3847	23.9179	0.901325	27.6295	25.4124	29.8466	1.13118
															21.5644
	California	6	2023	2023	5591	26957126	20.7403	20.1967	21.284	0.277377	18.524	18.0327	19.0154	0.250696
	California	6	2022	2022	5609	26851336	20.8891	20.3424	21.4358	0.278918	18.7951	18.2971	19.2931	0.254093
	California	6	2021	2021	5528	26908453	20.5437	20.0022	21.0853	0.276309	19.0424	18.5333	19.5515	0.259758
	California	6	2020	2020	5539	26972341	20.5359	19.995	21.0767	0.275929	18.6934	18.1943	19.1925	0.254627
	California	6	2019	2019	5501	26939547	20.4198	19.8802	20.9594	0.275315	18.8607	18.3554	19.3661	0.257819
	California	6	2018	2018	5464	26821695	20.3716	19.8314	20.9117	0.275594	18.9938	18.483	19.5046	0.260599
	California	6	2017	2017	5396	26677565	20.2267	19.687	20.7664	0.275353	19.1794	18.6602	19.6985	0.264868
	California	6	2016	2016	5304	26308367	20.1609	19.6183	20.7035	0.276827	19.2319	18.7065	19.7572	0.268035
	California	6	2015	2015	5516	26088800	21.1432	20.5852	21.7011	0.284681	20.3147	19.771	20.8583	0.277369
	California	6	2014	2014	5278	25654915	20.5731	20.018	21.1281	0.283181	20.0642	19.5156	20.6129	0.279935
	California	6	2013	2013	5188	25148028	20.6298	20.0685	21.1912	0.286415	20.3119	19.7523	20.8715	0.28552
	California	6	2012	2012	5208	24779968	21.017	20.4462	21.5878	0.291229	20.9296	20.3541	21.5051	0.293609
	California	6	2011	2011	5322	24445156	21.7712	21.1863	22.3561	0.298431	21.9278	21.3316	22.524	0.304184
	California	6	2010	2010	5237	24035965	21.7882	21.1981	22.3783	0.301078	22.3799	21.7678	22.9919	0.312256
	California	6	2009	2009	5219	23784383	21.943	21.3476	22.5383	0.30374	22.804	22.1801	23.428	0.318349
	California	6	2008	2008	5149	23470137	21.9385	21.3393	22.5378	0.305735	23.0749	22.4401	23.7097	0.323875
	California	6	2007	2007	5138	23172540	22.1728	21.5665	22.7791	0.309331	23.6308	22.9808	24.2809	0.331656
	California	6	2006	2006	5166	22949436	22.5104	21.8965	23.1242	0.313188	24.3195	23.6531	24.9859	0.340016
	California	6	2005	2005	5191	22737973	22.8297	22.2086	23.4507	0.316865	24.859	24.1801	25.5378	0.346354
	California	6	2004	2004	5160	22494088	22.9394	22.3134	23.5653	0.319342	25.2983	24.6058	25.9907	0.353299
	California	6	2003	2003	5343	22240382	24.0239	23.3797	24.668	0.328663	26.6494	25.9331	27.3658	0.365475
	California	6	2002	2002	5249	21949511	23.914	23.267	24.5609	0.330076	26.7535	26.0283	27.4787	0.369994
	California	6	2001	2001	5273	21665059	24.3387	23.6818	24.9957	0.335173	27.4897	26.7467	28.2328	0.379107
	California	6	2000	2000	5236	21255789	24.6333	23.9661	25.3005	0.340426	27.9638	27.2054	28.7222	0.38693
	California	6	1999	1999	5151	21033993	24.4889	23.8202	25.1577	0.341212	28.0006	27.235	28.7663	0.390641
															22.3237
	Arkansas	5	2023	2023	634	2076653	30.5299	28.1534	32.9064	1.2125	25.3281	23.3085	27.3477	1.03042
	Arkansas	5	2022	2022	637	2058287	30.9481	28.5447	33.3514	1.22621	25.61	23.5746	27.6454	1.03848
	Arkansas	5	2021	2021	591	2044571	28.9058	26.5753	31.2363	1.18903	24.0388	22.0581	26.0196	1.01057
	Arkansas	5	2020	2020	552	2052176	26.8983	24.6543	29.1422	1.14487	21.8721	20.0081	23.7362	0.951041
	Arkansas	5	2019	2019	613	2038589	30.0698	27.6894	32.4503	1.21451	24.6429	22.654	26.6318	1.01475
	Arkansas	5	2018	2018	529	2030067	26.0583	23.8376	28.2789	1.13297	21.6477	19.7702	23.5252	0.957921
	Arkansas	5	2017	2017	581	2017391	28.7996	26.4578	31.1414	1.19481	24.5232	22.4893	26.5571	1.03772
	Arkansas	5	2016	2016	605	2001457	30.228	27.8193	32.6367	1.22894	25.8391	23.7442	27.9341	1.06884
	Arkansas	5	2015	2015	605	1988763	30.4209	27.9968	32.845	1.23679	25.9596	23.8601	28.0591	1.07117
	Arkansas	5	2014	2014	576	1972786	29.1973	26.8128	31.5817	1.21655	25.2327	23.1401	27.3254	1.06768
	Arkansas	5	2013	2013	624	1961184	31.8175	29.321	34.314	1.27372	27.4508	25.2691	29.6325	1.11313
	Arkansas	5	2012	2012	611	1951558	31.3083	28.8258	33.7909	1.2666	27.3788	25.1798	29.5777	1.1219
	Arkansas	5	2011	2011	626	1941875	32.2369	29.7115	34.7622	1.28845	28.7903	26.5134	31.0672	1.16169
	Arkansas	5	2010	2010	638	1920338	33.2233	30.6453	35.8014	1.31532	29.9393	27.5947	32.2838	1.19618
	Arkansas	5	2009	2009	594	1907004	31.1483	28.6434	33.6533	1.27803	28.0236	25.7515	30.2957	1.15924
	Arkansas	5	2008	2008	636	1889994	33.6509	31.0356	36.2662	1.33434	30.6154	28.222	33.0089	1.22113
	Arkansas	5	2007	2007	595	1870588	31.8082	29.2523	34.364	1.30401	29.0112	26.6678	31.3545	1.1956
	Arkansas	5	2006	2006	557	1850037	30.1075	27.6071	32.6079	1.2757	27.7424	25.4283	30.0565	1.18067
	Arkansas	5	2005	2005	572	1816871	31.4827	28.9026	34.0628	1.31636	29.0003	26.6151	31.3855	1.21694
	Arkansas	5	2004	2004	617	1790741	34.455	31.7363	37.1737	1.38711	31.7253	29.2153	34.2353	1.28062
	Arkansas	5	2003	2003	631	1770115	35.6474	32.866	38.4288	1.4191	32.6652	30.1114	35.2189	1.30293
	Arkansas	5	2002	2002	609	1754926	34.7023	31.9461	37.4585	1.40621	32.0151	29.4681	34.5622	1.29951
	Arkansas	5	2001	2001	641	1743834	36.7581	33.9124	39.6037	1.45186	34.0032	31.3676	36.6388	1.34471
	Arkansas	5	2000	2000	626	1731293	36.1579	33.3254	38.9905	1.44516	33.5229	30.893	36.1529	1.34183
	Arkansas	5	1999	1999	622	1709833	36.3778	33.5189	39.2367	1.45862	33.4585	30.8253	36.0918	1.34351
															28.0015
	Arizona	4	2023	2023	1258	5143911	24.4561	23.1046	25.8076	0.68952	19.639	18.5251	20.7528	0.568307
	Arizona	4	2022	2022	1214	5050627	24.0366	22.6845	25.3888	0.689865	19.6144	18.483	20.7457	0.577207
	Arizona	4	2021	2021	1158	4976896	23.2675	21.9274	24.6077	0.683747	19.5419	18.3892	20.6945	0.588087
	Arizona	4	2020	2020	1172	5073314	23.1013	21.7787	24.4239	0.674795	18.7171	17.6206	19.8137	0.559454
	Arizona	4	2019	2019	1118	4944637	22.6104	21.285	23.9357	0.676218	18.4981	17.3914	19.6049	0.564654
	Arizona	4	2018	2018	1130	4841593	23.3394	21.9786	24.7003	0.694306	19.4589	18.3027	20.6152	0.589924
	Arizona	4	2017	2017	1125	4710337	23.8836	22.488	25.2793	0.712073	19.9525	18.7663	21.1387	0.605204
	Arizona	4	2016	2016	1068	4627311	23.0804	21.6961	24.4646	0.706248	19.2183	18.0463	20.3902	0.597934
	Arizona	4	2015	2015	1031	4532781	22.7454	21.357	24.1338	0.708377	19.4844	18.2775	20.6914	0.615795
	Arizona	4	2014	2014	1045	4437972	23.5468	22.1191	24.9745	0.728406	20.4324	19.1768	21.688	0.6406
	Arizona	4	2013	2013	1001	4343532	23.0458	21.6181	24.4734	0.728407	20.5398	19.2516	21.828	0.657245
	Arizona	4	2012	2012	971	4279410	22.69	21.2629	24.1172	0.728158	20.1755	18.8943	21.4567	0.653665
	Arizona	4	2011	2011	959	4212886	22.7635	21.3228	24.2042	0.735072	20.6961	19.3754	22.0168	0.673812
	Arizona	4	2010	2010	975	4129792	23.6089	22.127	25.0909	0.756091	21.8906	20.507	23.2742	0.70591
	Arizona	4	2009	2009	901	4086373	22.0489	20.6092	23.4886	0.734555	20.7506	19.387	22.1141	0.695683
	Arizona	4	2008	2008	912	4030260	22.6288	21.1602	24.0975	0.749315	21.5752	20.168	22.9823	0.717944
	Arizona	4	2007	2007	980	3953926	24.7855	23.2337	26.3373	0.791743	23.9349	22.4305	25.4393	0.767549
	Arizona	4	2006	2006	932	3862288	24.1308	22.5815	25.68	0.79043	23.5285	22.0125	25.0445	0.773462
	Arizona	4	2005	2005	927	3729568	24.8554	23.2554	26.4555	0.816359	24.1935	22.6304	25.7567	0.79752
	Arizona	4	2004	2004	877	3596754	24.3831	22.7693	25.9969	0.823359	23.8992	22.312	25.4865	0.809803
	Arizona	4	2003	2003	1010	3496834	28.8833	27.102	30.6646	0.908836	28.2628	26.515	30.0106	0.891743
	Arizona	4	2002	2002	898	3418910	26.2657	24.5477	27.9836	0.876497	26.024	24.3165	27.7315	0.871173
	Arizona	4	2001	2001	885	3338444	26.5094	24.7628	28.2559	0.891102	26.2325	24.4992	27.9657	0.88431
	Arizona	4	2000	2000	897	3249584	27.6035	25.7971	29.41	0.921655	27.4102	25.6106	29.2098	0.91817
	Arizona	4	1999	1999	865	3192500	27.0948	25.2891	28.9004	0.921249	26.9285	25.1265	28.7306	0.919418
															22.024
	Alaska	2	2023	2023	111	491668	22.5762	18.3762	26.7762	2.14284	23.7853	19.1284	28.4421	2.37595
	Alaska	2	2022	2022	96	488643	19.6462	15.9135	23.9914	2.00514	20.0623	16.0691	24.7469	2.1501
	Alaska	2	2021	2021	88	486413	18.0916	14.51	22.2894	1.92857	19.9883	15.8249	24.9114	2.24989
	Alaska	2	2020	2020	109	485337	22.4586	18.2424	26.6749	2.15115	24.559	19.7367	29.3814	2.46038
	Alaska	2	2019	2019	100	483410	20.6864	16.6318	24.7409	2.06864	21.6451	17.1587	26.1316	2.28901
	Alaska	2	2018	2018	93	483245	19.2449	15.5331	23.5763	1.9956	22.1464	17.6649	27.4188	2.4142
	Alaska	2	2017	2017	106	482658	21.9617	17.7808	26.1426	2.13311	24.5907	19.6042	29.5771	2.54411
	Alaska	2	2016	2016	95	479293	19.8209	16.0363	24.23	2.03358	23.5084	18.697	29.1801	2.59381
	Alaska	2	2015	2015	84	471543	17.8139	14.209	22.0548	1.94365	21.9897	17.2056	27.6922	2.58747
	Alaska	2	2014	2014	90	468422	19.2134	15.4499	23.6166	2.02527	24.411	19.2647	30.5096	2.78441
	Alaska	2	2013	2013	100	464673	21.5205	17.3025	25.7385	2.15205	25.3834	20.0017	30.7651	2.74576
	Alaska	2	2012	2012	88	464682	18.9377	15.1886	23.3318	2.01876	23.9623	18.8157	30.0825	2.77968
	Alaska	2	2011	2011	74	457541	16.1734	12.6997	20.3043	1.88012	21.3258	16.3874	27.2849	2.69615
	Alaska	2	2010	2010	89	447972	19.8673	15.955	24.4485	2.10593	26.9493	21.1972	33.7812	3.11145
	Alaska	2	2009	2009	77	439295	17.5281	13.8328	21.9071	1.99751	23.5042	18.1782	29.9032	2.90073
	Alaska	2	2008	2008	78	429125	18.1765	14.3678	22.6852	2.05809	27.5522	21.3527	34.9902	3.36475
	Alaska	2	2007	2007	81	421573	19.2138	15.2584	23.881	2.13486	29.8509	23.2702	37.7148	3.57443
	Alaska	2	2006	2006	69	415353	16.6124	12.9254	21.024	1.99989	26.1014	19.9182	33.5977	3.36784
	Alaska	2	2005	2005	60	408051	14.704	11.2208	18.927	1.89828	23.5385	17.5261	30.9489	3.28547
	Alaska	2	2004	2004	58	401069	14.4614	10.9811	18.6946	1.89887	25.4828	18.9737	33.5053	3.58329
	Alaska	2	2003	2003	67	393318	17.0346	13.2016	21.6332	2.0811	28.252	21.3978	36.6039	3.74865
	Alaska	2	2002	2002	68	388568	17.5002	13.5896	22.1856	2.12221	28.0856	21.2718	36.3883	3.70737
	Alaska	2	2001	2001	77	383169	20.0956	15.859	25.116	2.2901	34.4506	26.6441	43.8298	4.24183
	Alaska	2	2000	2000	64	378923	16.89	13.0073	21.5682	2.11125	35.558	26.7873	46.2837	4.77859
	Alaska	2	1999	1999	61	376602	16.1975	12.3898	20.8063	2.07387	32.2229	23.8389	42.6003	4.58703
															25.5562
	Alabama	1	2023	2023	1000	3497333	28.5932	26.821	30.3654	0.904197	23.546	22.0501	25.0419	0.763217
	Alabama	1	2022	2022	992	3470713	28.582	26.8034	30.3607	0.90748	23.6085	22.1034	25.1135	0.767886
	Alabama	1	2021	2021	923	3461132	26.6676	24.9471	28.388	0.877774	22.9864	21.4631	24.5096	0.77718
	Alabama	1	2020	2020	904	3386607	26.6934	24.9533	28.4335	0.887809	22.2201	20.7364	23.7038	0.756998
	Alabama	1	2019	2019	900	3364655	26.7487	25.0011	28.4962	0.891622	22.261	20.773	23.749	0.759166
	Alabama	1	2018	2018	952	3345373	28.4572	26.6495	30.2649	0.922304	23.9745	22.4185	25.5304	0.793854
	Alabama	1	2017	2017	965	3323045	29.0396	27.2074	30.8719	0.934819	24.8751	23.2741	26.476	0.816828
	Alabama	1	2016	2016	889	3306861	26.8835	25.1163	28.6507	0.901644	23.253	21.6934	24.8125	0.795686
	Alabama	1	2015	2015	963	3286823	29.2988	27.4483	31.1493	0.944141	25.8126	24.1536	27.4717	0.846441
	Alabama	1	2014	2014	877	3261970	26.8856	25.1062	28.665	0.907862	23.8798	22.2735	25.4862	0.819546
	Alabama	1	2013	2013	989	3236523	30.5575	28.653	32.462	0.971671	27.3572	25.6304	29.084	0.881012
	Alabama	1	2012	2012	919	3212676	28.6054	26.756	30.4549	0.943606	25.8184	24.1273	27.5095	0.862805
	Alabama	1	2011	2011	885	3190717	27.7367	25.9093	29.5641	0.932359	25.2627	23.5789	26.9464	0.859058
	Alabama	1	2010	2010	900	3168102	28.4082	26.5522	30.2642	0.946939	26.4336	24.6886	28.1785	0.890295
	Alabama	1	2009	2009	916	3146862	29.1084	27.2233	30.9934	0.961767	27.2245	25.4465	29.0025	0.907143
	Alabama	1	2008	2008	983	3112848	31.5788	29.6047	33.5529	1.00721	29.6901	27.8207	31.5596	0.953799
	Alabama	1	2007	2007	891	3077548	28.9516	27.0506	30.8527	0.969916	27.3531	25.5458	29.1604	0.922088
	Alabama	1	2006	2006	984	3043069	32.3358	30.3154	34.3562	1.03083	30.9993	29.0518	32.9468	0.993644
	Alabama	1	2005	2005	901	2994406	30.0894	28.1247	32.0542	1.00242	29.0355	27.1302	30.9408	0.972096
	Alabama	1	2004	2004	906	2959133	30.6171	28.6234	32.6108	1.01718	29.6891	27.7477	31.6304	0.990492
	Alabama	1	2003	2003	890	2933859	30.3355	28.3425	32.3285	1.01685	29.5441	27.5973	31.4909	0.993284
	Alabama	1	2002	2002	871	2912842	29.9021	27.9162	31.8879	1.01319	29.1015	27.1649	31.0381	0.988057
	Alabama	1	2001	2001	874	2899262	30.1456	28.147	32.1442	1.01969	29.5673	27.6044	31.5302	1.00149
	Alabama	1	2000	2000	892	2884066	30.9286	28.8989	32.9583	1.03556	30.4952	28.4919	32.4985	1.02208
	Alabama	1	1999	1999	844	2868102	29.4271	27.4418	31.4125	1.01292	29.2039	27.2314	31.1764	1.00636
															26.5277
