# Supplementary material for: Trends and Disparities in Colorectal and Anal Carcinoma- Related Mortality Among U.S. Adults (1999-2023) with Predictions Using Machine Learning
Source: Research Square preprint supplement (doi:10.21203/rs.3.rs-8106965/v1), 2025-12-18
Supplement: Supplementary file 3 [file 1e570c8c076e956ae0d6d954.xlsx]

## Sheet: Sheet1
Notes	Year	Year Code	Deaths	Population	Crude Rate	Crude Rate Lower 95% Confidence Interval	Crude Rate Upper 95% Confidence Interval	Crude Rate Standard Error	Age Adjusted Rate	Age Adjusted Rate Lower 95% Confidence Interval	Age Adjusted Rate Upper 95% Confidence Interval	Age Adjusted Rate Standard Error	% of Total Deaths
	1999	1999	57104	180408769	31.6526	31.3929	31.9122	0.132457	32.3281	32.0629	32.5933	0.135299	0.0424011
	2000	2000	57434	181984640	31.5598	31.3017	31.8179	0.131689	32.0898	31.8274	32.3523	0.133906	0.0426462
	2001	2001	56841	184305128	30.8407	30.5872	31.0942	0.129358	31.234	30.9772	31.4909	0.131026	0.0422059
	2002	2002	56688	186208028	30.4434	30.1928	30.694	0.127864	30.6064	30.3543	30.8585	0.128617	0.0420923
	2003	2003	55913	188090429	29.7267	29.4803	29.9731	0.125716	29.6905	29.4442	29.9369	0.12569	0.0415168
	2004	2004	53717	190205384	28.2416	28.0027	28.4804	0.121852	28.0712	27.8335	28.309	0.121306	0.0398862
	2005	2005	53198	192551384	27.6279	27.3932	27.8627	0.119785	27.2875	27.055	27.5199	0.118589	0.0395008
	2006	2006	53503	195019359	27.4347	27.2022	27.6672	0.118607	26.8931	26.6645	27.1217	0.116651	0.0397273
	2007	2007	53548	197403777	27.1261	26.8964	27.3559	0.117224	26.3276	26.1037	26.5516	0.114261	0.0397607
	2008	2008	53265	199795090	26.6598	26.4334	26.8862	0.115514	25.6972	25.4778	25.9166	0.111937	0.0395506
	2009	2009	52347	202107016	25.9006	25.6788	26.1225	0.113205	24.7168	24.5036	24.93	0.108781	0.038869
	2010	2010	52563	203891983	25.7798	25.5594	26.0002	0.112445	24.414	24.2036	24.6245	0.107367	0.0390293
	2011	2011	52227	206592936	25.2801	25.0633	25.497	0.11062	23.6113	23.4067	23.8159	0.10437	0.0387799
	2012	2012	51964	208826037	24.8839	24.6699	25.0978	0.109161	22.9815	22.7817	23.1813	0.101958	0.0385846
	2013	2013	52205	211085314	24.7317	24.5196	24.9439	0.108243	22.5524	22.3565	22.7483	0.0999493	0.0387635
	2014	2014	52180	213809280	24.4049	24.1955	24.6143	0.106838	22.0683	21.8763	22.2603	0.0979758	0.038745
	2015	2015	53134	216553817	24.5362	24.3275	24.7448	0.106444	21.9442	21.7547	22.1337	0.0966747	0.0394533
	2016	2016	53102	218641417	24.2873	24.0807	24.4938	0.105396	21.4879	21.3022	21.6736	0.0947621	0.0394296
	2017	2017	53406	221447331	24.1168	23.9123	24.3213	0.104358	21.1933	21.0105	21.3762	0.0932878	0.0396553
	2018	2018	53059	223311190	23.7601	23.5579	23.9623	0.10315	20.6472	20.4685	20.8258	0.0911312	0.0393976
	2019	2019	52948	224981167	23.5344	23.334	23.7349	0.102277	20.2345	20.0591	20.4099	0.0894803	0.0393152
	2020	2020	53048	226635013	23.4068	23.2076	23.606	0.101627	19.9525	19.7795	20.1255	0.0882585	0.0393895
	2021	2021	54073	228238412	23.6915	23.4918	23.8911	0.101883	20.6311	20.4537	20.8085	0.0904966	0.0401506
	2022	2022	54232	229508599	23.6296	23.4307	23.8285	0.101468	20.0416	19.8698	20.2135	0.0876751	0.0402686
	2023	2023	55057	231529762	23.7797	23.581	23.9783	0.101344	20.1499	19.9784	20.3214	0.0875152	0.0408812
