# Supplementary material for: Trends and Disparities in Colorectal and Anal Carcinoma- Related Mortality Among U.S. Adults (1999-2023) with Predictions Using Machine Learning
Source: Research Square preprint supplement (doi:10.21203/rs.3.rs-8106965/v1), 2025-12-18
Supplement: Supplementary file 4 [file 2a6855367f69cecd86307098.xlsx]

## Sheet: Sheet1
Metric	Measure	Start	End	APC	lower	upper	P
Census Region	Midwest	1999	2013	-2.7152	-2.8996	-2.5305	0
Census Region	Midwest	2013	2023	-1.243	-1.573	-0.9118	0
Census Region	Northeast	1999	2011	-3.5344	-3.7791	-3.2891	0
Census Region	Northeast	2011	2023	-2.3385	-2.6192	-2.057	0
Census Region	South	1999	2012	-2.3805	-2.5609	-2.1998	0
Census Region	South	2012	2020	-1.4163	-1.876	-0.9545	6e-06
Census Region	South	2020	2023	0.9435	-0.7485	2.6644	0.257337
Census Region	West	1999	2018	-2.1936	-2.3366	-2.0504	0
Census Region	West	2018	2023	0.4003	-0.6632	1.4752	0.443052
Race	Hispanic	1999	2016	-1.734	-1.9253	-1.5424	0
Race	Hispanic	2016	2023	-0.3846	-0.9525	0.1865	0.175074
Race	NH Black	1999	2019	-2.6573	-2.7914	-2.5231	0
Race	NH Black	2019	2023	-1.0997	-2.6387	0.4635	0.156887
Race	NH Other	1999	2023	-1.7266	-1.9132	-1.5396	0
Race	NH White	1999	2011	-2.7828	-2.9529	-2.6125	0
Race	NH White	2011	2020	-1.4936	-1.8345	-1.1514	0
Race	NH White	2020	2023	0.9076	-0.6994	2.5406	0.251405
Sex	Both	1999	2012	-2.6909	-2.8616	-2.5199	0
Sex	Both	2012	2019	-1.7304	-2.3017	-1.1557	8e-06
Sex	Both	2019	2023	-0.2029	-1.2761	0.882	0.696842
Sex	Female	1999	2012	-2.7264	-2.8929	-2.5597	0
Sex	Female	2012	2020	-1.7262	-2.1776	-1.2728	0
Sex	Female	2020	2023	0.4737	-1.2298	2.2066	0.567469
Sex	Male	1999	2002	-1.9728	-3.1708	-0.76	0.004423
Sex	Male	2002	2005	-3.965	-6.3296	-1.5408	0.00438
Sex	Male	2005	2013	-2.4614	-2.7885	-2.1333	0
Sex	Male	2013	2019	-1.8205	-2.3639	-1.274	1.6e-05
Sex	Male	2019	2023	-0.3782	-1.1424	0.3919	0.301962
State	Alabama	1999	2023	-1.3258	-1.5793	-1.0717	0
State	Alaska	1999	2023	-1.5815	-2.0994	-1.0608	2e-06
State	Arizona	1999	2015	-2.2664	-2.6973	-1.8335	0
State	Arizona	2015	2023	0.0739	-1.0705	1.2315	0.894814
State	Arkansas	1999	2020	-1.8425	-2.167	-1.517	0
State	Arkansas	2020	2023	3.5367	-3.0157	10.5316	0.28061
State	California	1999	2016	-2.2816	-2.4052	-2.1578	0
State	California	2016	2023	-0.5391	-1.0111	-0.0649	0.027919
State	Colorado	1999	2015	-2.8348	-3.3072	-2.3601	0
State	Colorado	2015	2023	-0.5924	-1.8885	0.7207	0.356208
State	Connecticut	1999	2011	-4.7369	-5.3043	-4.1662	0
State	Connecticut	2011	2023	-1.4324	-2.1017	-0.7586	0.000265
State	Delaware	1999	2023	-2.5936	-3.1068	-2.0777	0
State	District of Columbia	1999	2023	-3.1324	-3.7359	-2.5251	0
State	Florida	1999	2014	-2.4553	-2.7038	-2.2061	0
State	Florida	2014	2023	-0.9776	-1.5158	-0.4365	0.001231
State	Georgia	1999	2001	3.8587	-4.8735	13.3923	0.375776
State	Georgia	2001	2008	-2.9105	-4.292	-1.5091	0.000437
State	Georgia	2008	2023	-1.1756	-1.5066	-0.8434	1e-06
State	Hawaii	1999	2023	-1.3541	-1.8215	-0.8845	5e-06
State	Idaho	1999	2023	-1.2066	-1.5853	-0.8264	1e-06
State	Illinois	1999	2011	-3.0579	-3.4653	-2.6487	0
State	Illinois	2011	2023	-1.9241	-2.3747	-1.4714	0
State	Indiana	1999	2013	-2.8226	-3.2401	-2.4033	0
State	Indiana	2013	2023	-0.3441	-1.072	0.3891	0.338372
State	Iowa	1999	2023	-2.1487	-2.3595	-1.9375	0
State	Kansas	1999	2012	-2.3347	-2.9366	-1.729	0
State	Kansas	2012	2023	-0.7995	-1.6171	0.0248	0.056599
State	Kentucky	1999	2015	-2.309	-2.7882	-1.8275	0
State	Kentucky	2015	2023	0.322	-1.0571	1.7203	0.633348
State	Louisiana	1999	2023	-2.0339	-2.2593	-1.8079	0
State	Maine	1999	2013	-3.7082	-4.4528	-2.9578	0
State	Maine	2013	2023	-0.5825	-1.9837	0.8388	0.400802
State	Maryland	1999	2011	-3.6647	-4.2017	-3.1247	0
State	Maryland	2011	2023	-1.6321	-2.2064	-1.0544	1e-05
State	Massachusetts	1999	2012	-4.1203	-4.4895	-3.7497	0
State	Massachusetts	2012	2023	-2.7324	-3.2938	-2.1676	0
State	Michigan	1999	2018	-2.3638	-2.5171	-2.2103	0
State	Michigan	2018	2021	2.8655	-2.5968	8.6341	0.289887
State	Michigan	2021	2023	-4.3368	-9.4623	1.0788	0.1076
State	Minnesota	1999	2023	-2.2293	-2.5002	-1.9576	0
State	Mississippi	1999	2023	-1.1133	-1.3173	-0.9089	0
State	Missouri	1999	2019	-2.3653	-2.6406	-2.0893	0
State	Missouri	2019	2023	2.5004	-0.953	6.0743	0.148427
State	Montana	1999	2023	-1.935	-2.4511	-1.4162	0
State	Nebraska	1999	2016	-2.345	-2.801	-1.8869	0
State	Nebraska	2016	2023	-0.2236	-2.1016	1.6903	0.808341
State	Nevada	1999	2023	-2.0957	-2.4578	-1.7323	0
State	New Hampshire	1999	2023	-3.0458	-3.4567	-2.6332	0
State	New Jersey	1999	2023	-3.076	-3.2395	-2.9123	0
State	New Mexico	1999	2023	-1.6283	-1.9195	-1.3361	0
State	New York	1999	2006	-4.0047	-4.6162	-3.3892	0
State	New York	2006	2023	-2.7656	-2.9506	-2.5802	0
State	North Carolina	1999	2013	-2.8564	-3.2997	-2.4111	0
State	North Carolina	2013	2023	-0.855	-1.5779	-0.1268	0.023728
State	North Dakota	1999	2023	-2.1932	-2.6961	-1.6876	0
State	Ohio	1999	2011	-2.7444	-3.0706	-2.4172	0
State	Ohio	2011	2023	-1.7296	-2.0885	-1.3694	0
State	Oklahoma	1999	2010	-1.8507	-2.5919	-1.1038	5e-05
State	Oklahoma	2010	2023	-0.3974	-0.9794	0.188	0.171736
State	Oregon	1999	2023	-2.0092	-2.2759	-1.7418	0
State	Pennsylvania	1999	2005	-3.6634	-4.3691	-2.9524	0
State	Pennsylvania	2005	2020	-2.4053	-2.6276	-2.1826	0
State	Pennsylvania	2020	2023	-0.133	-2.6816	2.4823	0.914761
State	Rhode Island	1999	2023	-3.1177	-3.4535	-2.7807	0
State	South Carolina	1999	2018	-2.5044	-2.8673	-2.1402	0
State	South Carolina	2018	2023	0.7471	-1.9751	3.545	0.577139
State	South Dakota	1999	2023	-1.8951	-2.3727	-1.4152	0
State	Tennessee	1999	2020	-1.9207	-2.1956	-1.645	0
State	Tennessee	2020	2023	3.3108	-2.0199	8.9316	0.214337
State	Texas	1999	2015	-2.2194	-2.4312	-2.0072	0
State	Texas	2015	2023	0.1719	-0.3907	0.7377	0.531818
State	Utah	1999	2012	-2.9973	-4.0971	-1.8848	1.9e-05
State	Utah	2012	2023	0.0112	-1.3258	1.3664	0.98627
State	Vermont	1999	2023	-2.0938	-2.6131	-1.5717	0
State	Virginia	1999	2013	-3.1198	-3.4573	-2.7812	0
State	Virginia	2013	2023	-0.5192	-1.0822	0.0469	0.070098
State	Washington	1999	2014	-2.7303	-3.172	-2.2867	0
State	Washington	2014	2023	-0.2765	-1.2191	0.6751	0.549973
State	West Virginia	1999	2023	-1.5627	-1.914	-1.2101	0
State	Wisconsin	1999	2006	-4.2958	-5.386	-3.193	0
State	Wisconsin	2006	2023	-1.8847	-2.2061	-1.5622	0
State	Wyoming	1999	2017	-3.1999	-4.2085	-2.1806	3e-06
State	Wyoming	2017	2023	4.6128	-0.7742	10.2922	0.090394
Urbanization	Metropolitan	1999	2012	-2.851	-2.9969	-2.7049	0
Urbanization	Metropolitan	2012	2020	-1.8305	-2.1458	-1.5142	0
Urbanization	Nonmetropolitan	1999	2006	-2.4531	-2.9577	-1.9458	0
Urbanization	Nonmetropolitan	2006	2020	-1.3829	-1.5697	-1.1957	0
Age Groups	25-34 years	1999	2023	0.5314	0.1765	0.8875	0.005046
Age Groups	35-44 years	1999	2023	1.0093	0.8374	1.1816	0
Age Groups	45-54 years	1999	2001	2.7979	-2.0441	7.8792	0.24408
Age Groups	45-54 years	2001	2004	-3.7439	-8.0964	0.8147	0.099953
Age Groups	45-54 years	2004	2023	0.9473	0.8133	1.0815	0
Age Groups	55-64 years	1999	2005	-3.5064	-4.2797	-2.7268	0
Age Groups	55-64 years	2005	2013	-1.2491	-1.8364	-0.6582	0.000355
Age Groups	55-64 years	2013	2023	-0.0337	-0.3615	0.2952	0.831259
Age Groups	65-74 years	1999	2001	-0.9429	-2.5323	0.6724	0.223824
Age Groups	65-74 years	2001	2004	-4.9466	-6.5291	-3.3374	3.6e-05
Age Groups	65-74 years	2004	2014	-3.4294	-3.5855	-3.273	0
Age Groups	65-74 years	2014	2020	-1.844	-2.2165	-1.4701	0
Age Groups	65-74 years	2020	2023	0.2146	-0.5933	1.0289	0.571766
Age Groups	75-84 years	1999	2023	-3.1163	-3.203	-3.0295	0
Age Groups	85+ years	1999	2018	-2.9053	-3.0995	-2.7107	0
Age Groups	85+ years	2018	2023	0.1937	-1.3711	1.7833	0.800248
