# Supplementary material for: Trends and Disparities in Colorectal and Anal Carcinoma- Related Mortality Among U.S. Adults (1999-2023) with Predictions Using Machine Learning
Source: Research Square preprint supplement (doi:10.21203/rs.3.rs-8106965/v1), 2025-12-18
Supplement: Supplementary file 5 [file 43c10654b4b92c0611e1ff5e.xlsx]

## Sheet: Sheet1
Notes	Sex	Sex Code	Year	Year Code	Deaths	Population	Crude Rate	Crude Rate Lower 95% Confidence Interval	Crude Rate Upper 95% Confidence Interval	Crude Rate Standard Error	Age Adjusted Rate	Age Adjusted Rate Lower 95% Confidence Interval	Age Adjusted Rate Upper 95% Confidence Interval	Age Adjusted Rate Standard Error	% of Total Deaths
	Female	F	1999	1999	28892	94123092	30.696	30.342	31.0499	0.18059	27.5384	27.219	27.8578	0.162947	0.0443186
	Female	F	2000	2000	28998	94864102	30.5679	30.2161	30.9198	0.179507	27.3133	26.9971	27.6296	0.161349	0.0444812
	Female	F	2001	2001	28640	95984408	29.8382	29.4926	30.1838	0.176314	26.6574	26.3469	26.9679	0.158427	0.043932
	Female	F	2002	2002	28224	96927703	29.1186	28.7789	29.4583	0.173325	25.9332	25.629	26.2374	0.155226	0.0432939
	Female	F	2003	2003	27935	97893297	28.5362	28.2015	28.8708	0.170735	25.2683	24.9702	25.5663	0.152059	0.0428506
	Female	F	2004	2004	26822	98921524	27.1144	26.7899	27.4389	0.16556	23.9584	23.6699	24.247	0.147207	0.0411433
	Female	F	2005	2005	26389	100097839	26.3632	26.0451	26.6813	0.162288	23.2138	22.9317	23.4959	0.143917	0.0404791
	Female	F	2006	2006	26605	101328442	26.2562	25.9407	26.5717	0.160972	23.0458	22.7667	23.325	0.142418	0.0408105
	Female	F	2007	2007	26451	102513830	25.8024	25.4914	26.1133	0.158649	22.5243	22.2504	22.7982	0.139763	0.0405742
	Female	F	2008	2008	26200	103688156	25.2681	24.9621	25.574	0.156107	21.9557	21.6872	22.2243	0.137034	0.0401892
	Female	F	2009	2009	25407	104834186	24.2354	23.9374	24.5334	0.152046	20.9256	20.6653	21.1859	0.132808	0.0389728
	Female	F	2010	2010	25312	105717426	23.9431	23.6481	24.238	0.150493	20.5783	20.3214	20.8352	0.131053	0.0388271
	Female	F	2011	2011	25289	107004480	23.6336	23.3423	23.9249	0.148615	20.1124	19.8605	20.3643	0.12851	0.0387918
	Female	F	2012	2012	24967	108088829	23.0986	22.8121	23.3851	0.146185	19.4643	19.2189	19.7098	0.12523	0.0382979
	Female	F	2013	2013	24882	109172782	22.7914	22.5082	23.0746	0.144487	19.0665	18.8253	19.3078	0.123099	0.0381675
	Female	F	2014	2014	24909	110581619	22.5254	22.2457	22.8052	0.142723	18.7245	18.4873	18.9617	0.121019	0.0382089
	Female	F	2015	2015	25351	111947362	22.6455	22.3667	22.9242	0.142228	18.6985	18.4633	18.9336	0.119983	0.0388869
	Female	F	2016	2016	25187	112990913	22.2912	22.0159	22.5665	0.140457	18.3022	18.0709	18.5335	0.118009	0.0386353
	Female	F	2017	2017	25338	114358026	22.1567	21.8839	22.4296	0.139194	18.0367	17.8095	18.2638	0.115895	0.038867
	Female	F	2018	2018	24784	115265998	21.5016	21.2339	21.7693	0.136579	17.3339	17.113	17.5549	0.112724	0.0380172
	Female	F	2019	2019	24876	116084432	21.4292	21.1629	21.6955	0.135868	17.1212	16.9033	17.339	0.111155	0.0381583
	Female	F	2020	2020	24571	116909132	21.0172	20.7544	21.28	0.13408	16.6967	16.4827	16.9108	0.109205	0.0376904
	Female	F	2021	2021	25190	116838617	21.5597	21.2934	21.8259	0.13584	17.5771	17.3552	17.799	0.113209	0.0386399
	Female	F	2022	2022	25224	117317971	21.5005	21.2352	21.7659	0.135376	16.9973	16.7821	17.2125	0.109808	0.0386921
	Female	F	2023	2023	25473	118635845	21.4716	21.2079	21.7353	0.134532	17.0943	16.8795	17.3091	0.109596	0.0390741
Total	Female
	Male	M	1999	1999	28212	86285677	32.696	32.3145	33.0776	0.194661	39.0881	38.6232	39.553	0.237176	0.0406022
	Male	M	2000	2000	28436	87120538	32.6398	32.2605	33.0192	0.193559	38.7926	38.3337	39.2515	0.234129	0.0409245
	Male	M	2001	2001	28201	88320720	31.9302	31.5575	32.3029	0.190138	37.5657	37.1195	38.012	0.227657	0.0405863
	Male	M	2002	2002	28464	89280325	31.8816	31.5112	32.252	0.18897	36.9934	36.5559	37.4309	0.223228	0.0409648
	Male	M	2003	2003	27978	90197132	31.0187	30.6553	31.3822	0.185445	35.7161	35.2901	36.1421	0.217345	0.0402654
	Male	M	2004	2004	26895	91283860	29.463	29.1109	29.8152	0.179656	33.623	33.2139	34.0321	0.208734	0.0387068
	Male	M	2005	2005	26809	92453545	28.9973	28.6502	29.3444	0.177099	32.7332	32.3345	33.1319	0.203421	0.038583
	Male	M	2006	2006	26898	93690917	28.7093	28.3662	29.0524	0.17505	31.9757	31.5871	32.3643	0.198282	0.0387111
	Male	M	2007	2007	27097	94889947	28.5562	28.2162	28.8963	0.173476	31.3112	30.9321	31.6904	0.193441	0.0389975
	Male	M	2008	2008	27065	96106934	28.1613	27.8258	28.4968	0.171179	30.4568	30.0878	30.8258	0.188268	0.0389514
	Male	M	2009	2009	26940	97272830	27.6953	27.3646	28.026	0.168736	29.5404	29.1813	29.8995	0.183205	0.0387715
	Male	M	2010	2010	27251	98174557	27.7577	27.4281	28.0873	0.168148	29.3488	28.9939	29.7038	0.181089	0.0392191
	Male	M	2011	2011	26938	99588456	27.0493	26.7263	27.3723	0.164806	28.0272	27.6862	28.3682	0.173987	0.0387686
	Male	M	2012	2012	26997	100737208	26.7994	26.4797	27.1191	0.163105	27.3244	26.9923	27.6566	0.169472	0.0388535
	Male	M	2013	2013	27323	101912532	26.8102	26.4923	27.1281	0.162195	26.882	26.5569	27.207	0.16582	0.0393227
	Male	M	2014	2014	27271	103227661	26.4183	26.1048	26.7319	0.159976	26.1574	25.8406	26.4742	0.16163	0.0392479
	Male	M	2015	2015	27783	104606455	26.5595	26.2472	26.8719	0.159342	25.933	25.6216	26.2444	0.158867	0.0399847
	Male	M	2016	2016	27915	105650504	26.422	26.1121	26.732	0.158142	25.4144	25.1098	25.719	0.155403	0.0401747
	Male	M	2017	2017	28068	107089305	26.2099	25.9033	26.5165	0.156444	24.9667	24.6684	25.265	0.152211	0.0403949
	Male	M	2018	2018	28275	108045192	26.1696	25.8646	26.4746	0.155631	24.6345	24.3416	24.9274	0.149449	0.0406928
	Male	M	2019	2019	28072	108896735	25.7786	25.477	26.0801	0.153859	23.8805	23.5954	24.1655	0.145431	0.0404007
	Male	M	2020	2020	28477	109725881	25.9529	25.6514	26.2543	0.153794	23.7694	23.4876	24.0513	0.143801	0.0409835
	Male	M	2021	2021	28883	111399795	25.9273	25.6283	26.2264	0.152559	24.1516	23.8654	24.4379	0.146054	0.0415678
	Male	M	2022	2022	29008	112190628	25.856	25.5584	26.1535	0.151811	23.5907	23.313	23.8685	0.141718	0.0417477
	Male	M	2023	2023	29584	112893917	26.2051	25.9065	26.5037	0.152355	23.6829	23.4065	23.9593	0.141002	0.0425767
