# Supplementary material for: Trends and Disparities in Colorectal and Anal Carcinoma- Related Mortality Among U.S. Adults (1999-2023) with Predictions Using Machine Learning
Source: Research Square preprint supplement (doi:10.21203/rs.3.rs-8106965/v1), 2025-12-18
Supplement: Supplementary file 6 [file 51c8d74c1dde3aeb9ab465c3.xlsx]

## Sheet: Sheet1
Metric	Measure	AAPC	lower	upper	P
Census Region	Midwest	-2.1045	-2.2681	-1.9406	0
Census Region	Northeast	-2.9383	-3.1132	-2.7631	0
Census Region	South	-1.6494	-1.9058	-1.3923	0
Census Region	West	-1.6588	-1.8897	-1.4273	0
Race	Hispanic	-1.3424	-1.5428	-1.1415	0
Race	NH Black	-2.3995	-2.6609	-2.1373	0
Race	NH Other	-1.7266	-1.9132	-1.5396	0
Race	NH White	-1.8453	-2.0772	-1.6128	0
Sex	Both	-2.0002	-2.2415	-1.7583	0
Sex	Female	-1.9985	-2.2521	-1.7441	0
Sex	Male	-2.0859	-2.4437	-1.7268	0
State	Alabama	-1.3258	-1.5793	-1.0717	0
State	Alaska	-1.5815	-2.0994	-1.0608	2e-06
State	Arizona	-1.4924	-1.939	-1.0439	0
State	Arkansas	-1.1857	-1.9875	-0.3774	0.004109
State	California	-1.7765	-1.9289	-1.624	0
State	Colorado	-2.093	-2.593	-1.5904	0
State	Connecticut	-3.0988	-3.5104	-2.6854	0
State	Delaware	-2.5936	-3.1068	-2.0777	0
State	District of Columbia	-3.1324	-3.7359	-2.5251	0
State	Florida	-1.9037	-2.1424	-1.6646	0
State	Georgia	-1.2768	-2.0702	-0.4771	0.001798
State	Hawaii	-1.3541	-1.8215	-0.8845	5e-06
State	Idaho	-1.2066	-1.5853	-0.8264	1e-06
State	Illinois	-2.4926	-2.7781	-2.2063	0
State	Indiana	-1.7975	-2.1617	-1.4319	0
State	Iowa	-2.1487	-2.3595	-1.9375	0
State	Kansas	-1.634	-2.1006	-1.1653	0
State	Kentucky	-1.4398	-1.9625	-0.9143	0
State	Louisiana	-2.0339	-2.2593	-1.8079	0
State	Maine	-2.4179	-3.0985	-1.7325	0
State	Maryland	-2.6537	-3.0232	-2.2828	0
State	Massachusetts	-3.4866	-3.7924	-3.1799	0
State	Michigan	-1.892	-2.6468	-1.1313	1e-06
State	Minnesota	-2.2293	-2.5002	-1.9576	0
State	Mississippi	-1.1133	-1.3173	-0.9089	0
State	Missouri	-1.5707	-2.1404	-0.9977	0
State	Montana	-1.935	-2.4511	-1.4162	0
State	Nebraska	-1.731	-2.3255	-1.1329	0
State	Nevada	-2.0957	-2.4578	-1.7323	0
State	New Hampshire	-3.0458	-3.4567	-2.6332	0
State	New Jersey	-3.076	-3.2395	-2.9123	0
State	New Mexico	-1.6283	-1.9195	-1.3361	0
State	New York	-3.1286	-3.3378	-2.919	0
State	North Carolina	-2.0275	-2.3997	-1.6538	0
State	North Dakota	-2.1932	-2.6961	-1.6876	0
State	Ohio	-2.2384	-2.4662	-2.01	0
State	Oklahoma	-1.0661	-1.5026	-0.6277	2e-06
State	Oregon	-2.0092	-2.2759	-1.7418	0
State	Pennsylvania	-2.4411	-2.8013	-2.0796	0
State	Rhode Island	-3.1177	-3.4535	-2.7807	0
State	South Carolina	-1.8358	-2.4266	-1.2414	0
State	South Dakota	-1.8951	-2.3727	-1.4152	0
State	Tennessee	-1.2815	-1.9345	-0.6242	0.000139
State	Texas	-1.4287	-1.6479	-1.209	0
State	Utah	-1.6298	-2.4333	-0.8196	8.6e-05
State	Vermont	-2.0938	-2.6131	-1.5717	0
State	Virginia	-2.0446	-2.3314	-1.7571	0
State	Washington	-1.8173	-2.2369	-1.3959	0
State	West Virginia	-1.5627	-1.914	-1.2101	0
State	Wisconsin	-2.5941	-2.9659	-2.2209	0
State	Wyoming	-1.3032	-2.7188	0.133	0.075137
Urbanization	Metropolitan	-2.4635	-2.6028	-2.324	0
Urbanization	Nonmetropolitan	-1.7409	-1.9362	-1.5452	0
Age Groups	25-34 years	0.5314	0.1765	0.8875	0.005046
Age Groups	35-44 years	1.0093	0.8374	1.1816	0
Age Groups	45-54 years	0.5007	-0.1621	1.1678	0.139021
Age Groups	55-64 years	-1.3166	-1.6043	-1.0281	0
Age Groups	65-74 years	-2.572	-2.8261	-2.3172	0
Age Groups	75-84 years	-3.1163	-3.203	-3.0295	0
Age Groups	85+ years	-2.2677	-2.6016	-1.9326	0
