# Supplementary material for: Trends and Disparities in Colorectal and Anal Carcinoma- Related Mortality Among U.S. Adults (1999-2023) with Predictions Using Machine Learning
Source: Research Square preprint supplement (doi:10.21203/rs.3.rs-8106965/v1), 2025-12-18
Supplement: Supplementary file 7 [file 52378be1ff34ff4d86790bdc.xlsx]

## Sheet: Sheet1
Measure	percent.change	aaa
District of Columbia	-42.2535	-42.25%
Massachusetts	-40.3141	-40.31%
Rhode Island	-38.4892	-38.49%
New York	-33.9856	-33.99%
Connecticut	-33.2474	-33.25%
Pennsylvania	-29.8847	-29.88%
New Jersey	-29.7084	-29.71%
Ohio	-25.5607	-25.56%
Illinois	-24.9365	-24.94%
Iowa	-24.1144	-24.11%
Maine	-22.8228	-22.82%
Wisconsin	-21.0256	-21.03%
Nebraska	-19.9017	-19.90%
New Hampshire	-18.8889	-18.89%
West Virginia	-15.7692	-15.77%
Kansas	-15.5822	-15.58%
Michigan	-13.5602	-13.56%
Maryland	-12.6523	-12.65%
North Dakota	-10.3448	-10.34%
Missouri	-9.96139	-9.96%
Vermont	-6.56934	-6.57%
Indiana	-6.4121	-6.41%
Minnesota	-6.01336	-6.01%
Louisiana	-5.34591	-5.35%
Oregon	-3.77358	-3.77%
South Dakota	-1.62162	-1.62%
Delaware	-1.0929	-1.09%
Arkansas	1.92926	1.93%
Wyoming	6.38298	6.38%
Florida	7.69037	7.69%
California	8.54203	8.54%
Montana	8.64865	8.65%
Oklahoma	9.60758	9.61%
South Carolina	12.1027	12.10%
Virginia	12.9376	12.94%
Washington	14.1851	14.19%
Mississippi	16.609	16.61%
North Carolina	17.1617	17.16%
Kentucky	18.3508	18.35%
Alabama	18.4834	18.48%
Colorado	23.5099	23.51%
New Mexico	30.8824	30.88%
Tennessee	31.0249	31.02%
Idaho	35.023	35.02%
Texas	35.9076	35.91%
Georgia	41.0235	41.02%
Arizona	45.4335	45.43%
Utah	50.2058	50.21%
Hawaii	52.071	52.07%
Nevada	53.6785	53.68%
Alaska	81.9672	81.97%
