# Supplementary material for: Trends and Disparities in Colorectal and Anal Carcinoma- Related Mortality Among U.S. Adults (1999-2023) with Predictions Using Machine Learning
Source: Research Square preprint supplement (doi:10.21203/rs.3.rs-8106965/v1), 2025-12-18
Supplement: Supplementary file 8 [file 5a959c94cc667cb247f28769.xlsx]

## Sheet: Sheet1
Notes	Census Region	Census Region Code	Year	Year Code	Deaths	Population	Crude Rate	Crude Rate Lower 95% Confidence Interval	Crude Rate Upper 95% Confidence Interval	Crude Rate Standard Error	Age Adjusted Rate	Age Adjusted Rate Lower 95% Confidence Interval	Age Adjusted Rate Upper 95% Confidence Interval	Age Adjusted Rate Standard Error	% of Total Deaths
	Census Region 1: Northeast	CENS-R1	1999	1999	13108	35633134	36.786	36.1562	37.4157	0.321303	35.2558	34.6519	35.8597	0.308123	0.0110766
	Census Region 1: Northeast	CENS-R1	2000	2000	13003	35788687	36.3327	35.7082	36.9572	0.318622	34.603	34.0078	35.1981	0.30365	0.0109879
	Census Region 1: Northeast	CENS-R1	2001	2001	12584	36006250	34.9495	34.3388	35.5601	0.311553	33.1596	32.5797	33.7394	0.295844	0.0106338
	Census Region 1: Northeast	CENS-R1	2002	2002	12478	36185082	34.4838	33.8788	35.0889	0.308704	32.5012	31.9303	33.0721	0.291287	0.0105442
	Census Region 1: Northeast	CENS-R1	2003	2003	12024	36346948	33.0812	32.4899	33.6725	0.301687	30.9416	30.3876	31.4956	0.282662	0.0101606
	Census Region 1: Northeast	CENS-R1	2004	2004	11389	36462699	31.2347	30.661	31.8083	0.292681	28.992	28.4583	29.5258	0.272306	0.00962401
	Census Region 1: Northeast	CENS-R1	2005	2005	11024	36559788	30.1533	29.5905	30.7162	0.287188	27.739	27.2195	28.2586	0.265065	0.00931558
	Census Region 1: Northeast	CENS-R1	2006	2006	10966	36682176	29.8946	29.3351	30.4542	0.285476	27.3642	26.8496	27.8788	0.262547	0.00926657
	Census Region 1: Northeast	CENS-R1	2007	2007	10762	36846338	29.2078	28.656	29.7596	0.281548	26.5507	26.0461	27.0553	0.257458	0.00909418
	Census Region 1: Northeast	CENS-R1	2008	2008	10562	37084149	28.4812	27.938	29.0243	0.277131	25.6869	25.1937	26.1801	0.251638	0.00892518
	Census Region 1: Northeast	CENS-R1	2009	2009	10334	37339597	27.6757	27.1421	28.2093	0.272248	24.7906	24.3086	25.2725	0.245899	0.00873251
	Census Region 1: Northeast	CENS-R1	2010	2010	10316	37543347	27.4776	26.9473	28.0078	0.270535	24.3609	23.886	24.8358	0.242306	0.0087173
	Census Region 1: Northeast	CENS-R1	2011	2011	9897	37864117	26.1382	25.6232	26.6532	0.262739	23.0121	22.5529	23.4713	0.234285	0.00836323
	Census Region 1: Northeast	CENS-R1	2012	2012	9908	38158527	25.9654	25.4541	26.4766	0.260856	22.6896	22.2366	23.1426	0.231122	0.00837253
	Census Region 1: Northeast	CENS-R1	2013	2013	9767	38437194	25.4103	24.9063	25.9142	0.257116	22.0546	21.6099	22.4994	0.226907	0.00825338
	Census Region 1: Northeast	CENS-R1	2014	2014	9560	38710627	24.6961	24.201	25.1911	0.25258	21.1684	20.7364	21.6005	0.220418	0.00807846
	Census Region 1: Northeast	CENS-R1	2015	2015	9637	38965872	24.7319	24.2381	25.2257	0.251934	21.1389	20.7087	21.5692	0.219518	0.00814353
	Census Region 1: Northeast	CENS-R1	2016	2016	9515	39040202	24.3723	23.8826	24.862	0.249857	20.6935	20.2691	21.118	0.216559	0.00804043
	Census Region 1: Northeast	CENS-R1	2017	2017	9465	39417175	24.0124	23.5286	24.4961	0.246817	20.0872	19.6735	20.5008	0.211038	0.00799818
	Census Region 1: Northeast	CENS-R1	2018	2018	9200	39321978	23.3966	22.9185	23.8747	0.243926	19.4079	19.0025	19.8133	0.206854	0.00777425
	Census Region 1: Northeast	CENS-R1	2019	2019	8955	39381333	22.7392	22.2682	23.2102	0.240294	18.5943	18.2002	18.9884	0.201075	0.00756722
	Census Region 1: Northeast	CENS-R1	2020	2020	9029	39418559	22.9055	22.433	23.3779	0.241057	18.6084	18.2151	19.0018	0.200687	0.00762975
	Census Region 1: Northeast	CENS-R1	2021	2021	8852	40339548	21.9437	21.4866	22.4009	0.233233	18.2454	17.8562	18.6346	0.198559	0.0274551
	Census Region 1: Northeast	CENS-R1	2022	2022	8667	40289184	21.512	21.0591	21.9649	0.231071	17.4013	17.0261	17.7764	0.191391	0.0268813
	Census Region 1: Northeast	CENS-R1	2023	2023	8894	40402747	22.0134	21.5559	22.4709	0.23342	17.8392	17.4596	18.2188	0.193678	0.0275854
Total					259896
	Census Region 2: Midwest	CENS-R2	1999	1999	14398	41293967	34.8671	34.2975	35.4366	0.290579	34.24	33.6805	34.7995	0.285446	0.0121667
	Census Region 2: Midwest	CENS-R2	2000	2000	14075	41504992	33.9116	33.3513	34.4718	0.285841	33.2408	32.6915	33.7902	0.28029	0.0118938
	Census Region 2: Midwest	CENS-R2	2001	2001	13959	41762990	33.4243	32.8698	33.9788	0.282902	32.5424	32.0022	33.0825	0.275576	0.0117957
	Census Region 2: Midwest	CENS-R2	2002	2002	13809	41970731	32.9015	32.3527	33.4503	0.279985	31.8438	31.3122	32.3753	0.271212	0.011669
	Census Region 2: Midwest	CENS-R2	2003	2003	13595	42200881	32.215	31.6734	32.7565	0.276292	30.9281	30.4075	31.4488	0.265642	0.0114881
	Census Region 2: Midwest	CENS-R2	2004	2004	13005	42455980	30.6317	30.1053	31.1582	0.268606	29.2241	28.7208	29.7273	0.256763	0.0109896
	Census Region 2: Midwest	CENS-R2	2005	2005	12766	42748579	29.863	29.3449	30.381	0.264305	28.3193	27.8266	28.812	0.251355	0.0107876
	Census Region 2: Midwest	CENS-R2	2006	2006	12912	43084311	29.9691	29.4522	30.4861	0.263741	28.1599	27.6723	28.6476	0.24882	0.010911
	Census Region 2: Midwest	CENS-R2	2007	2007	12753	43424366	29.3683	28.8586	29.878	0.260059	27.3553	26.8781	27.8325	0.243468	0.0107766
	Census Region 2: Midwest	CENS-R2	2008	2008	12679	43718509	29.0014	28.4966	29.5063	0.257559	26.8525	26.3821	27.3229	0.239997	0.0107141
	Census Region 2: Midwest	CENS-R2	2009	2009	12267	44010460	27.8729	27.3797	28.3662	0.251659	25.521	25.0658	25.9762	0.232231	0.0103659
	Census Region 2: Midwest	CENS-R2	2010	2010	12335	44248465	27.8767	27.3847	28.3686	0.250999	25.4079	24.9554	25.8605	0.230902	0.0104234
	Census Region 2: Midwest	CENS-R2	2011	2011	12204	44584105	27.373	26.8873	27.8586	0.247783	24.6986	24.2552	25.142	0.226241	0.0103127
	Census Region 2: Midwest	CENS-R2	2012	2012	12019	44817227	26.8178	26.3384	27.2973	0.244618	23.8494	23.4174	24.2813	0.220368	0.0101564
	Census Region 2: Midwest	CENS-R2	2013	2013	12095	45090597	26.8238	26.3457	27.3018	0.243903	23.6748	23.2466	24.1031	0.218504	0.0102206
	Census Region 2: Midwest	CENS-R2	2014	2014	12026	45360409	26.5121	26.0383	26.986	0.24176	23.1853	22.764	23.6066	0.214957	0.0101623
	Census Region 2: Midwest	CENS-R2	2015	2015	12071	45628315	26.4551	25.9831	26.927	0.240789	22.8209	22.4064	23.2354	0.211488	0.0102003
	Census Region 2: Midwest	CENS-R2	2016	2016	11948	45802491	26.0859	25.6182	26.5537	0.238648	22.2302	21.8241	22.6364	0.207235	0.0100964
	Census Region 2: Midwest	CENS-R2	2017	2017	11898	46143783	25.7846	25.3213	26.2479	0.236387	21.9105	21.5088	22.3122	0.204968	0.0100541
	Census Region 2: Midwest	CENS-R2	2018	2018	11991	46405110	25.8398	25.3773	26.3023	0.235973	21.73	21.333	22.127	0.202573	0.0101327
	Census Region 2: Midwest	CENS-R2	2019	2019	11739	46589364	25.1967	24.7409	25.6525	0.232557	20.9383	20.5515	21.3251	0.197342	0.00991977
	Census Region 2: Midwest	CENS-R2	2020	2020	11779	46721679	25.211	24.7557	25.6663	0.232293	20.9185	20.5317	21.3053	0.19734	0.00995357
	Census Region 2: Midwest	CENS-R2	2021	2021	11995	47032092	25.5039	25.0474	25.9603	0.232866	21.7242	21.3263	22.122	0.202974	0.0372034
	Census Region 2: Midwest	CENS-R2	2022	2022	11858	47087294	25.183	24.7297	25.6363	0.231261	20.7999	20.417	21.1828	0.195369	0.0367785
	Census Region 2: Midwest	CENS-R2	2023	2023	11833	47312396	25.0104	24.5597	25.461	0.229918	20.6671	20.2865	21.0477	0.194182	0.0367009
Total					314009
	Census Region 3: South	CENS-R3	1999	1999	19687	64108630	30.7088	30.2798	31.1378	0.218863	31.5833	31.1418	32.0249	0.225291	0.016636
	Census Region 3: South	CENS-R3	2000	2000	20272	64843390	31.263	30.8327	31.6934	0.219575	32.1062	31.6639	32.5485	0.225647	0.0171304
	Census Region 3: South	CENS-R3	2001	2001	20110	65874012	30.528	30.106	30.9499	0.215274	31.2287	30.7967	31.6607	0.220409	0.0169935
	Census Region 3: South	CENS-R3	2002	2002	20227	66758178	30.2989	29.8814	30.7165	0.21304	30.8263	30.4009	31.2518	0.217079	0.0170924
	Census Region 3: South	CENS-R3	2003	2003	19862	67639133	29.3647	28.9563	29.773	0.20836	29.7283	29.3139	30.1426	0.211388	0.0167839
	Census Region 3: South	CENS-R3	2004	2004	19365	68718205	28.1803	27.7834	28.5772	0.202506	28.4429	28.0412	28.8447	0.204983	0.0163639
	Census Region 3: South	CENS-R3	2005	2005	19327	69951038	27.6293	27.2398	28.0189	0.198741	27.7098	27.3178	28.1019	0.200004	0.0163318
	Census Region 3: South	CENS-R3	2006	2006	19554	71198336	27.4641	27.0792	27.8491	0.196403	27.3154	26.9309	27.6998	0.19617	0.0165237
	Census Region 3: South	CENS-R3	2007	2007	19804	72387467	27.3583	26.9773	27.7394	0.194408	26.9513	26.5739	27.3286	0.192516	0.0167349
	Census Region 3: South	CENS-R3	2008	2008	19863	73529724	27.0136	26.6379	27.3892	0.191672	26.3974	26.0281	26.7666	0.188391	0.0167848
	Census Region 3: South	CENS-R3	2009	2009	19530	74596130	26.181	25.8138	26.5482	0.187342	25.359	25.0007	25.7172	0.182784	0.0165034
	Census Region 3: South	CENS-R3	2010	2010	19618	75419767	26.0117	25.6478	26.3757	0.185713	24.9897	24.6372	25.3423	0.179879	0.0165777
	Census Region 3: South	CENS-R3	2011	2011	19615	76650163	25.5903	25.2322	25.9484	0.182718	24.2008	23.8588	24.5427	0.174461	0.0165752
	Census Region 3: South	CENS-R3	2012	2012	19697	77681893	25.356	25.0019	25.7101	0.180668	23.6908	23.3563	24.0253	0.170661	0.0166445
	Census Region 3: South	CENS-R3	2013	2013	19937	78693557	25.335	24.9833	25.6867	0.179428	23.3896	23.0611	23.7182	0.167635	0.0168473
	Census Region 3: South	CENS-R3	2014	2014	20115	79945474	25.1609	24.8132	25.5086	0.177405	22.9485	22.6271	23.2698	0.163944	0.0169977
	Census Region 3: South	CENS-R3	2015	2015	20609	81260812	25.3615	25.0153	25.7078	0.176664	22.8867	22.5698	23.2036	0.16167	0.0174152
	Census Region 3: South	CENS-R3	2016	2016	20846	82405493	25.2969	24.9534	25.6403	0.175209	22.5671	22.256	22.8783	0.158735	0.0176154
	Census Region 3: South	CENS-R3	2017	2017	21001	83659214	25.103	24.7635	25.4426	0.173223	22.2429	21.9372	22.5486	0.155956	0.0177464
	Census Region 3: South	CENS-R3	2018	2018	20968	84717024	24.7506	24.4156	25.0856	0.170926	21.6965	21.3981	21.9948	0.152221	0.0177185
	Census Region 3: South	CENS-R3	2019	2019	21173	85606773	24.7329	24.3997	25.066	0.169974	21.4256	21.1321	21.7191	0.149728	0.0178918
	Census Region 3: South	CENS-R3	2020	2020	21137	86611804	24.4043	24.0753	24.7333	0.167859	20.9053	20.6184	21.1923	0.146385	0.0178613
	Census Region 3: South	CENS-R3	2021	2021	21725	86926028	24.9925	24.6602	25.3249	0.169563	21.8138	21.518	22.1097	0.150923	0.0673817
	Census Region 3: South	CENS-R3	2022	2022	22134	87978320	25.1585	24.827	25.4899	0.169104	21.476	21.188	21.7639	0.146916	0.0686502
	Census Region 3: South	CENS-R3	2023	2023	22690	89219544	25.4316	25.1007	25.7626	0.168833	21.7245	21.4367	22.0124	0.146857	0.0703747
Total					508866
	Census Region 4: West	CENS-R4	1999	1999	9911	39373038	25.172	24.6765	25.6676	0.252848	28.0805	27.5269	28.6341	0.282457	0.00837506
	Census Region 4: West	CENS-R4	2000	2000	10084	39847571	25.3064	24.8125	25.8004	0.252008	28.0872	27.5383	28.6361	0.280049	0.00852125
	Census Region 4: West	CENS-R4	2001	2001	10188	40661876	25.0554	24.5689	25.5419	0.248232	27.6056	27.0687	28.1425	0.273936	0.00860914
	Census Region 4: West	CENS-R4	2002	2002	10174	41294037	24.6379	24.1592	25.1167	0.244263	26.9408	26.4162	27.4654	0.267642	0.00859731
	Census Region 4: West	CENS-R4	2003	2003	10432	41903467	24.8953	24.4176	25.3731	0.243744	26.9591	26.4404	27.4778	0.264649	0.00881532
	Census Region 4: West	CENS-R4	2004	2004	9958	42568500	23.3929	22.9334	23.8524	0.234422	25.1672	24.6712	25.6632	0.253046	0.00841478
	Census Region 4: West	CENS-R4	2005	2005	10081	43291979	23.2861	22.8315	23.7406	0.231923	24.7731	24.2875	25.2587	0.247748	0.00851872
	Census Region 4: West	CENS-R4	2006	2006	10071	44054536	22.8603	22.4138	23.3068	0.227796	24.1222	23.6487	24.5958	0.241623	0.00851027
	Census Region 4: West	CENS-R4	2007	2007	10229	44745606	22.8603	22.4173	23.3034	0.22603	23.8783	23.4127	24.3439	0.237544	0.00864378
	Census Region 4: West	CENS-R4	2008	2008	10161	45462708	22.3502	21.9156	22.7848	0.221724	23.0631	22.6112	23.5149	0.230532	0.00858632
	Census Region 4: West	CENS-R4	2009	2009	10216	46160829	22.1313	21.7022	22.5605	0.218961	22.5367	22.0957	22.9777	0.225005	0.0086328
	Census Region 4: West	CENS-R4	2010	2010	10294	46680404	22.0521	21.6261	22.4781	0.217349	22.2364	21.8025	22.6703	0.221364	0.00869871
	Census Region 4: West	CENS-R4	2011	2011	10511	47494551	22.131	21.7079	22.5541	0.215863	21.8678	21.4447	22.2909	0.215867	0.00888208
	Census Region 4: West	CENS-R4	2012	2012	10340	48168390	21.4664	21.0526	21.8801	0.211105	20.9613	20.5521	21.3705	0.20877	0.00873758
	Census Region 4: West	CENS-R4	2013	2013	10406	48863966	21.2959	20.8867	21.705	0.208763	20.5163	20.1168	20.9158	0.203816	0.00879335
	Census Region 4: West	CENS-R4	2014	2014	10479	49792770	21.0452	20.6423	21.4482	0.205586	20.1178	19.7271	20.5085	0.199336	0.00885504
	Census Region 4: West	CENS-R4	2015	2015	10817	50698818	21.3358	20.9337	21.7379	0.205142	20.0934	19.7091	20.4778	0.196108	0.00914066
	Census Region 4: West	CENS-R4	2016	2016	10793	51393231	21.0008	20.6046	21.397	0.202146	19.6033	19.2276	19.979	0.191665	0.00912038
	Census Region 4: West	CENS-R4	2017	2017	11042	52227159	21.1423	20.7479	21.5366	0.2012	19.6223	19.2505	19.994	0.189662	0.00933079
	Census Region 4: West	CENS-R4	2018	2018	10900	52867078	20.6177	20.2307	21.0048	0.197482	18.8419	18.4828	19.2009	0.183208	0.0092108
	Census Region 4: West	CENS-R4	2019	2019	11081	53403697	20.7495	20.3632	21.1358	0.197114	18.8136	18.4579	19.1693	0.181477	0.00936375
	Census Region 4: West	CENS-R4	2020	2020	11103	53882971	20.6058	20.2225	20.9891	0.195555	18.4605	18.1118	18.8091	0.177887	0.00938234
	Census Region 4: West	CENS-R4	2021	2021	11501	53940744	21.3215	20.9319	21.7112	0.198816	19.5319	19.169	19.8948	0.185163	0.0356712
	Census Region 4: West	CENS-R4	2022	2022	11573	54153801	21.3706	20.9813	21.76	0.198652	18.9541	18.6038	19.3043	0.178694	0.0358945
	Census Region 4: West	CENS-R4	2023	2023	11640	54595075	21.3206	20.9333	21.7079	0.197616	18.8631	18.5153	19.2109	0.177458	0.0361023
Total					263985
