# Supplementary material for: Trends and Disparities in Colorectal and Anal Carcinoma- Related Mortality Among U.S. Adults (1999-2023) with Predictions Using Machine Learning
Source: Research Square preprint supplement (doi:10.21203/rs.3.rs-8106965/v1), 2025-12-18
Supplement: Supplementary file 9 [file 872752022eebbdf18d7eb6b3.xlsx]

## Sheet: Sheet1
Notes	Year	Year Code	Deaths	Population	Crude Rate	Crude Rate Lower 95% Confidence Interval	Crude Rate Upper 95% Confidence Interval	Crude Rate Standard Error	Age Adjusted Rate	Age Adjusted Rate Lower 95% Confidence Interval	Age Adjusted Rate Upper 95% Confidence Interval	Age Adjusted Rate Standard Error	% of Total Deaths
	1999	1999	6694	19808077	33.7943	32.9847	34.6039	0.413048	44.3222	43.2476	45.3969	0.548302	0.0386599
	2000	2000	6814	20058273	33.971	33.1644	34.7776	0.411536	44.2898	43.224	45.3556	0.543765	0.0393529
	2001	2001	6839	20404945	33.5164	32.722	34.3107	0.405285	43.4031	42.359	44.4473	0.532735	0.0394973
	2002	2002	6807	20695836	32.8907	32.1093	33.672	0.398653	42.3578	41.3342	43.3814	0.522252	0.0393125
	2003	2003	6873	20982115	32.7565	31.982	33.5309	0.395115	41.7892	40.7821	42.7963	0.513817	0.0396937
	2004	2004	6566	21327519	30.7865	30.0418	31.5312	0.379936	39.1531	38.1857	40.1205	0.493564	0.0379207
	2005	2005	6793	21703691	31.2988	30.5545	32.0431	0.379749	39.3802	38.4221	40.3382	0.488812	0.0392317
	2006	2006	6818	22092072	30.8617	30.1292	31.5943	0.373759	38.4916	37.555	39.4282	0.47785	0.039376
	2007	2007	6842	22474128	30.4439	29.7225	31.1653	0.368052	37.1651	36.2603	38.07	0.461652	0.0395146
	2008	2008	6822	22857307	29.846	29.1378	30.5543	0.361352	36.069	35.1892	36.9488	0.448866	0.0393991
	2009	2009	6776	23236715	29.1607	28.4664	29.8551	0.354252	34.7744	33.9217	35.6271	0.435063	0.0391335
	2010	2010	6927	23537629	29.4295	28.7364	30.1225	0.353598	34.5615	33.7217	35.4012	0.428464	0.0400055
	2011	2011	6985	23958352	29.1548	28.471	29.8385	0.34884	33.5995	32.7865	34.4126	0.414829	0.0403405
	2012	2012	6803	24345607	27.9434	27.2794	28.6075	0.338789	31.5983	30.8236	32.373	0.395265	0.0392894
	2013	2013	6821	24743381	27.567	26.9128	28.2212	0.333784	30.7804	30.0269	31.5338	0.38439	0.0393934
	2014	2014	6821	25244585	27.0197	26.3784	27.6609	0.327157	29.4479	28.7271	30.1688	0.367763	0.0393934
	2015	2015	7111	25752287	27.6131	26.9713	28.2549	0.327453	29.875	29.1589	30.5912	0.36537	0.0410682
	2016	2016	7236	26212105	27.6056	26.9695	28.2416	0.324524	29.4063	28.7076	30.105	0.356476	0.0417901
	2017	2017	7205	26762620	26.9219	26.3002	27.5435	0.317167	28.4744	27.7969	29.152	0.345701	0.0416111
	2018	2018	7023	27178229	25.8405	25.2362	26.4449	0.308347	27.0529	26.4017	27.704	0.332236	0.04056
	2019	2019	7041	27592123	25.5182	24.9221	26.1142	0.304111	26.4676	25.8321	27.1032	0.324268	0.0406639
	2020	2020	7221	27969928	25.817	25.2215	26.4125	0.303814	26.2452	25.6233	26.8671	0.317291	0.0417035
	2021	2021	7122	27538737	25.8618	25.2611	26.4624	0.306448	26.5799	25.9416	27.2181	0.325622	0.0411317
	2022	2022	7020	27685911	25.3559	24.7627	25.949	0.302628	25.479	24.866	26.092	0.312745	0.0405426
	2023	2023	7171	28042483	25.5719	24.98	26.1638	0.301977	25.5156	24.9079	26.1233	0.31004	0.0414147
Total			173151
