# Supplementary material for: Trends and Disparities in Colorectal and Anal Carcinoma- Related Mortality Among U.S. Adults (1999-2023) with Predictions Using Machine Learning
Source: Research Square preprint supplement (doi:10.21203/rs.3.rs-8106965/v1), 2025-12-18
Supplement: Supplementary file 10 [file 91867625fe0fef2419b8b599.xlsx]

## Sheet: Sheet1
Year	Value	Type	Sex	Metric_Type	Lower	Upper
1999	39.0881	Actual	Male	AAMR	NA	NA
2000	38.7926	Actual	Male	AAMR	NA	NA
2001	37.5657	Actual	Male	AAMR	NA	NA
2002	36.9934	Actual	Male	AAMR	NA	NA
2003	35.7161	Actual	Male	AAMR	NA	NA
2004	33.623	Actual	Male	AAMR	NA	NA
2005	32.7332	Actual	Male	AAMR	NA	NA
2006	31.9757	Actual	Male	AAMR	NA	NA
2007	31.3112	Actual	Male	AAMR	NA	NA
2008	30.4568	Actual	Male	AAMR	NA	NA
2009	29.5404	Actual	Male	AAMR	NA	NA
2010	29.3488	Actual	Male	AAMR	NA	NA
2011	28.0272	Actual	Male	AAMR	NA	NA
2012	27.3244	Actual	Male	AAMR	NA	NA
2013	26.882	Actual	Male	AAMR	NA	NA
2014	26.1574	Actual	Male	AAMR	NA	NA
2015	25.933	Actual	Male	AAMR	NA	NA
2016	25.4144	Actual	Male	AAMR	NA	NA
2017	24.9667	Actual	Male	AAMR	NA	NA
2018	24.6345	Actual	Male	AAMR	NA	NA
2019	23.8805	Actual	Male	AAMR	NA	NA
2020	23.7694	Actual	Male	AAMR	NA	NA
2021	24.1516	Actual	Male	AAMR	NA	NA
2022	23.5907	Actual	Male	AAMR	NA	NA
2023	23.6829	Actual	Male	AAMR	NA	NA
2024	23.4784	Forecast	Male	AAMR	22.5139	24.4429
2025	23.2739	Forecast	Male	AAMR	21.7188	24.829
2026	23.0693	Forecast	Male	AAMR	20.9259	25.2128
2027	22.8648	Forecast	Male	AAMR	20.1099	25.6197
2028	22.6603	Forecast	Male	AAMR	19.2642	26.0564
2029	22.4558	Forecast	Male	AAMR	18.3868	26.5248
2030	22.2513	Forecast	Male	AAMR	17.4774	27.0251
2031	22.0467	Forecast	Male	AAMR	16.5365	27.557
2032	21.8422	Forecast	Male	AAMR	15.5647	28.1197
2033	21.6377	Forecast	Male	AAMR	14.5629	28.7125
2034	21.4332	Forecast	Male	AAMR	13.532	29.3344
2035	21.2287	Forecast	Male	AAMR	12.4726	29.9847
2036	21.0241	Forecast	Male	AAMR	11.3857	30.6625
2037	20.8196	Forecast	Male	AAMR	10.272	31.3672
2038	20.6151	Forecast	Male	AAMR	9.13209	32.0981
2039	20.4106	Forecast	Male	AAMR	7.9667	32.8544
2040	20.206	Forecast	Male	AAMR	6.77645	33.6356
2041	20.0015	Forecast	Male	AAMR	5.56189	34.4411
2042	19.797	Forecast	Male	AAMR	4.32359	35.2704
2043	19.5925	Forecast	Male	AAMR	3.06204	36.1229
2044	19.388	Forecast	Male	AAMR	1.77774	36.9982
2045	19.1834	Forecast	Male	AAMR	0.471135	37.8957
2046	18.9789	Forecast	Male	AAMR	-0.857344	38.8152
2047	18.7744	Forecast	Male	AAMR	-2.20729	39.7561
2048	18.5699	Forecast	Male	AAMR	-3.57831	40.718
2049	18.3653	Forecast	Male	AAMR	-4.97005	41.7007
2050	18.1608	Forecast	Male	AAMR	-6.38215	42.7038
2051	17.9563	Forecast	Male	AAMR	-7.81428	43.7269
2052	17.7518	Forecast	Male	AAMR	-9.26613	44.7697
2053	17.5473	Forecast	Male	AAMR	-10.7374	45.8319
2054	17.3427	Forecast	Male	AAMR	-12.2278	46.9132
2055	17.1382	Forecast	Male	AAMR	-13.737	48.0134
2056	16.9337	Forecast	Male	AAMR	-15.2648	49.1322
2057	16.7292	Forecast	Male	AAMR	-16.8109	50.2693
2058	16.5246	Forecast	Male	AAMR	-18.3751	51.4244
2059	16.3201	Forecast	Male	AAMR	-19.9572	52.5974
2060	16.1156	Forecast	Male	AAMR	-21.5568	53.788
2061	15.9111	Forecast	Male	AAMR	-23.1739	54.9961
2062	15.7066	Forecast	Male	AAMR	-24.8082	56.2213
2063	15.502	Forecast	Male	AAMR	-26.4594	57.4635
2064	15.2975	Forecast	Male	AAMR	-28.1274	58.7225
2065	15.093	Forecast	Male	AAMR	-29.8121	59.9981
2066	14.8885	Forecast	Male	AAMR	-31.5131	61.2901
2067	14.6839	Forecast	Male	AAMR	-33.2304	62.5983
2068	14.4794	Forecast	Male	AAMR	-34.9638	63.9226
2069	14.2749	Forecast	Male	AAMR	-36.713	65.2628
1999	27.5384	Actual	Female	AAMR	NA	NA
2000	27.3133	Actual	Female	AAMR	NA	NA
2001	26.6574	Actual	Female	AAMR	NA	NA
2002	25.9332	Actual	Female	AAMR	NA	NA
2003	25.2683	Actual	Female	AAMR	NA	NA
2004	23.9584	Actual	Female	AAMR	NA	NA
2005	23.2138	Actual	Female	AAMR	NA	NA
2006	23.0458	Actual	Female	AAMR	NA	NA
2007	22.5243	Actual	Female	AAMR	NA	NA
2008	21.9557	Actual	Female	AAMR	NA	NA
2009	20.9256	Actual	Female	AAMR	NA	NA
2010	20.5783	Actual	Female	AAMR	NA	NA
2011	20.1124	Actual	Female	AAMR	NA	NA
2012	19.4643	Actual	Female	AAMR	NA	NA
2013	19.0665	Actual	Female	AAMR	NA	NA
2014	18.7245	Actual	Female	AAMR	NA	NA
2015	18.6985	Actual	Female	AAMR	NA	NA
2016	18.3022	Actual	Female	AAMR	NA	NA
2017	18.0367	Actual	Female	AAMR	NA	NA
2018	17.3339	Actual	Female	AAMR	NA	NA
2019	17.1212	Actual	Female	AAMR	NA	NA
2020	16.6967	Actual	Female	AAMR	NA	NA
2021	17.5771	Actual	Female	AAMR	NA	NA
2022	16.9973	Actual	Female	AAMR	NA	NA
2023	17.0943	Actual	Female	AAMR	NA	NA
2024	16.935	Forecast	Female	AAMR	16.1173	17.7528
2025	16.7758	Forecast	Female	AAMR	15.4924	18.0592
2026	16.6165	Forecast	Female	AAMR	14.8863	18.3467
2027	16.4573	Forecast	Female	AAMR	14.2739	18.6406
2028	16.298	Forecast	Female	AAMR	13.6473	18.9487
2029	16.1388	Forecast	Female	AAMR	13.0036	19.2739
2030	15.9795	Forecast	Female	AAMR	12.3414	19.6176
2031	15.8202	Forecast	Female	AAMR	11.6605	19.98
2032	15.661	Forecast	Female	AAMR	10.9608	20.3612
2033	15.5017	Forecast	Female	AAMR	10.2425	20.7609
2034	15.3425	Forecast	Female	AAMR	9.50601	21.1789
2035	15.1832	Forecast	Female	AAMR	8.75159	21.6148
2036	15.024	Forecast	Female	AAMR	7.97964	22.0683
2037	14.8647	Forecast	Female	AAMR	7.19054	22.5388
2038	14.7054	Forecast	Female	AAMR	6.38465	23.0262
2039	14.5462	Forecast	Female	AAMR	5.56233	23.53
2040	14.3869	Forecast	Female	AAMR	4.72392	24.0499
2041	14.2277	Forecast	Female	AAMR	3.86977	24.5856
2042	14.0684	Forecast	Female	AAMR	3.00018	25.1366
2043	13.9091	Forecast	Female	AAMR	2.11545	25.7028
2044	13.7499	Forecast	Female	AAMR	1.21587	26.2839
2045	13.5906	Forecast	Female	AAMR	0.301722	26.8795
2046	13.4314	Forecast	Female	AAMR	-0.626745	27.4895
2047	13.2721	Forecast	Female	AAMR	-1.56928	28.1135
2048	13.1129	Forecast	Female	AAMR	-2.52564	28.7514
2049	12.9536	Forecast	Female	AAMR	-3.4956	29.4028
2050	12.7943	Forecast	Female	AAMR	-4.47895	30.0676
2051	12.6351	Forecast	Female	AAMR	-5.47548	30.7457
2052	12.4758	Forecast	Female	AAMR	-6.48499	31.4366
2053	12.3166	Forecast	Female	AAMR	-7.50729	32.1404
2054	12.1573	Forecast	Female	AAMR	-8.5422	32.8568
2055	11.9981	Forecast	Female	AAMR	-9.58955	33.5857
2056	11.8388	Forecast	Female	AAMR	-10.6492	34.3267
2057	11.6795	Forecast	Female	AAMR	-11.7209	35.0799
2058	11.5203	Forecast	Female	AAMR	-12.8045	35.8451
2059	11.361	Forecast	Female	AAMR	-13.9	36.622
2060	11.2018	Forecast	Female	AAMR	-15.0071	37.4106
2061	11.0425	Forecast	Female	AAMR	-16.1257	38.2107
2062	10.8833	Forecast	Female	AAMR	-17.2557	39.0222
2063	10.724	Forecast	Female	AAMR	-18.397	39.845
2064	10.5647	Forecast	Female	AAMR	-19.5494	40.6788
2065	10.4055	Forecast	Female	AAMR	-20.7127	41.5237
2066	10.2462	Forecast	Female	AAMR	-21.887	42.3794
2067	10.087	Forecast	Female	AAMR	-23.072	43.2459
2068	9.9277	Forecast	Female	AAMR	-24.2677	44.1231
2069	9.76845	Forecast	Female	AAMR	-25.4739	45.0108
1999	32.3281	Actual	Both	AAMR	NA	NA
2000	32.0898	Actual	Both	AAMR	NA	NA
2001	31.234	Actual	Both	AAMR	NA	NA
2002	30.6064	Actual	Both	AAMR	NA	NA
2003	29.6905	Actual	Both	AAMR	NA	NA
2004	28.0712	Actual	Both	AAMR	NA	NA
2005	27.2875	Actual	Both	AAMR	NA	NA
2006	26.8931	Actual	Both	AAMR	NA	NA
2007	26.3276	Actual	Both	AAMR	NA	NA
2008	25.6972	Actual	Both	AAMR	NA	NA
2009	24.7168	Actual	Both	AAMR	NA	NA
2010	24.414	Actual	Both	AAMR	NA	NA
2011	23.6113	Actual	Both	AAMR	NA	NA
2012	22.9815	Actual	Both	AAMR	NA	NA
2013	22.5524	Actual	Both	AAMR	NA	NA
2014	22.0683	Actual	Both	AAMR	NA	NA
2015	21.9442	Actual	Both	AAMR	NA	NA
2016	21.4879	Actual	Both	AAMR	NA	NA
2017	21.1933	Actual	Both	AAMR	NA	NA
2018	20.6472	Actual	Both	AAMR	NA	NA
2019	20.2345	Actual	Both	AAMR	NA	NA
2020	19.9525	Actual	Both	AAMR	NA	NA
2021	20.6311	Actual	Both	AAMR	NA	NA
2022	20.0416	Actual	Both	AAMR	NA	NA
2023	20.1499	Actual	Both	AAMR	NA	NA
2024	19.9967	Forecast	Both	AAMR	19.1926	20.8008
2025	19.8435	Forecast	Both	AAMR	18.5525	21.1344
2026	19.6902	Forecast	Both	AAMR	17.9168	21.4637
2027	19.537	Forecast	Both	AAMR	17.264	21.81
2028	19.3838	Forecast	Both	AAMR	16.5881	22.1795
2029	19.2306	Forecast	Both	AAMR	15.8872	22.574
2030	19.0774	Forecast	Both	AAMR	15.161	22.9937
2031	18.9241	Forecast	Both	AAMR	14.4097	23.4385
2032	18.7709	Forecast	Both	AAMR	13.6339	23.9079
2033	18.6177	Forecast	Both	AAMR	12.8341	24.4013
2034	18.4645	Forecast	Both	AAMR	12.0109	24.918
2035	18.3112	Forecast	Both	AAMR	11.1651	25.4574
2036	18.158	Forecast	Both	AAMR	10.2971	26.0189
2037	18.0048	Forecast	Both	AAMR	9.40769	26.6019
2038	17.8516	Forecast	Both	AAMR	8.49727	27.2059
2039	17.6983	Forecast	Both	AAMR	7.5664	27.8303
2040	17.5451	Forecast	Both	AAMR	6.61556	28.4747
2041	17.3919	Forecast	Both	AAMR	5.64521	29.1386
2042	17.2387	Forecast	Both	AAMR	4.65579	29.8216
2043	17.0855	Forecast	Both	AAMR	3.64769	30.5232
2044	16.9322	Forecast	Both	AAMR	2.62131	31.2432
2045	16.779	Forecast	Both	AAMR	1.577	31.981
2046	16.6258	Forecast	Both	AAMR	0.515104	32.7365
2047	16.4726	Forecast	Both	AAMR	-0.564048	33.5092
2048	16.3193	Forecast	Both	AAMR	-1.66015	34.2988
2049	16.1661	Forecast	Both	AAMR	-2.77291	35.1052
2050	16.0129	Forecast	Both	AAMR	-3.90205	35.9278
2051	15.8597	Forecast	Both	AAMR	-5.0473	36.7667
2052	15.7065	Forecast	Both	AAMR	-6.20841	37.6213
2053	15.5532	Forecast	Both	AAMR	-7.38514	38.4916
2054	15.4	Forecast	Both	AAMR	-8.57725	39.3773
2055	15.2468	Forecast	Both	AAMR	-9.78453	40.2781
2056	15.0936	Forecast	Both	AAMR	-11.0068	41.1939
2057	14.9403	Forecast	Both	AAMR	-12.2437	42.1244
2058	14.7871	Forecast	Both	AAMR	-13.4953	43.0695
2059	14.6339	Forecast	Both	AAMR	-14.7612	44.029
2060	14.4807	Forecast	Both	AAMR	-16.0412	45.0026
2061	14.3275	Forecast	Both	AAMR	-17.3353	45.9902
2062	14.1742	Forecast	Both	AAMR	-18.6432	46.9917
2063	14.021	Forecast	Both	AAMR	-19.9648	48.0068
2064	13.8678	Forecast	Both	AAMR	-21.2999	49.0355
2065	13.7146	Forecast	Both	AAMR	-22.6484	50.0775
2066	13.5613	Forecast	Both	AAMR	-24.0101	51.1328
2067	13.4081	Forecast	Both	AAMR	-25.3848	52.2011
2068	13.2549	Forecast	Both	AAMR	-26.7725	53.2823
2069	13.1017	Forecast	Both	AAMR	-28.173	54.3764
1999	28212	Actual	Male	Deaths	NA	NA
2000	28436	Actual	Male	Deaths	NA	NA
2001	28201	Actual	Male	Deaths	NA	NA
2002	28464	Actual	Male	Deaths	NA	NA
2003	27978	Actual	Male	Deaths	NA	NA
2004	26895	Actual	Male	Deaths	NA	NA
2005	26809	Actual	Male	Deaths	NA	NA
2006	26898	Actual	Male	Deaths	NA	NA
2007	27097	Actual	Male	Deaths	NA	NA
2008	27065	Actual	Male	Deaths	NA	NA
2009	26940	Actual	Male	Deaths	NA	NA
2010	27251	Actual	Male	Deaths	NA	NA
2011	26938	Actual	Male	Deaths	NA	NA
2012	26997	Actual	Male	Deaths	NA	NA
2013	27323	Actual	Male	Deaths	NA	NA
2014	27271	Actual	Male	Deaths	NA	NA
2015	27783	Actual	Male	Deaths	NA	NA
2016	27915	Actual	Male	Deaths	NA	NA
2017	28068	Actual	Male	Deaths	NA	NA
2018	28275	Actual	Male	Deaths	NA	NA
2019	28072	Actual	Male	Deaths	NA	NA
2020	28477	Actual	Male	Deaths	NA	NA
2021	28883	Actual	Male	Deaths	NA	NA
2022	29008	Actual	Male	Deaths	NA	NA
2023	29584	Actual	Male	Deaths	NA	NA
2024	29843.3	Forecast	Male	Deaths	29129.5	30557.1
2025	30102.6	Forecast	Male	Deaths	28986.3	31218.9
2026	30361.9	Forecast	Male	Deaths	28861.5	31862.3
2027	30621.2	Forecast	Male	Deaths	28732.7	32509.7
2028	30880.5	Forecast	Male	Deaths	28592.8	33168.3
2029	31139.8	Forecast	Male	Deaths	28439	33840.7
2030	31399.2	Forecast	Male	Deaths	28270.1	34528.2
2031	31658.5	Forecast	Male	Deaths	28085.8	35231.1
2032	31917.8	Forecast	Male	Deaths	27885.9	35949.6
2033	32177.1	Forecast	Male	Deaths	27670.6	36683.5
2034	32436.4	Forecast	Male	Deaths	27440.2	37432.6
2035	32695.7	Forecast	Male	Deaths	27194.8	38196.6
2036	32955	Forecast	Male	Deaths	26934.8	38975.2
2037	33214.3	Forecast	Male	Deaths	26660.5	39768.1
2038	33473.6	Forecast	Male	Deaths	26372.1	40575.1
2039	33732.9	Forecast	Male	Deaths	26070	41395.8
2040	33992.2	Forecast	Male	Deaths	25754.4	42230
2041	34251.5	Forecast	Male	Deaths	25425.7	43077.4
2042	34510.8	Forecast	Male	Deaths	25084	43937.7
2043	34770.1	Forecast	Male	Deaths	24729.6	44810.7
2044	35029.5	Forecast	Male	Deaths	24362.7	45696.2
2045	35288.8	Forecast	Male	Deaths	23983.7	46593.9
2046	35548.1	Forecast	Male	Deaths	23592.6	47503.5
2047	35807.4	Forecast	Male	Deaths	23189.7	48425
2048	36066.7	Forecast	Male	Deaths	22775.2	49358.1
2049	36326	Forecast	Male	Deaths	22349.3	50302.6
2050	36585.3	Forecast	Male	Deaths	21912.2	51258.4
2051	36844.6	Forecast	Male	Deaths	21464	52225.2
2052	37103.9	Forecast	Male	Deaths	21004.9	53202.9
2053	37363.2	Forecast	Male	Deaths	20535	54191.4
2054	37622.5	Forecast	Male	Deaths	20054.6	55190.5
2055	37881.8	Forecast	Male	Deaths	19563.7	56200
2056	38141.1	Forecast	Male	Deaths	19062.5	57219.8
2057	38400.4	Forecast	Male	Deaths	18551.1	58249.8
2058	38659.8	Forecast	Male	Deaths	18029.7	59289.8
2059	38919.1	Forecast	Male	Deaths	17498.4	60339.8
2060	39178.4	Forecast	Male	Deaths	16957.2	61399.5
2061	39437.7	Forecast	Male	Deaths	16406.4	62468.9
2062	39697	Forecast	Male	Deaths	15846.1	63547.9
2063	39956.3	Forecast	Male	Deaths	15276.2	64636.3
2064	40215.6	Forecast	Male	Deaths	14697.1	65734.1
2065	40474.9	Forecast	Male	Deaths	14108.6	66841.2
2066	40734.2	Forecast	Male	Deaths	13511.1	67957.4
2067	40993.5	Forecast	Male	Deaths	12904.4	69082.6
2068	41252.8	Forecast	Male	Deaths	12288.8	70216.8
2069	41512.1	Forecast	Male	Deaths	11664.4	71359.9
1999	28892	Actual	Female	Deaths	NA	NA
2000	28998	Actual	Female	Deaths	NA	NA
2001	28640	Actual	Female	Deaths	NA	NA
2002	28224	Actual	Female	Deaths	NA	NA
2003	27935	Actual	Female	Deaths	NA	NA
2004	26822	Actual	Female	Deaths	NA	NA
2005	26389	Actual	Female	Deaths	NA	NA
2006	26605	Actual	Female	Deaths	NA	NA
2007	26451	Actual	Female	Deaths	NA	NA
2008	26200	Actual	Female	Deaths	NA	NA
2009	25407	Actual	Female	Deaths	NA	NA
2010	25312	Actual	Female	Deaths	NA	NA
2011	25289	Actual	Female	Deaths	NA	NA
2012	24967	Actual	Female	Deaths	NA	NA
2013	24882	Actual	Female	Deaths	NA	NA
2014	24909	Actual	Female	Deaths	NA	NA
2015	25351	Actual	Female	Deaths	NA	NA
2016	25187	Actual	Female	Deaths	NA	NA
2017	25338	Actual	Female	Deaths	NA	NA
2018	24784	Actual	Female	Deaths	NA	NA
2019	24876	Actual	Female	Deaths	NA	NA
2020	24571	Actual	Female	Deaths	NA	NA
2021	25190	Actual	Female	Deaths	NA	NA
2022	25224	Actual	Female	Deaths	NA	NA
2023	25473	Actual	Female	Deaths	NA	NA
2024	25526.9	Forecast	Female	Deaths	24762.6	26291.2
2025	25580.7	Forecast	Female	Deaths	24395.7	26765.7
2026	25634.6	Forecast	Female	Deaths	24053.4	27215.7
2027	25688.4	Forecast	Female	Deaths	23710.7	27666.1
2028	25742.3	Forecast	Female	Deaths	23359.3	28125.2
2029	25796.1	Forecast	Female	Deaths	22996	28596.3
2030	25850	Forecast	Female	Deaths	22619.1	29080.9
2031	25903.8	Forecast	Female	Deaths	22228	29579.6
2032	25957.7	Forecast	Female	Deaths	21822.5	30092.9
2033	26011.5	Forecast	Female	Deaths	21402.5	30620.5
2034	26065.4	Forecast	Female	Deaths	20968.2	31162.6
2035	26119.3	Forecast	Female	Deaths	20519.8	31718.7
2036	26173.1	Forecast	Female	Deaths	20057.4	32288.8
2037	26227	Forecast	Female	Deaths	19581.4	32872.5
2038	26280.8	Forecast	Female	Deaths	19091.9	33469.7
2039	26334.7	Forecast	Female	Deaths	18589.2	34080.1
2040	26388.5	Forecast	Female	Deaths	18073.7	34703.4
2041	26442.4	Forecast	Female	Deaths	17545.4	35339.4
2042	26496.2	Forecast	Female	Deaths	17004.6	35987.8
2043	26550.1	Forecast	Female	Deaths	16451.7	36648.5
2044	26603.9	Forecast	Female	Deaths	15886.7	37321.2
2045	26657.8	Forecast	Female	Deaths	15309.9	38005.7
2046	26711.7	Forecast	Female	Deaths	14721.5	38701.8
2047	26765.5	Forecast	Female	Deaths	14121.7	39409.3
2048	26819.4	Forecast	Female	Deaths	13510.6	40128.1
2049	26873.2	Forecast	Female	Deaths	12888.5	40857.9
2050	26927.1	Forecast	Female	Deaths	12255.5	41598.6
2051	26980.9	Forecast	Female	Deaths	11611.8	42350.1
2052	27034.8	Forecast	Female	Deaths	10957.5	43112.1
2053	27088.6	Forecast	Female	Deaths	10292.8	43884.5
2054	27142.5	Forecast	Female	Deaths	9617.78	44667.2
2055	27196.3	Forecast	Female	Deaths	8932.64	45460
2056	27250.2	Forecast	Female	Deaths	8237.49	46262.9
2057	27304	Forecast	Female	Deaths	7532.47	47075.6
2058	27357.9	Forecast	Female	Deaths	6817.7	47898.1
2059	27411.8	Forecast	Female	Deaths	6093.28	48730.2
2060	27465.6	Forecast	Female	Deaths	5359.35	49571.9
2061	27519.5	Forecast	Female	Deaths	4616.01	50422.9
2062	27573.3	Forecast	Female	Deaths	3863.37	51283.3
2063	27627.2	Forecast	Female	Deaths	3101.53	52152.8
2064	27681	Forecast	Female	Deaths	2330.6	53031.5
2065	27734.9	Forecast	Female	Deaths	1550.67	53919.1
2066	27788.7	Forecast	Female	Deaths	761.834	54815.6
2067	27842.6	Forecast	Female	Deaths	-35.8123	55721
2068	27896.4	Forecast	Female	Deaths	-842.181	56635.1
2069	27950.3	Forecast	Female	Deaths	-1657.19	57557.8
1999	57104	Actual	Both	Deaths	NA	NA
2000	57434	Actual	Both	Deaths	NA	NA
2001	56841	Actual	Both	Deaths	NA	NA
2002	56688	Actual	Both	Deaths	NA	NA
2003	55913	Actual	Both	Deaths	NA	NA
2004	53717	Actual	Both	Deaths	NA	NA
2005	53198	Actual	Both	Deaths	NA	NA
2006	53503	Actual	Both	Deaths	NA	NA
2007	53548	Actual	Both	Deaths	NA	NA
2008	53265	Actual	Both	Deaths	NA	NA
2009	52347	Actual	Both	Deaths	NA	NA
2010	52563	Actual	Both	Deaths	NA	NA
2011	52227	Actual	Both	Deaths	NA	NA
2012	51964	Actual	Both	Deaths	NA	NA
2013	52205	Actual	Both	Deaths	NA	NA
2014	52180	Actual	Both	Deaths	NA	NA
2015	53134	Actual	Both	Deaths	NA	NA
2016	53102	Actual	Both	Deaths	NA	NA
2017	53406	Actual	Both	Deaths	NA	NA
2018	53059	Actual	Both	Deaths	NA	NA
2019	52948	Actual	Both	Deaths	NA	NA
2020	53048	Actual	Both	Deaths	NA	NA
2021	54073	Actual	Both	Deaths	NA	NA
2022	54232	Actual	Both	Deaths	NA	NA
2023	55057	Actual	Both	Deaths	NA	NA
2024	55426.8	Forecast	Both	Deaths	54122.1	56731.6
2025	55796.6	Forecast	Both	Deaths	53723.7	57869.6
2026	56166.5	Forecast	Both	Deaths	53343.1	58989.9
2027	56536.3	Forecast	Both	Deaths	52942.8	60129.8
2028	56906.1	Forecast	Both	Deaths	52511.9	61300.4
2029	57275.9	Forecast	Both	Deaths	52046.4	62505.4
2030	57645.8	Forecast	Both	Deaths	51545.3	63746.2
2031	58015.6	Forecast	Both	Deaths	51008.5	65022.7
2032	58385.4	Forecast	Both	Deaths	50436.4	66334.5
2033	58755.2	Forecast	Both	Deaths	49829.6	67680.9
2034	59125.1	Forecast	Both	Deaths	49189	69061.1
2035	59494.9	Forecast	Both	Deaths	48515.4	70474.4
2036	59864.7	Forecast	Both	Deaths	47809.5	71919.9
2037	60234.5	Forecast	Both	Deaths	47072.2	73396.9
2038	60604.4	Forecast	Both	Deaths	46304.2	74904.5
2039	60974.2	Forecast	Both	Deaths	45506.2	76442.1
2040	61344	Forecast	Both	Deaths	44679	78009.1
2041	61713.8	Forecast	Both	Deaths	43823.1	79604.6
2042	62083.7	Forecast	Both	Deaths	42939.1	81228.2
2043	62453.5	Forecast	Both	Deaths	42027.7	82879.3
2044	62823.3	Forecast	Both	Deaths	41089.3	84557.3
2045	63193.1	Forecast	Both	Deaths	40124.6	86261.7
2046	63563	Forecast	Both	Deaths	39133.9	87992
2047	63932.8	Forecast	Both	Deaths	38117.8	89747.7
2048	64302.6	Forecast	Both	Deaths	37076.7	91528.5
2049	64672.4	Forecast	Both	Deaths	36011.1	93333.8
2050	65042.3	Forecast	Both	Deaths	34921.2	95163.3
2051	65412.1	Forecast	Both	Deaths	33807.6	97016.5
2052	65781.9	Forecast	Both	Deaths	32670.6	98893.2
2053	66151.7	Forecast	Both	Deaths	31510.5	100793
2054	66521.6	Forecast	Both	Deaths	30327.6	102715
2055	66891.4	Forecast	Both	Deaths	29122.4	104660
2056	67261.2	Forecast	Both	Deaths	27895	106627
2057	67631	Forecast	Both	Deaths	26645.9	108616
2058	68000.9	Forecast	Both	Deaths	25375.2	110626
2059	68370.7	Forecast	Both	Deaths	24083.3	112658
2060	68740.5	Forecast	Both	Deaths	22770.4	114711
2061	69110.3	Forecast	Both	Deaths	21436.8	116784
2062	69480.1	Forecast	Both	Deaths	20082.8	118878
2063	69850	Forecast	Both	Deaths	18708.5	120991
2064	70219.8	Forecast	Both	Deaths	17314.2	123125
2065	70589.6	Forecast	Both	Deaths	15900.1	125279
2066	70959.4	Forecast	Both	Deaths	14466.4	127452
2067	71329.3	Forecast	Both	Deaths	13013.4	129645
2068	71699.1	Forecast	Both	Deaths	11541.3	131857
2069	72068.9	Forecast	Both	Deaths	10050.2	134088
