# Supplementary material for: Trends and Disparities in Colorectal and Anal Carcinoma- Related Mortality Among U.S. Adults (1999-2023) with Predictions Using Machine Learning
Source: Research Square preprint supplement (doi:10.21203/rs.3.rs-8106965/v1), 2025-12-18
Supplement: Supplementary file 11 [file 934d3437709ec51040b01811.xlsx]

## Sheet: Sheet1
Notes	Ten-Year Age Groups	Ten-Year Age Groups Code	Year	Year Code	Deaths	Population	Crude Rate	Crude Rate Lower 95% Confidence Interval	Crude Rate Upper 95% Confidence Interval	Crude Rate Standard Error	% of Total Deaths
	25-34 years	25-34	1999	1999	283	40178406	0.704358	0.622294	0.786423	0.0418698	0.000210135
	25-34 years	25-34	2000	2000	272	39891724	0.681846	0.600813	0.762878	0.041343	0.000201967
	25-34 years	25-34	2001	2001	299	39471522	0.757508	0.671645	0.843372	0.0438078	0.000222015
	25-34 years	25-34	2002	2002	290	39349646	0.736982	0.652159	0.821806	0.0432771	0.000215332
	25-34 years	25-34	2003	2003	291	39243795	0.741518	0.65632	0.826717	0.0434686	0.000216075
	25-34 years	25-34	2004	2004	279	39266556	0.710528	0.627153	0.793903	0.0425382	0.000207164
	25-34 years	25-34	2005	2005	305	39258647	0.776899	0.689708	0.86409	0.0444851	0.00022647
	25-34 years	25-34	2006	2006	323	39395179	0.819897	0.730481	0.909313	0.0456203	0.000239836
	25-34 years	25-34	2007	2007	275	39713463	0.69246	0.610617	0.774304	0.0417569	0.000204194
	25-34 years	25-34	2008	2008	314	40207473	0.780949	0.694569	0.86733	0.0440715	0.000233153
	25-34 years	25-34	2009	2009	294	40723342	0.721945	0.63942	0.80447	0.0421047	0.000218302
	25-34 years	25-34	2010	2010	312	41063948	0.759791	0.675482	0.844099	0.0430147	0.000231668
	25-34 years	25-34	2011	2011	302	41790498	0.722652	0.641148	0.804157	0.041584	0.000224243
	25-34 years	25-34	2012	2012	342	42309321	0.808333	0.722662	0.894003	0.0437096	0.000253944
	25-34 years	25-34	2013	2013	362	42844587	0.844914	0.757875	0.931953	0.0444077	0.000268794
	25-34 years	25-34	2014	2014	322	43516504	0.739949	0.659127	0.820771	0.0412358	0.000239093
	25-34 years	25-34	2015	2015	368	44137202	0.833764	0.748576	0.918951	0.0434629	0.000273249
	25-34 years	25-34	2016	2016	374	44677243	0.837115	0.752274	0.921956	0.0432862	0.000277704
	25-34 years	25-34	2017	2017	342	45342672	0.754256	0.674317	0.834196	0.0407855	0.000253944
	25-34 years	25-34	2018	2018	372	45697774	0.814044	0.73132	0.896768	0.0422062	0.000276219
	25-34 years	25-34	2019	2019	324	45940321	0.705263	0.628468	0.782058	0.0391813	0.000240578
	25-34 years	25-34	2020	2020	408	46069646	0.885616	0.79968	0.971551	0.0438445	0.00030295
	25-34 years	25-34	2021	2021	356	45495105	0.782502	0.701216	0.863788	0.0414725	0.000264339
	25-34 years	25-34	2022	2022	349	45501300	0.767011	0.686539	0.847483	0.0410572	0.000259141
	25-34 years	25-34	2023	2023	382	45542516	0.838777	0.754662	0.922891	0.0429155	0.000283645
Total					8140						0.00604415
	35-44 years	35-44	1999	1999	1333	45076677	2.95718	2.79843	3.11594	0.0809959	0.000989786
	35-44 years	35-44	2000	2000	1369	45148527	3.03221	2.87159	3.19284	0.0819517	0.00101652
	35-44 years	35-44	2001	2001	1433	45051752	3.18079	3.0161	3.34548	0.0840256	0.00106404
	35-44 years	35-44	2002	2002	1425	44640649	3.19216	3.02642	3.3579	0.0845623	0.0010581
	35-44 years	35-44	2003	2003	1315	44154206	2.9782	2.81723	3.13917	0.0821279	0.00097642
	35-44 years	35-44	2004	2004	1326	43800275	3.02738	2.86443	3.19033	0.0831371	0.000984588
	35-44 years	35-44	2005	2005	1297	43505538	2.98123	2.81898	3.14348	0.08278	0.000963055
	35-44 years	35-44	2006	2006	1330	43243801	3.07559	2.91029	3.24088	0.0843339	0.000987558
	35-44 years	35-44	2007	2007	1302	42796230	3.04232	2.87707	3.20758	0.0843141	0.000966768
	35-44 years	35-44	2008	2008	1419	42192486	3.36316	3.18817	3.53815	0.0892804	0.00105364
	35-44 years	35-44	2009	2009	1362	41487811	3.28289	3.10854	3.45724	0.0889545	0.00101132
	35-44 years	35-44	2010	2010	1345	41070606	3.27485	3.09983	3.44987	0.0892956	0.000998696
	35-44 years	35-44	2011	2011	1347	40627954	3.31545	3.13839	3.49251	0.0903356	0.00100018
	35-44 years	35-44	2012	2012	1325	40516420	3.27028	3.09419	3.44637	0.0898415	0.000983846
	35-44 years	35-44	2013	2013	1381	40452690	3.41386	3.23381	3.59392	0.0918649	0.00102543
	35-44 years	35-44	2014	2014	1408	40513133	3.47542	3.29388	3.65695	0.0926202	0.00104548
	35-44 years	35-44	2015	2015	1407	40589783	3.46639	3.28526	3.64752	0.0924124	0.00104473
	35-44 years	35-44	2016	2016	1427	40470156	3.52606	3.3431	3.70901	0.093342	0.00105958
	35-44 years	35-44	2017	2017	1453	40875370	3.55471	3.37193	3.73749	0.0932548	0.00107889
	35-44 years	35-44	2018	2018	1451	41277888	3.5152	3.33433	3.69607	0.0922818	0.0010774
	35-44 years	35-44	2019	2019	1428	41659144	3.42782	3.25003	3.60561	0.0907097	0.00106033
	35-44 years	35-44	2020	2020	1523	42136192	3.61447	3.43294	3.796	0.0926178	0.00113087
	35-44 years	35-44	2021	2021	1672	43403854	3.85219	3.66754	4.03684	0.0942084	0.0012415
	35-44 years	35-44	2022	2022	1647	43695365	3.76928	3.58724	3.95132	0.0928777	0.00122294
	35-44 years	35-44	2023	2023	1683	44390693	3.79134	3.6102	3.97247	0.0924166	0.00124967
Total					35408						0.0262913
	45-54 years	45-54	1999	1999	4057	36577819	11.0914	10.7501	11.4327	0.174134	0.00301242
	45-54 years	45-54	2000	2000	4237	37677952	11.2453	10.9067	11.5839	0.17276	0.00314608
	45-54 years	45-54	2001	2001	4548	39386268	11.5472	11.2116	11.8828	0.171224	0.003377
	45-54 years	45-54	2002	2002	4573	39992194	11.4347	11.1033	11.7662	0.169093	0.00339557
	45-54 years	45-54	2003	2003	4442	40819954	10.8819	10.5619	11.2019	0.163274	0.0032983
	45-54 years	45-54	2004	2004	4273	41629930	10.2642	9.95649	10.572	0.157022	0.00317281
	45-54 years	45-54	2005	2005	4343	42495904	10.2198	9.91586	10.5238	0.155077	0.00322479
	45-54 years	45-54	2006	2006	4499	43286159	10.3936	10.0899	10.6973	0.154956	0.00334062
	45-54 years	45-54	2007	2007	4793	43939939	10.9081	10.5993	11.2169	0.157559	0.00355892
	45-54 years	45-54	2008	2008	4802	44460447	10.8006	10.4951	11.1061	0.155861	0.00356561
	45-54 years	45-54	2009	2009	4884	44867088	10.8855	10.5802	11.1908	0.155761	0.00362649
	45-54 years	45-54	2010	2010	5052	45006716	11.225	10.9155	11.5345	0.157926	0.00375124
	45-54 years	45-54	2011	2011	4990	44718203	11.1588	10.8492	11.4684	0.157967	0.0037052
	45-54 years	45-54	2012	2012	5033	44268738	11.3692	11.0551	11.6833	0.160257	0.00373713
	45-54 years	45-54	2013	2013	5052	43767532	11.5428	11.2245	11.8611	0.162398	0.00375124
	45-54 years	45-54	2014	2014	4983	43458851	11.466	11.1477	11.7844	0.16243	0.0037
	45-54 years	45-54	2015	2015	4972	43188161	11.5124	11.1924	11.8324	0.163268	0.00369183
	45-54 years	45-54	2016	2016	4928	42786679	11.5176	11.196	11.8392	0.164069	0.00365916
	45-54 years	45-54	2017	2017	4976	42374952	11.7428	11.4165	12.0691	0.166468	0.0036948
	45-54 years	45-54	2018	2018	4971	41631699	11.9404	11.6085	12.2724	0.169355	0.00369109
	45-54 years	45-54	2019	2019	4887	40874902	11.956	11.6208	12.2912	0.171027	0.00362872
	45-54 years	45-54	2020	2020	4800	40366133	11.8912	11.5548	12.2276	0.171634	0.00356412
	45-54 years	45-54	2021	2021	4846	40688436	11.91	11.5747	12.2454	0.171088	0.00359828
	45-54 years	45-54	2022	2022	5072	40431645	12.5446	12.1994	12.8899	0.176144	0.00376609
	45-54 years	45-54	2023	2023	5053	40493781	12.4785	12.1344	12.8225	0.175544	0.00375198
Total					119066						0.0884095
	55-64 years	55-64	1999	1999	7967	23778026	33.5057	32.77	34.2415	0.37538	0.0059157
	55-64 years	55-64	2000	2000	7940	24274684	32.709	31.9895	33.4284	0.367077	0.00589565
	55-64 years	55-64	2001	2001	7984	25105295	31.8021	31.1045	32.4996	0.355914	0.00592832
	55-64 years	55-64	2002	2002	8421	26703332	31.5354	30.8618	32.2089	0.34365	0.0062528
	55-64 years	55-64	2003	2003	8304	28008945	29.6477	29.01	30.2854	0.325347	0.00616593
	55-64 years	55-64	2004	2004	8208	29305304	28.0086	27.4026	28.6145	0.309152	0.00609465
	55-64 years	55-64	2005	2005	8153	30641497	26.6077	26.0301	27.1853	0.294679	0.00605381
	55-64 years	55-64	2006	2006	8626	31930113	27.0153	26.4451	27.5854	0.290874	0.00640502
	55-64 years	55-64	2007	2007	9058	33128434	27.3421	26.779	27.9052	0.287287	0.00672579
	55-64 years	55-64	2008	2008	9076	34157063	26.5714	26.0247	27.118	0.278912	0.00673916
	55-64 years	55-64	2009	2009	9278	35405600	26.2049	25.6717	26.7381	0.272054	0.00688915
	55-64 years	55-64	2010	2010	9453	36482729	25.9109	25.3886	26.4332	0.2665	0.00701909
	55-64 years	55-64	2011	2011	9861	38062140	25.9076	25.3963	26.419	0.260896	0.00732204
	55-64 years	55-64	2012	2012	9594	38586202	24.8638	24.3663	25.3613	0.253845	0.00712378
	55-64 years	55-64	2013	2013	9676	39316431	24.6106	24.1202	25.101	0.250192	0.00718467
	55-64 years	55-64	2014	2014	9899	40077581	24.6996	24.213	25.1862	0.248253	0.00735025
	55-64 years	55-64	2015	2015	10225	40877819	25.0136	24.5287	25.4984	0.247368	0.00759232
	55-64 years	55-64	2016	2016	10470	41463144	25.2513	24.7677	25.735	0.246781	0.00777424
	55-64 years	55-64	2017	2017	10398	41995658	24.7597	24.2838	25.2356	0.242812	0.00772077
	55-64 years	55-64	2018	2018	10256	42272636	24.2616	23.792	24.7311	0.239568	0.00761534
	55-64 years	55-64	2019	2019	10351	42448537	24.3848	23.9151	24.8546	0.239678	0.00768588
	55-64 years	55-64	2020	2020	10544	42403677	24.8658	24.3911	25.3404	0.242158	0.00782918
	55-64 years	55-64	2021	2021	10478	42803064	24.4796	24.0108	24.9483	0.239147	0.00778018
	55-64 years	55-64	2022	2022	10491	42085437	24.9279	24.4508	25.4049	0.243375	0.00778983
	55-64 years	55-64	2023	2023	10518	41854411	25.13	24.6497	25.6102	0.245033	0.00780988
Total					235229						0.174663
	65-74 years	65-74	1999	1999	14249	18418909	77.3607	76.0905	78.631	0.64808	0.0105802
	65-74 years	65-74	2000	2000	14101	18390986	76.6734	75.4079	77.939	0.645684	0.0104703
	65-74 years	65-74	2001	2001	13791	18384179	75.0156	73.7636	76.2676	0.638783	0.0102402
	65-74 years	65-74	2002	2002	13392	18388535	72.828	71.5945	74.0615	0.629326	0.00994389
	65-74 years	65-74	2003	2003	12934	18500915	69.9101	68.7052	71.1149	0.614714	0.00960382
	65-74 years	65-74	2004	2004	11954	18667533	64.0363	62.8884	65.1843	0.585693	0.00887614
	65-74 years	65-74	2005	2005	11792	18881697	62.452	61.3248	63.5792	0.575112	0.00875585
	65-74 years	65-74	2006	2006	11709	19203027	60.9748	59.8703	62.0792	0.563495	0.00869423
	65-74 years	65-74	2007	2007	11634	19698727	59.0597	57.9864	60.1329	0.547553	0.00863854
	65-74 years	65-74	2008	2008	11770	20505679	57.3987	56.3618	58.4357	0.529071	0.00873952
	65-74 years	65-74	2009	2009	11545	21233099	54.3727	53.3808	55.3645	0.506039	0.00857245
	65-74 years	65-74	2010	2010	11459	21713429	52.7738	51.8075	53.7401	0.492998	0.00850859
	65-74 years	65-74	2011	2011	11462	22481738	50.9836	50.0502	51.917	0.476212	0.00851082
	65-74 years	65-74	2012	2012	11822	23985392	49.2883	48.3998	50.1768	0.453314	0.00877813
	65-74 years	65-74	2013	2013	12014	25216766	47.6429	46.791	48.4948	0.434665	0.0089207
	65-74 years	65-74	2014	2014	11953	26398290	45.2794	44.4677	46.0912	0.414155	0.0088754
	65-74 years	65-74	2015	2015	12586	27550517	45.6834	44.8852	46.4815	0.407206	0.00934542
	65-74 years	65-74	2016	2016	12760	28630330	44.5681	43.7948	45.3414	0.394547	0.00947462
	65-74 years	65-74	2017	2017	13011	29683446	43.8325	43.0793	44.5857	0.384274	0.00966099
	65-74 years	65-74	2018	2018	12988	30492316	42.5943	41.8618	43.3269	0.37375	0.00964391
	65-74 years	65-74	2019	2019	13050	31483433	41.4504	40.7392	42.1616	0.362847	0.00968995
	65-74 years	65-74	2020	2020	13337	32549398	40.9746	40.2792	41.6701	0.354802	0.00990306
	65-74 years	65-74	2021	2021	14008	33666122	41.6086	40.9195	42.2976	0.351556	0.0104013
	65-74 years	65-74	2022	2022	13981	33788439	41.3781	40.6922	42.064	0.349946	0.0103812
	65-74 years	65-74	2023	2023	14302	34685284	41.2336	40.5578	41.9094	0.344789	0.0106196
Total					317604						0.235829
	75-84 years	75-84	1999	1999	17929	12224914	146.66	144.513	148.806	1.0953	0.0133127
	75-84 years	75-84	2000	2000	18053	12361180	146.046	143.915	148.176	1.08696	0.0134048
	75-84 years	75-84	2001	2001	17527	12593618	139.174	137.113	141.234	1.05124	0.0130142
	75-84 years	75-84	2002	2002	17498	12764864	137.079	135.048	139.111	1.03628	0.0129927
	75-84 years	75-84	2003	2003	17331	12896438	134.386	132.385	136.387	1.0208	0.0128687
	75-84 years	75-84	2004	2004	16714	12989903	128.669	126.718	130.62	0.995255	0.0124106
	75-84 years	75-84	2005	2005	16254	13074802	124.315	122.404	126.227	0.975091	0.012069
	75-84 years	75-84	2006	2006	16024	13095151	122.366	120.471	124.261	0.966663	0.0118982
	75-84 years	75-84	2007	2007	15417	13087439	117.8	115.94	119.659	0.948736	0.0114475
	75-84 years	75-84	2008	2008	14936	13076102	114.224	112.392	116.056	0.934628	0.0110904
	75-84 years	75-84	2009	2009	14152	13022775	108.671	106.881	110.462	0.913493	0.0105082
	75-84 years	75-84	2010	2010	13846	13061122	106.009	104.243	107.775	0.900911	0.010281
	75-84 years	75-84	2011	2011	13395	13175230	101.668	99.9463	103.39	0.878442	0.00994612
	75-84 years	75-84	2012	2012	13020	13272634	98.0966	96.4116	99.7816	0.859703	0.00966768
	75-84 years	75-84	2013	2013	12921	13446519	96.0918	94.4349	97.7487	0.845353	0.00959417
	75-84 years	75-84	2014	2014	12678	13682690	92.6572	91.0443	94.2701	0.822913	0.00941373
	75-84 years	75-84	2015	2015	12572	13923174	90.2955	88.7171	91.8739	0.805312	0.00933502
	75-84 years	75-84	2016	2016	12372	14233534	86.9215	85.3898	88.4532	0.781461	0.00918652
	75-84 years	75-84	2017	2017	12447	14706551	84.6358	83.1489	86.1226	0.758615	0.00924221
	75-84 years	75-84	2018	2018	12513	15394374	81.2829	79.8587	82.7072	0.726639	0.00929122
	75-84 years	75-84	2019	2019	12444	15969872	77.9217	76.5526	79.2908	0.69852	0.00923998
	75-84 years	75-84	2020	2020	12241	16451547	74.4064	73.0882	75.7245	0.672515	0.00908925
	75-84 years	75-84	2021	2021	12631	16206075	77.9399	76.5807	79.2992	0.693491	0.00937883
	75-84 years	75-84	2022	2022	12751	17520545	72.7774	71.5142	74.0406	0.644502	0.00946794
	75-84 years	75-84	2023	2023	13126	18368097	71.4609	70.2383	72.6834	0.623738	0.00974638
Total					360792						0.267897
	85+ years	85+	1999	1999	11286	4154018	271.689	266.676	276.701	2.55742	0.00838014
	85+ years	85+	2000	2000	11462	4239587	270.357	265.407	275.306	2.52526	0.00851082
	85+ years	85+	2001	2001	11259	4312494	261.079	256.256	265.901	2.46049	0.00836009
	85+ years	85+	2002	2002	11089	4368808	253.822	249.098	258.546	2.41037	0.00823386
	85+ years	85+	2003	2003	11296	4466176	252.923	248.259	257.588	2.37972	0.00838756
	85+ years	85+	2004	2004	10963	4545883	241.163	236.649	245.678	2.30328	0.0081403
	85+ years	85+	2005	2005	11054	4693299	235.527	231.137	239.918	2.24017	0.00820787
	85+ years	85+	2006	2006	10992	4865929	225.897	221.674	230.12	2.15463	0.00816183
	85+ years	85+	2007	2007	11069	5039545	219.643	215.551	223.735	2.08767	0.00821901
	85+ years	85+	2008	2008	10948	5195840	210.707	206.76	214.654	2.01378	0.00812916
	85+ years	85+	2009	2009	10832	5367301	201.815	198.014	205.615	1.93909	0.00804303
	85+ years	85+	2010	2010	11096	5493433	201.987	198.228	205.745	1.91752	0.00823906
	85+ years	85+	2011	2011	10870	5737173	189.466	185.904	193.028	1.81726	0.00807125
	85+ years	85+	2012	2012	10828	5887330	183.92	180.456	187.385	1.76749	0.00804006
	85+ years	85+	2013	2013	10799	6040789	178.768	175.396	182.14	1.72028	0.00801853
	85+ years	85+	2014	2014	10937	6162231	177.484	174.158	180.811	1.69711	0.008121
	85+ years	85+	2015	2015	11004	6287161	175.023	171.753	178.294	1.66848	0.00817075
	85+ years	85+	2016	2016	10771	6380331	168.816	165.628	172.004	1.62662	0.00799774
	85+ years	85+	2017	2017	10779	6468682	166.634	163.488	169.779	1.60499	0.00800368
	85+ years	85+	2018	2018	10508	6544503	160.562	157.492	163.632	1.56633	0.00780245
	85+ years	85+	2019	2019	10464	6604958	158.426	155.391	161.462	1.54874	0.00776978
	85+ years	85+	2020	2020	10195	6658420	153.114	150.142	156.087	1.51643	0.00757004
	85+ years	85+	2021	2021	10082	5975756	168.715	165.422	172.008	1.68028	0.00748614
	85+ years	85+	2022	2022	9941	6485868	153.272	150.259	156.285	1.53726	0.00738144
	85+ years	85+	2023	2023	9993	6194980	161.308	158.145	164.471	1.61365	0.00742005
Total					270517						0.200866
Total					1346756
								1346756
