# Supplementary material for: Trends and Disparities in Colorectal and Anal Carcinoma- Related Mortality Among U.S. Adults (1999-2023) with Predictions Using Machine Learning
Source: Research Square preprint supplement (doi:10.21203/rs.3.rs-8106965/v1), 2025-12-18
Supplement: Supplementary file 12 [file 957d4f0467750a0e25e9da6a.xlsx]

## Sheet: Sheet1
Notes	Year	Year Code	Deaths	Population	Crude Rate	Crude Rate Lower 95% Confidence Interval	Crude Rate Upper 95% Confidence Interval	Crude Rate Standard Error	Age Adjusted Rate	Age Adjusted Rate Lower 95% Confidence Interval	Age Adjusted Rate Upper 95% Confidence Interval	Age Adjusted Rate Standard Error	% of Total Deaths
	1999	1999	2024	17503631	11.5633	11.0595	12.0671	0.257026	22.0689	21.0561	23.0817	0.516729	0.0239391
	2000	2000	2109	18219679	11.5754	11.0814	12.0694	0.252056	21.7283	20.7494	22.7072	0.499447	0.0249444
	2001	2001	2244	19290018	11.633	11.1516	12.1143	0.245572	21.978	21.0201	22.9358	0.48872	0.0265411
	2002	2002	2361	20159630	11.7115	11.2391	12.1839	0.241027	21.7752	20.8488	22.7016	0.472666	0.027925
	2003	2003	2461	21011656	11.7125	11.2498	12.1753	0.2361	21.2834	20.3969	22.1699	0.452299	0.0291077
	2004	2004	2429	21877214	11.1029	10.6613	11.5444	0.22528	20.2153	19.3675	21.0632	0.432578	0.0287292
	2005	2005	2535	22804023	11.1165	10.6837	11.5492	0.220789	20.2136	19.3847	21.0424	0.42288	0.029983
	2006	2006	2747	23743864	11.5693	11.1367	12.002	0.220738	20.6249	19.8126	21.4372	0.414437	0.0324904
	2007	2007	2801	24673919	11.3521	10.9317	11.7725	0.214496	19.72	18.9504	20.4896	0.392651	0.0331291
	2008	2008	2939	25602850	11.4792	11.0642	11.8942	0.211744	19.5637	18.8187	20.3086	0.380064	0.0347613
	2009	2009	3094	26504021	11.6737	11.2624	12.085	0.209869	19.6329	18.9057	20.3601	0.371005	0.0365946
	2010	2010	3173	27192663	11.6686	11.2626	12.0746	0.207149	19.0637	18.3655	19.762	0.356243	0.037529
	2011	2011	3248	28255675	11.495	11.0997	11.8904	0.201698	18.4502	17.7853	19.115	0.339212	0.038416
	2012	2012	3334	28988437	11.5011	11.1107	11.8915	0.199186	18.0177	17.3781	18.6572	0.326297	0.0394332
	2013	2013	3567	29784174	11.9762	11.5831	12.3692	0.200524	18.0524	17.433	18.6717	0.315998	0.0421891
	2014	2014	3585	30809714	11.6359	11.255	12.0168	0.194338	17.1786	16.5914	17.7657	0.299567	0.0424019
	2015	2015	3778	31761872	11.8948	11.5155	12.2741	0.19352	16.859	16.2975	17.4205	0.286476	0.0446847
	2016	2016	3900	32438262	12.0228	11.6455	12.4002	0.19252	16.6974	16.1514	17.2434	0.278571	0.0461276
	2017	2017	4139	33594503	12.3205	11.9451	12.6958	0.191505	16.8447	16.3106	17.3788	0.272494	0.0489544
	2018	2018	4308	34350362	12.5414	12.1668	12.9159	0.191076	16.828	16.3059	17.3502	0.266396	0.0509533
	2019	2019	4361	35025850	12.4508	12.0813	12.8203	0.18854	16.239	15.7394	16.7386	0.254906	0.0515802
	2020	2020	4566	35758193	12.7691	12.3987	13.1395	0.18897	16.3189	15.829	16.8088	0.249952	0.0540048
	2021	2021	4799	36687942	13.0806	12.7105	13.4507	0.188822	16.7541	16.2604	17.2477	0.251851	0.0567607
	2022	2022	4948	37391420	13.233	12.8643	13.6017	0.188123	16.5824	16.1037	17.0611	0.244235	0.058523
	2023	2023	5098	38599156	13.2075	12.845	13.5701	0.184979	16.3812	15.9145	16.8479	0.238116	0.0602971
Total			84548
