# Supplementary material for: Trends and Disparities in Colorectal and Anal Carcinoma- Related Mortality Among U.S. Adults (1999-2023) with Predictions Using Machine Learning
Source: Research Square preprint supplement (doi:10.21203/rs.3.rs-8106965/v1), 2025-12-18
Supplement: Supplementary file 13 [file d336f531484c6d36a66ab3db.xlsx]

## Sheet: Sheet1
Notes	Year	Year Code	Deaths	Population	Crude Rate	Crude Rate Lower 95% Confidence Interval	Crude Rate Upper 95% Confidence Interval	Crude Rate Standard Error	Age Adjusted Rate	Age Adjusted Rate Lower 95% Confidence Interval	Age Adjusted Rate Upper 95% Confidence Interval	Age Adjusted Rate Standard Error	% of Total Deaths
	1999	1999	991	8161171	12.1429	11.3868	12.8989	0.385731	19.2577	17.9868	20.5287	0.648453	0.0222282
	2000	2000	1104	8503717	12.9826	12.2167	13.7484	0.390729	20.2949	19.0343	21.5556	0.643193	0.0247628
	2001	2001	1212	8958486	13.5291	12.7674	14.2908	0.388612	20.6907	19.4666	21.9148	0.624553	0.0271852
	2002	2002	1278	9325719	13.704	12.9527	14.4554	0.383339	20.6393	19.4511	21.8274	0.606217	0.0286656
	2003	2003	1283	9680790	13.2531	12.5278	13.9783	0.370001	19.6555	18.5254	20.7855	0.576565	0.0287778
	2004	2004	1277	10044050	12.714	12.0167	13.4113	0.355784	18.6893	17.6152	19.7634	0.548009	0.0286432
	2005	2005	1345	10429218	12.8965	12.2072	13.5857	0.351649	18.5869	17.5493	19.6245	0.529377	0.0301684
	2006	2006	1377	10820401	12.726	12.0538	13.3981	0.342944	18.0229	17.0298	19.016	0.506667	0.0308862
	2007	2007	1452	11195465	12.9695	12.3024	13.6366	0.340362	18.072	17.1032	19.0407	0.494276	0.0325685
	2008	2008	1623	11562480	14.0368	13.3539	14.7197	0.348424	19.2712	18.2957	20.2466	0.497676	0.036404
	2009	2009	1564	11914417	13.127	12.4764	13.7775	0.331929	17.5068	16.6045	18.4091	0.460355	0.0350806
	2010	2010	1720	12174186	14.1283	13.4606	14.796	0.340662	18.4221	17.5182	19.3261	0.461209	0.0385797
	2011	2011	1788	12589184	14.2027	13.5443	14.861	0.335882	17.8542	16.9981	18.7102	0.43677	0.040105
	2012	2012	1841	13067325	14.0886	13.445	14.7321	0.328352	17.5024	16.6781	18.3267	0.420553	0.0412938
	2013	2013	1870	13512525	13.839	13.2118	14.4663	0.320025	16.3996	15.6352	17.164	0.390012	0.0419442
	2014	2014	1886	14112716	13.3638	12.7607	13.967	0.307723	15.7242	14.996	16.4523	0.371505	0.0423031
	2015	2015	2040	14691784	13.8853	13.2828	14.4879	0.307426	16.1252	15.4093	16.8412	0.365264	0.0457574
	2016	2016	2028	15011870	13.5093	12.9213	14.0973	0.299985	15.1881	14.513	15.8633	0.344452	0.0454882
	2017	2017	2155	15633986	13.7841	13.2021	14.3661	0.29693	15.3548	14.6946	16.015	0.336836	0.0483368
	2018	2018	2134	15981223	13.3532	12.7866	13.9197	0.289059	14.5254	13.8987	15.1522	0.319766	0.0478658
	2019	2019	2241	16283516	13.7624	13.1926	14.3322	0.290719	14.6851	14.0682	15.3021	0.314771	0.0502658
	2020	2020	2322	16569636	14.0136	13.4436	14.5836	0.290816	14.5853	13.9842	15.1864	0.306672	0.0520826
	2021	2021	2639	19356410	13.6337	13.1135	14.1539	0.265396	14.6768	14.1081	15.2455	0.290144	0.059193
	2022	2022	2689	19931567	13.4912	12.9812	14.0011	0.260168	14.052	13.5151	14.5889	0.273936	0.0603145
	2023	2023	2724	20473081	13.3053	12.8056	13.8049	0.25493	13.7245	13.2042	14.2448	0.265471	0.0610995
Total			44583
