# Supplementary material for: Trends and Disparities in Colorectal and Anal Carcinoma- Related Mortality Among U.S. Adults (1999-2023) with Predictions Using Machine Learning
Source: Research Square preprint supplement (doi:10.21203/rs.3.rs-8106965/v1), 2025-12-18
Supplement: Supplementary file 14 [file f285c844c9270a48a780fa7a.xlsx]

## Sheet: Sheet1
Notes	Year	Year Code	Deaths	Population	Crude Rate	Crude Rate Lower 95% Confidence Interval	Crude Rate Upper 95% Confidence Interval	Crude Rate Standard Error	Age Adjusted Rate	Age Adjusted Rate Lower 95% Confidence Interval	Age Adjusted Rate Upper 95% Confidence Interval	Age Adjusted Rate Standard Error	% of Total Deaths
	1999	1999	45997	151245342	30.4122	30.1342	30.6901	0.141802	32.0692	31.776	32.3623	0.149569	0.0481673
	2000	2000	46308	152658699	30.3343	30.058	30.6106	0.140963	31.8666	31.5763	32.1569	0.14812	0.0484929
	2001	2001	45851	154896258	29.6011	29.3302	29.8721	0.13824	30.9408	30.6575	31.2241	0.144552	0.0480144
	2002	2002	45612	156659051	29.1155	28.8483	29.3827	0.136328	30.2199	29.9423	30.4974	0.141614	0.0477641
	2003	2003	45217	158367715	28.5519	28.2887	28.8151	0.134272	29.4095	29.1381	29.681	0.138494	0.0473505
	2004	2004	43283	160272097	27.0059	26.7515	27.2604	0.129808	27.669	27.4078	27.9302	0.133259	0.0453252
	2005	2005	42907	162371826	26.4252	26.1751	26.6752	0.127571	26.87	26.6151	27.1249	0.130069	0.0449315
	2006	2006	43330	164523389	26.3367	26.0887	26.5847	0.126522	26.5538	26.3029	26.8048	0.128045	0.0453744
	2007	2007	43082	166650886	25.8516	25.6075	26.0958	0.124549	25.8142	25.5693	26.0591	0.124939	0.0451147
	2008	2008	42867	168826027	25.3912	25.1509	25.6316	0.122637	25.1652	24.9257	25.4048	0.122232	0.0448896
	2009	2009	42262	170965574	24.7196	24.4839	24.9553	0.120245	24.2218	23.9892	24.4544	0.118664	0.044256
	2010	2010	42249	172591105	24.4792	24.2458	24.7127	0.119094	23.7927	23.564	24.0215	0.116721	0.0442424
	2011	2011	42066	175204532	24.0097	23.7802	24.2391	0.117063	22.9818	22.7598	23.2037	0.11323	0.0440508
	2012	2012	41846	177423676	23.5854	23.3594	23.8113	0.115296	22.3468	22.1303	22.5634	0.110501	0.0438204
	2013	2013	42062	179634449	23.4153	23.1916	23.6391	0.114171	21.9418	21.7294	22.1542	0.108366	0.0440466
	2014	2014	42218	182304016	23.158	22.9371	23.3789	0.112707	21.447	21.2396	21.6544	0.105826	0.04421
	2015	2015	42846	184959306	23.1651	22.9457	23.3844	0.111913	21.2169	21.013	21.4208	0.104039	0.0448676
	2016	2016	43056	186963190	23.0291	22.8116	23.2467	0.110984	20.8869	20.6863	21.0874	0.102315	0.0450875
	2017	2017	43198	189675062	22.7747	22.56	22.9895	0.109578	20.4988	20.3023	20.6953	0.100252	0.0452362
	2018	2018	42913	191415024	22.4188	22.2067	22.6309	0.108223	19.9337	19.7421	20.1252	0.0977298	0.0449378
	2019	2019	42798	193006488	22.1744	21.9643	22.3845	0.107186	19.5018	19.314	19.6895	0.0957781	0.0448173
	2020	2020	42975	194600110	22.0837	21.875	22.2925	0.106528	19.2765	19.0911	19.462	0.0946153	0.0450027
Total			954943	3795213822	25.1618	25.1113	25.2122	0.0257485	24.1608	24.112	24.2095	0.0248624	1
