# Supplementary material for: Trends and Disparities in Colorectal and Anal Carcinoma- Related Mortality Among U.S. Adults (1999-2023) with Predictions Using Machine Learning
Source: Research Square preprint supplement (doi:10.21203/rs.3.rs-8106965/v1), 2025-12-18
Supplement: Supplementary file 15 [file f7b9b764876404be11acb03d.xlsx]

## Sheet: Sheet1
Notes	Year	Year Code	Deaths	Population	Crude Rate	Crude Rate Lower 95% Confidence Interval	Crude Rate Upper 95% Confidence Interval	Crude Rate Standard Error	Age Adjusted Rate	Age Adjusted Rate Lower 95% Confidence Interval	Age Adjusted Rate Upper 95% Confidence Interval	Age Adjusted Rate Standard Error	% of Total Deaths
	1999	1999	47248	134935890	35.0151	34.6994	35.3309	0.161088	32.0181	31.7291	32.3071	0.14746	0.0453575
	2000	2000	47291	135202971	34.9778	34.6625	35.293	0.160843	31.7533	31.4668	32.0398	0.146153	0.0453988
	2001	2001	46422	135651679	34.2215	33.9102	34.5328	0.158832	30.8696	30.5885	31.1508	0.143445	0.0445645
	2002	2002	46109	136026843	33.897	33.5876	34.2064	0.157859	30.2751	29.9983	30.5518	0.141203	0.0442641
	2003	2003	45181	136415868	33.12	32.8146	33.4254	0.155816	29.2811	29.0105	29.5517	0.138057	0.0433732
	2004	2004	43363	136956601	31.6619	31.3638	31.9599	0.152047	27.7839	27.5217	28.0461	0.133795	0.0416279
	2005	2005	42445	137614452	30.8434	30.55	31.1368	0.149709	26.829	26.5728	27.0852	0.13071	0.0407467
	2006	2006	42479	138363022	30.7011	30.4092	30.9931	0.148959	26.4692	26.2162	26.7221	0.129059	0.0407793
	2007	2007	42390	139060265	30.4832	30.193	30.7734	0.148057	26.0402	25.7907	26.2896	0.127271	0.0406939
	2008	2008	41787	139772453	29.8964	29.6098	30.1831	0.146251	25.2781	25.0339	25.5224	0.124597	0.040115
	2009	2009	40837	140451863	29.0754	28.7934	29.3574	0.14388	24.3388	24.1005	24.5772	0.121604	0.039203
	2010	2010	40658	140987505	28.838	28.5577	29.1183	0.143019	23.9635	23.7279	24.1992	0.120232	0.0390312
	2011	2011	40121	141789725	28.2961	28.0192	28.573	0.141267	23.2384	23.0077	23.4692	0.117717	0.0385157
	2012	2012	39850	142424668	27.9797	27.705	28.2544	0.140162	22.7217	22.4949	22.9486	0.115745	0.0382555
	2013	2013	39832	143045234	27.8457	27.5723	28.1192	0.139522	22.3903	22.1662	22.6145	0.114384	0.0382382
	2014	2014	39738	143642265	27.6646	27.3926	27.9366	0.138778	22.0222	21.8009	22.2436	0.112936	0.038148
	2015	2015	40028	144347874	27.7302	27.4586	28.0019	0.138603	21.8565	21.6373	22.0757	0.111846	0.0384264
	2016	2016	39795	144979180	27.4488	27.1791	27.7185	0.137597	21.4464	21.2301	21.6628	0.110369	0.0382027
	2017	2017	39769	145456222	27.3409	27.0722	27.6096	0.137101	21.1898	20.9754	21.4042	0.109398	0.0381778
	2018	2018	39465	145801376	27.0676	26.8006	27.3347	0.136252	20.7501	20.5391	20.961	0.107646	0.0378859
	2019	2019	39211	146079678	26.8422	26.5765	27.1079	0.135555	20.3434	20.1355	20.5513	0.106052	0.0376421
	2020	2020	38847	146337256	26.5462	26.2822	26.8102	0.134686	20.0151	19.809	20.2212	0.105162	0.0372926
	2021	2021	39408	144655323	27.2427	26.9737	27.5117	0.137233	20.941	20.727	21.155	0.109166	0.0378312
	2022	2022	39471	144499701	27.3156	27.0461	27.5851	0.13749	20.4343	20.2252	20.6435	0.106707	0.0378917
	2023	2023	39935	144415042	27.6529	27.3817	27.9242	0.138377	20.6472	20.437	20.8574	0.107248	0.0383371
Total			1041680
